# Supplementary material for: Biomimetic deiodination of thyroid hormones and iodothyronamines – a structure–activity relationship study
Source: Royal Society of Chemistry journal article supplement (doi:10.1039/c6ob01375a), 2016-01-01
Supplement: c6ob01375a1.pdf [file c6ob01375a1.pdf]

## Supplementary Information

### Biomimetic Deiodination of Thyroid Hormones and Iodothyronamines – A Structure-Activity Relationship Study

Santanu Mondal and Govindasamy Mugesh\*

#### General Procedure

Tyramine, iodine monochloride (ICl), tri-isopropylborate, tetrabutylammonium fluoride (TBAF), borontrifluoride diethyletherate (BF<sub>3</sub>-Et<sub>2</sub>O), ethane dithiol, selenium powder, T<sub>4</sub>, rT<sub>3</sub>, T<sub>3</sub>, acetonitrile were obtained from Sigma-Aldrich. *n*-Butyllithium (*n*-BuLi) was purchased from Acros Chemical Co. (Belgium). Dithiothreitol (DTT) and anhydrous cupric acetate were bought from Alfa Aesar. 3,5-diodothyronine (3,5-T<sub>2</sub>) was purchased from TCI Chemicals (India) Private Limited. Trifluoroacetic acid (TFA) and precoated silica gel plates were obtained from Merck. Liquid state NMR spectra were recorded in CDCl<sub>3</sub> or *d*<sub>4</sub>-MeOH or *d*<sub>6</sub>-DMSO as solvent. <sup>1</sup>H (400 MHz), <sup>13</sup>C (100.56 MHz), <sup>77</sup>Se (76.29 MHz) NMR spectra were recorded using a Bruker 400 MHz NMR spectrometer. Chemical shift values are cited with respect to SiMe<sub>4</sub> as internal (<sup>1</sup>H and <sup>13</sup>C) and Me<sub>2</sub>Se as external (<sup>77</sup>Se) standard. Column chromatography was carried out in glass columns or in an automated flash chromatography system (Biotage) by using preloaded silica cartridges. HPLC experiments were carried out on a Waters Alliance system (Milford, MA) consisting of a 2695 separation module and a 2996 photodiode-array detector. 1.7 mL HPLC sample vials were used to perform the deiodinase assays and a built in auto-sampler was used for sample injection. The HPLC system was controlled by EMPOWER software (Waters corporation, Milford, MA). Single crystal X-ray diffraction data were obtained by Bruker Kappa Apex II X-ray diffractometer using a CCD detector.

Table S01. The initial rates of deiodination of T4, T3, T3AM, 3,5-T2 and 3,5-T2AM by compounds **3** and **5-10**.

| compounds | Initial rates ( $\times 10^{-2}$ $\mu\text{M}/\text{min}$ ) |                  |                |                 |                |
|-----------|-------------------------------------------------------------|------------------|----------------|-----------------|----------------|
|           | T4                                                          | T3               | T3AM           | 3,5-T2          | 3,5-T2AM       |
| <b>3</b>  | $38.1 \pm 0.9$                                              | $127.9 \pm 4.7$  | $12.0 \pm 1.4$ | $54.6 \pm 1.6$  | $16.1 \pm 0.2$ |
| <b>5</b>  | $97.4 \pm 5.2$                                              | $144.1 \pm 5.5$  | $27.9 \pm 1.8$ | $170.6 \pm 1.5$ | $17.2 \pm 0.6$ |
| <b>6</b>  | $70.7 \pm 2.5$                                              | $158.4 \pm 4.1$  | $20.4 \pm 0.1$ | $141.9 \pm 3.0$ | $16.9 \pm 0.3$ |
| <b>7</b>  | $70.5 \pm 3.0$                                              | $194.3 \pm 6.3$  | $29.1 \pm 1.9$ | $119.3 \pm 0.9$ | $29.4 \pm 0.5$ |
| <b>8</b>  | $117.4 \pm 8.3$                                             | $296.7 \pm 3.6$  | $81.1 \pm 2.1$ | $165.0 \pm 4.4$ | $42.0 \pm 0.7$ |
| <b>9</b>  | $83.5 \pm 3.1$                                              | $226.3 \pm 12.2$ | $28.5 \pm 1.5$ | $158.7 \pm 2.0$ | $25.0 \pm 0.4$ |
| <b>10</b> | $79.8 \pm 2.0$                                              | $203.6 \pm 4.3$  | $21.6 \pm 0.1$ | $142.2 \pm 1.0$ | $20.7 \pm 0.8$ |

Table S02. The initial rates of deiodination of T3AM and 3,5-T2AM by compound **9** at different pH.

| Substrate | Initial rate ( $\mu\text{M}/\text{min}$ ) |                  |                  |                  |                  |
|-----------|-------------------------------------------|------------------|------------------|------------------|------------------|
|           | pH 7.0                                    | pH 8.0           | pH 9.0           | pH 10.0          | pH 11.0          |
| T3AM      | $0.28 \pm 0.015$                          | $0.33 \pm 0.014$ | $0.39 \pm 0.010$ | $0.62 \pm 0.010$ | $0.92 \pm 0.020$ |
| 3,5-T2AM  | $0.25 \pm 0.004$                          | $1.29 \pm 0.050$ | $1.72 \pm 0.020$ | $2.01 \pm 0.115$ | $2.23 \pm 0.092$ |

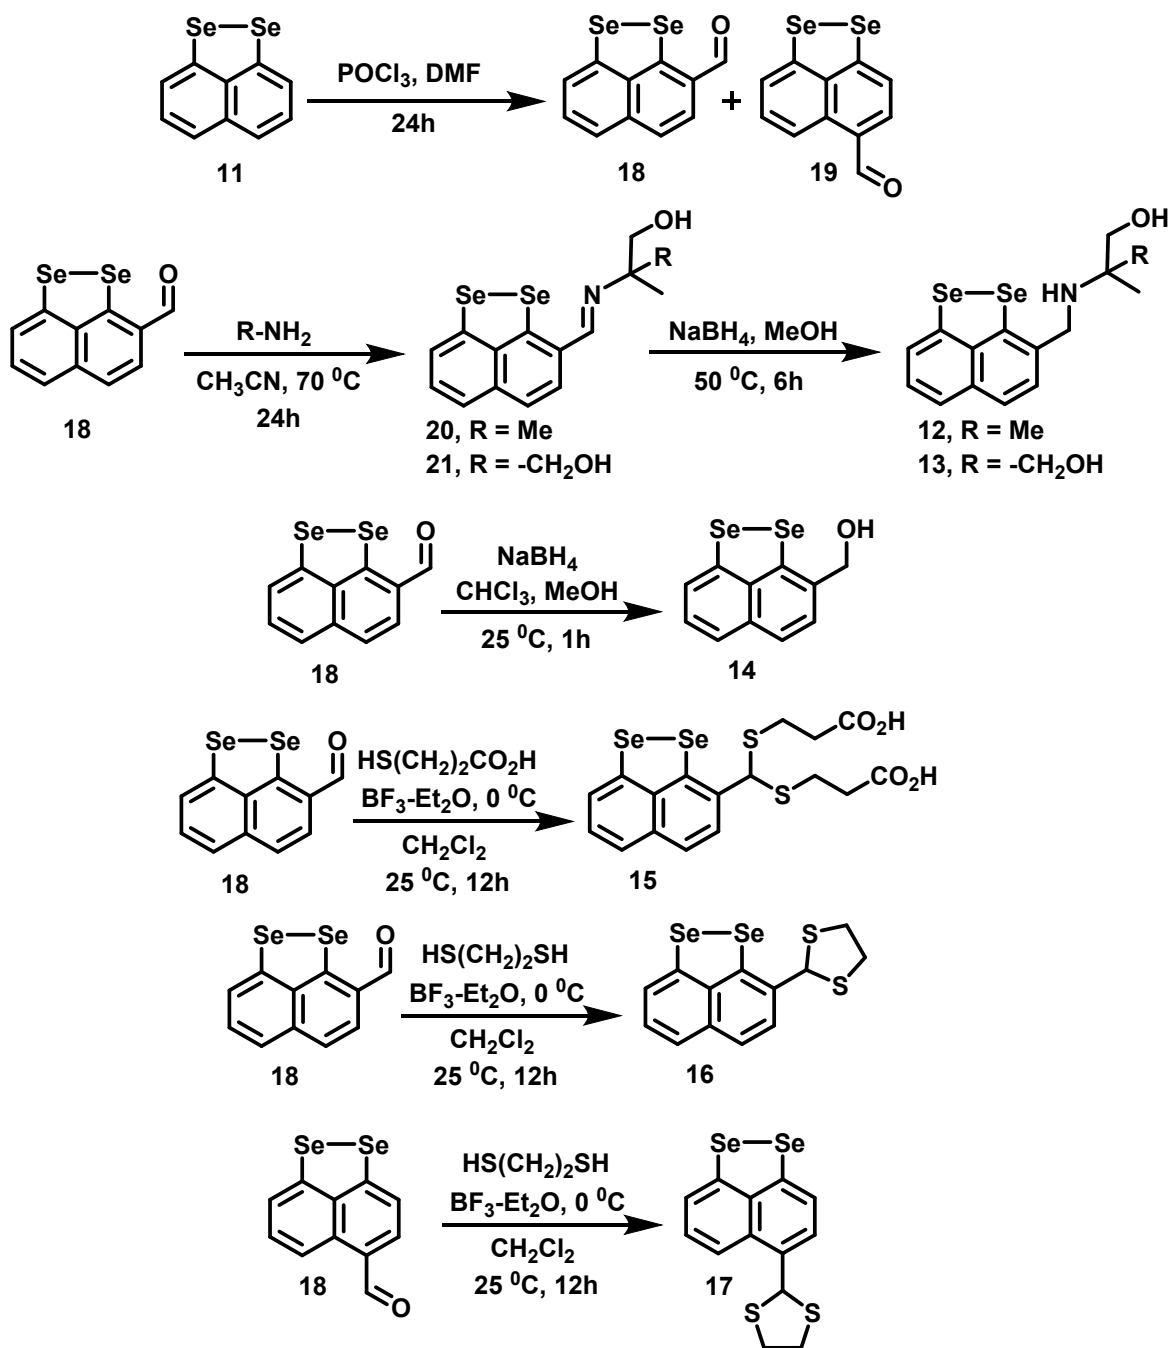

Scheme S01. Synthesis of 12-17.

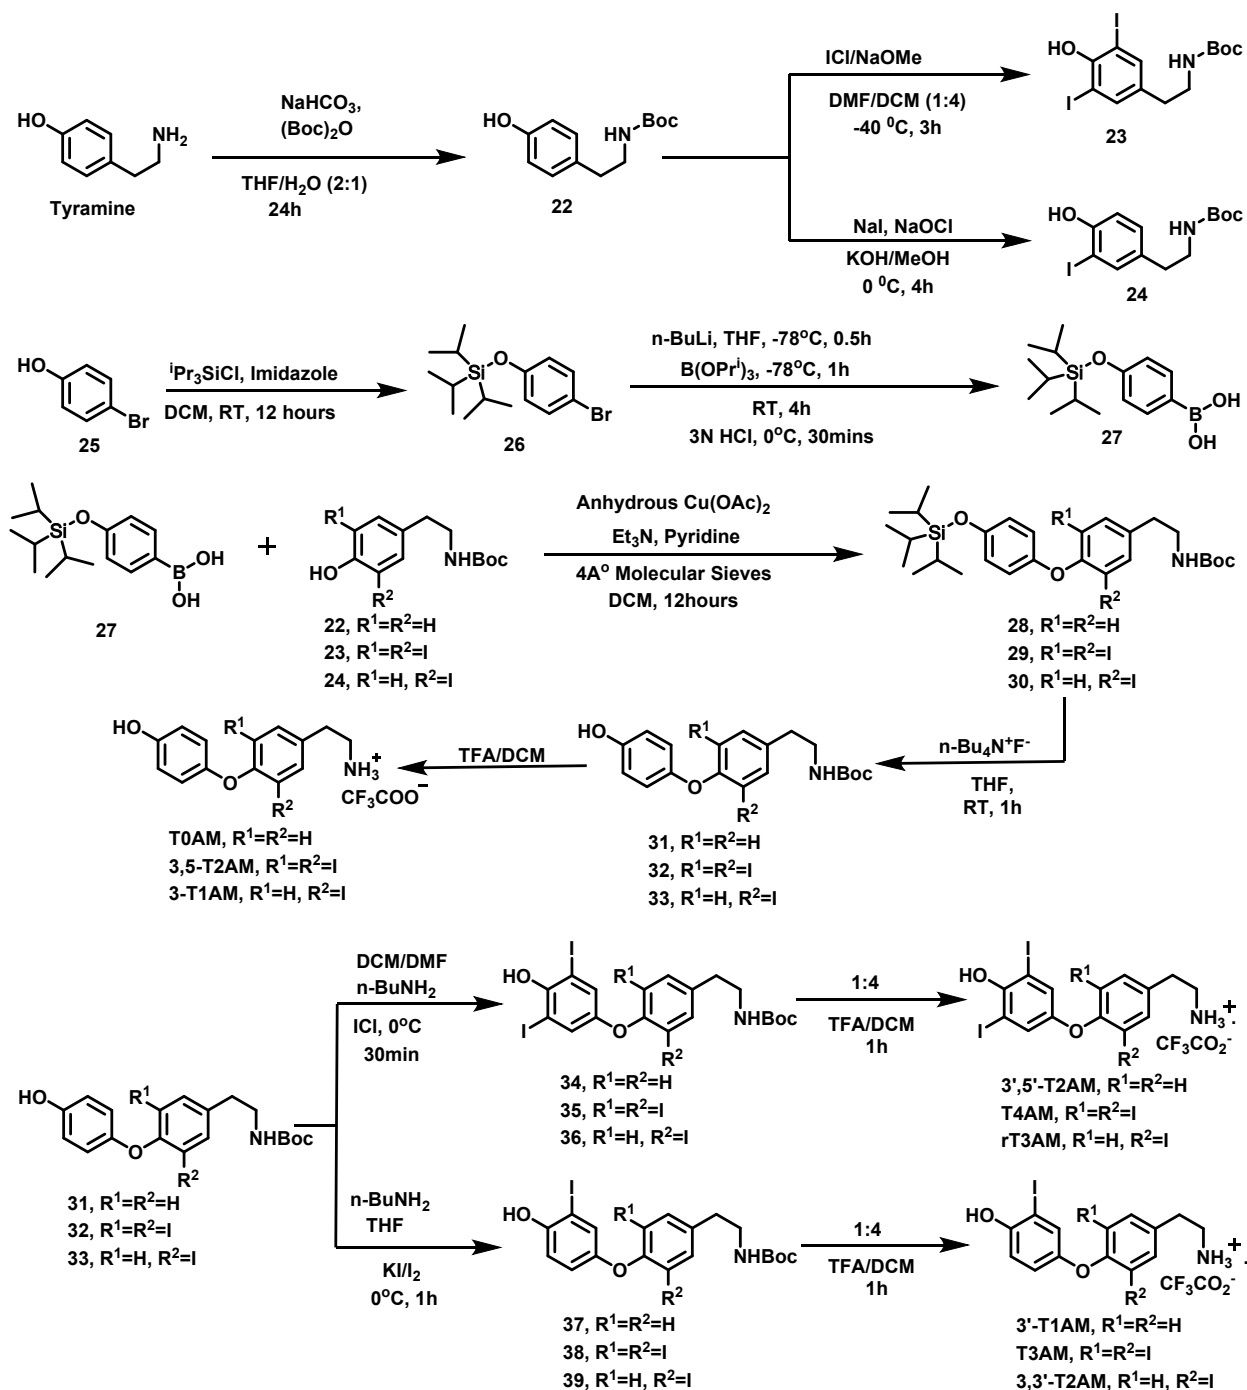

Scheme S02. Synthesis of Iodothyronamines.

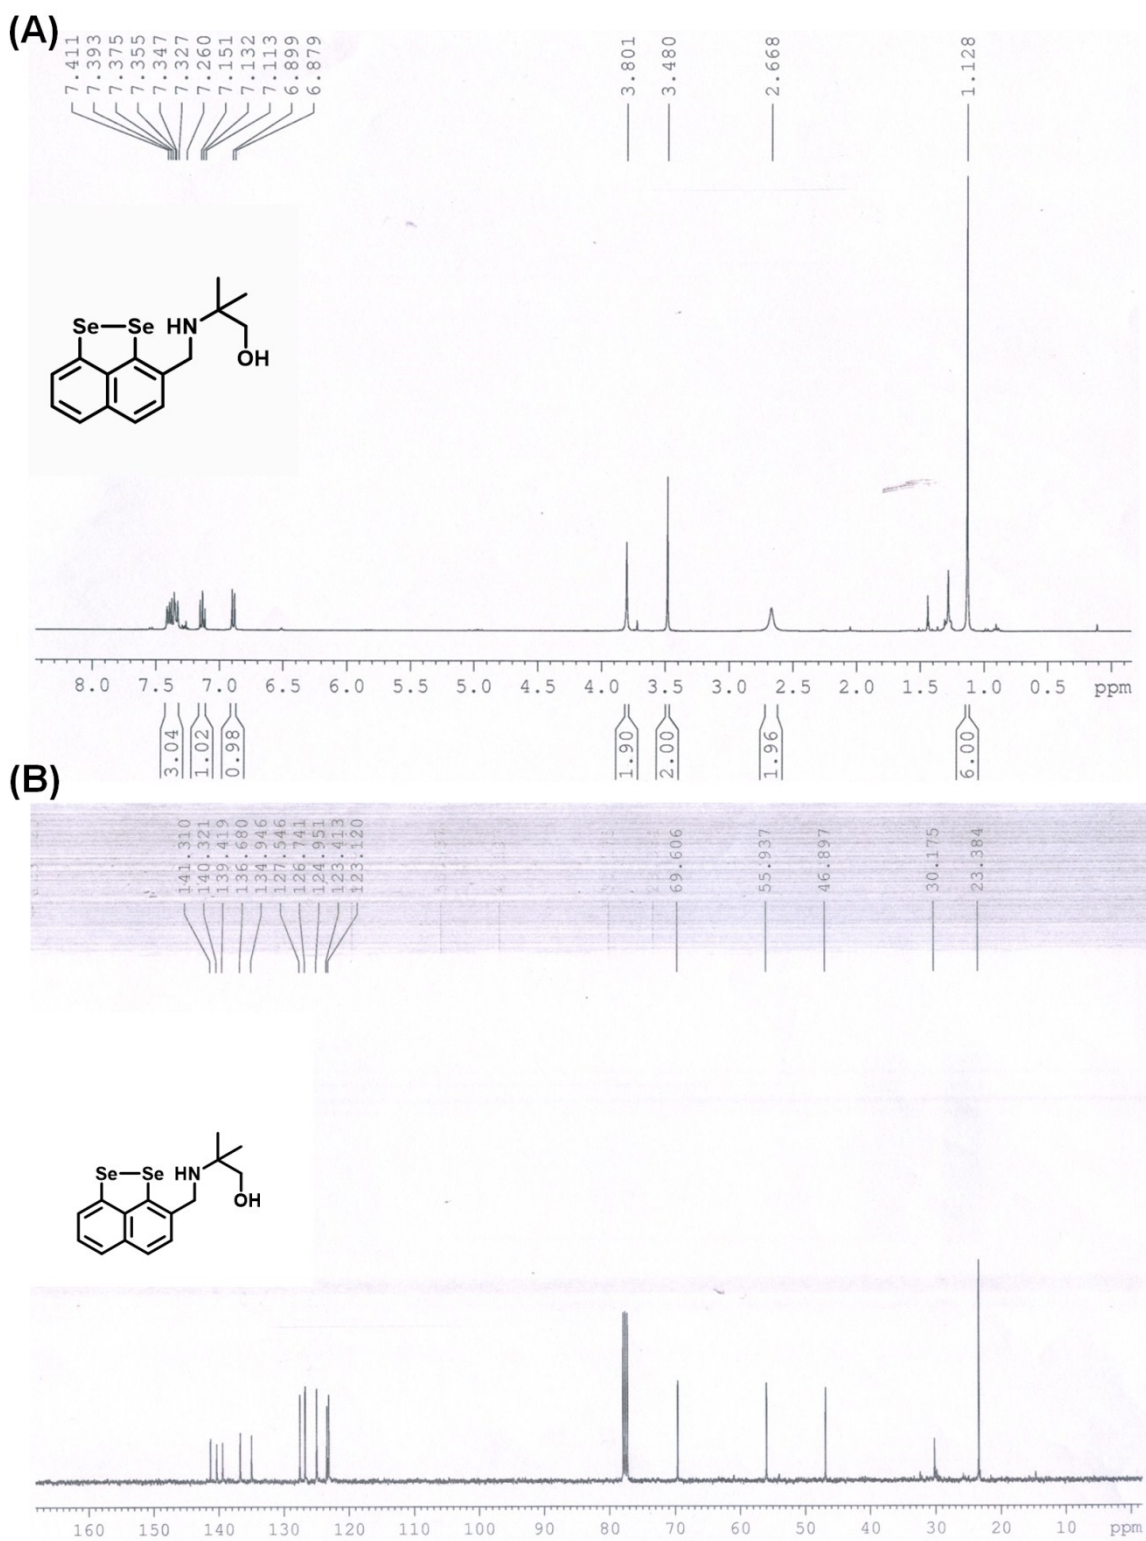

Figure S01.  $^1\text{H}$  (A) and  $^{13}\text{C}$  (B) NMR spectra of **12** in  $\text{CDCl}_3$ .

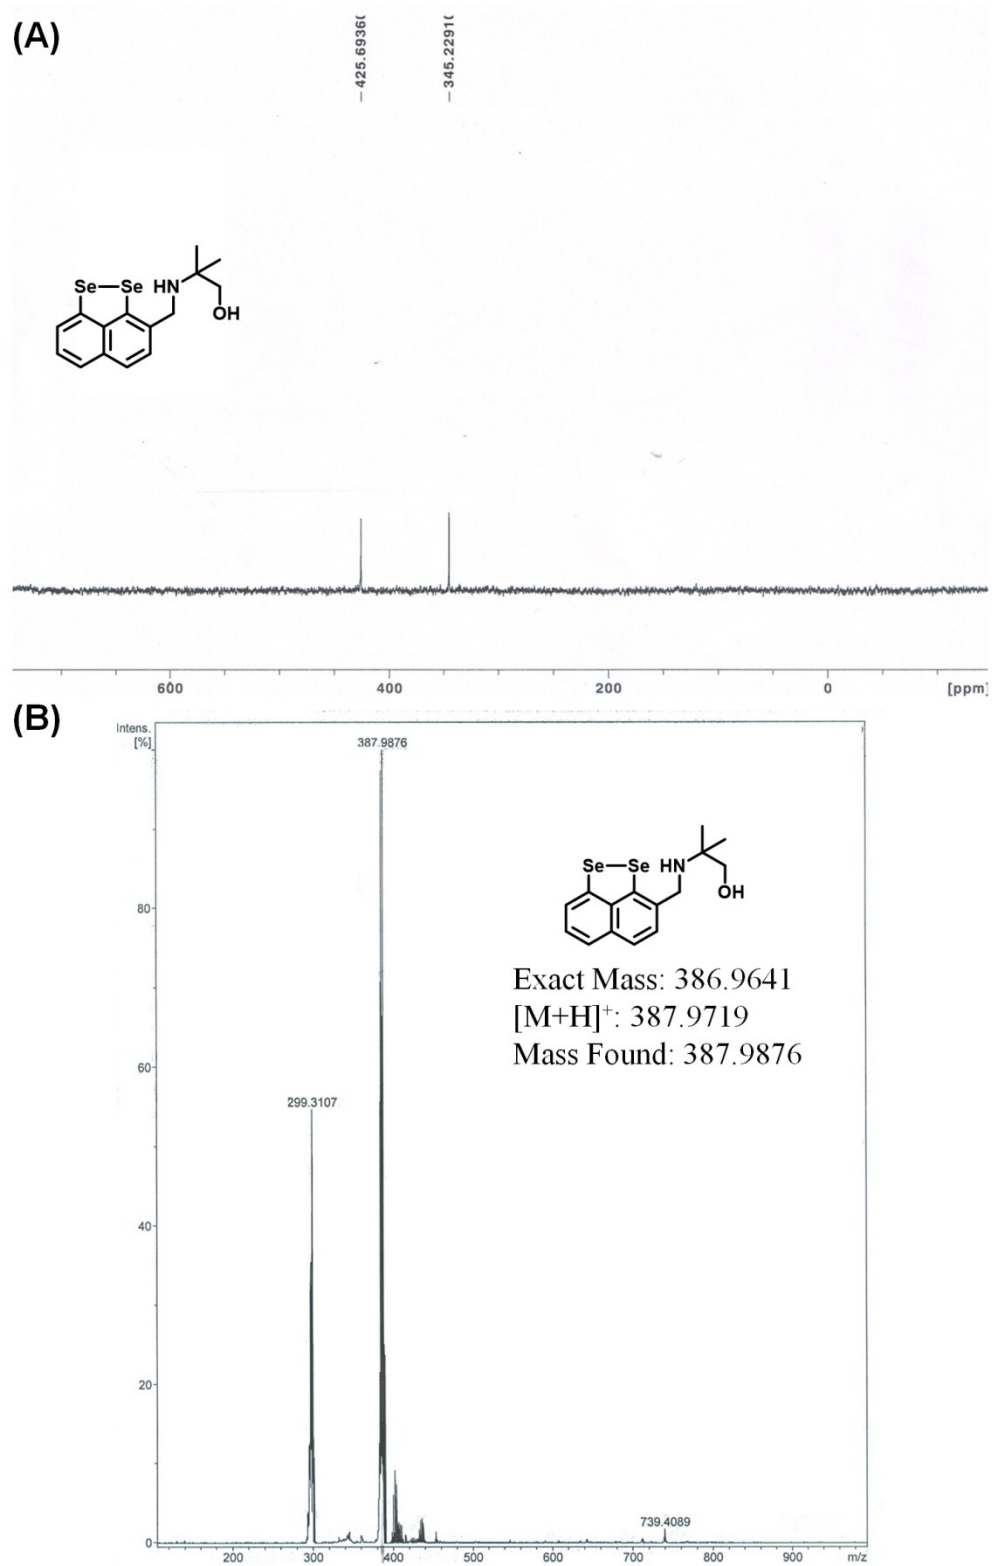

Figure S02. <sup>77</sup>Se NMR in CHCl<sub>3</sub> (A) and ESI-Mass spectra (B) of **12**.

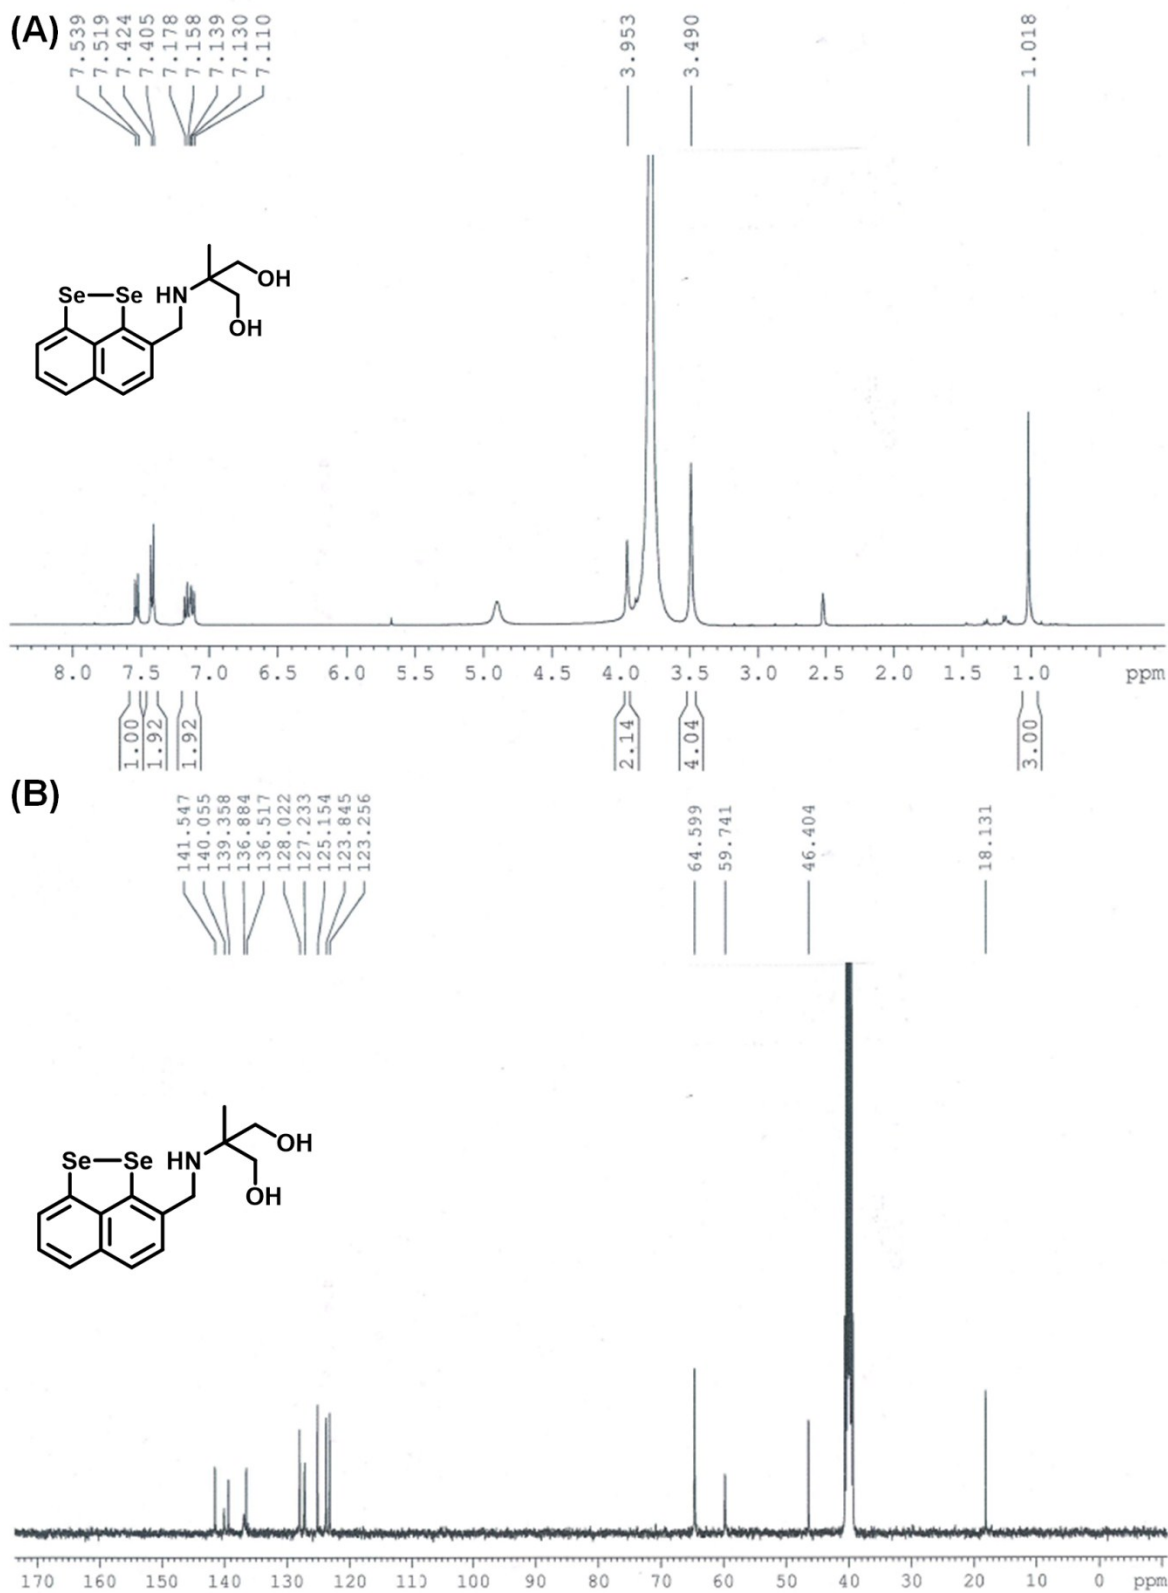

Figure S03.  $^1\text{H}$  (A) and  $^{13}\text{C}$  (B) NMR spectra of **13** in  $\text{DMSO-}d_6$ .

(A)

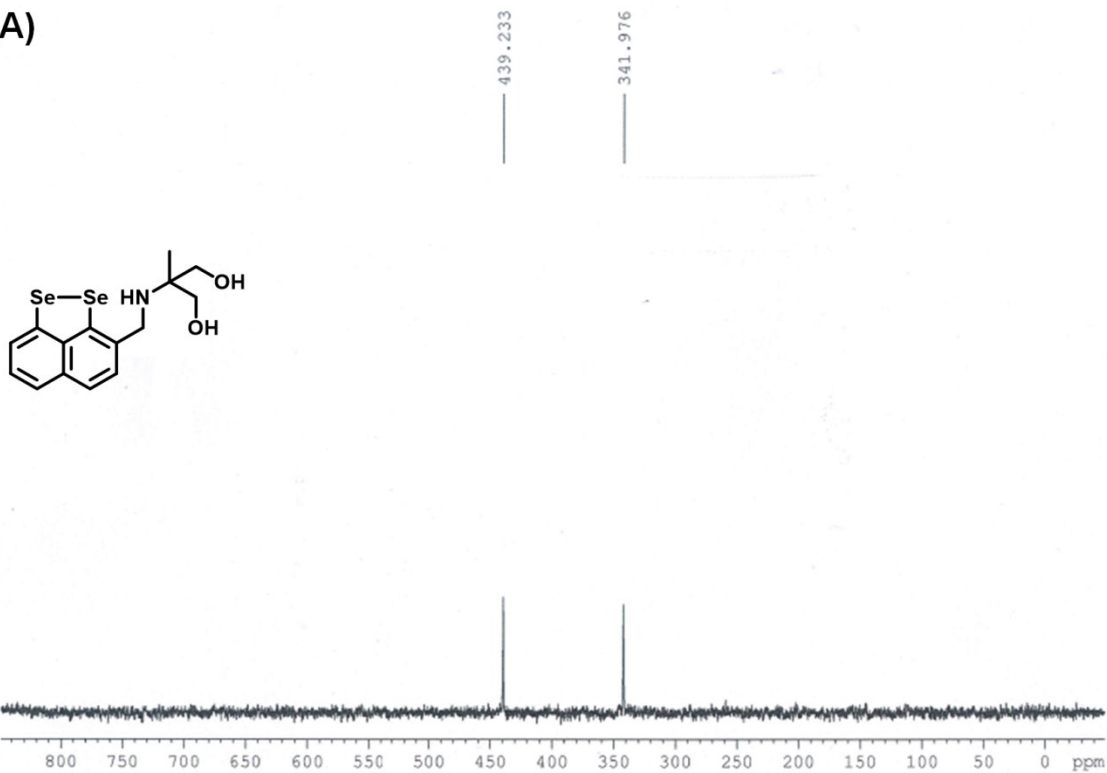

(B)

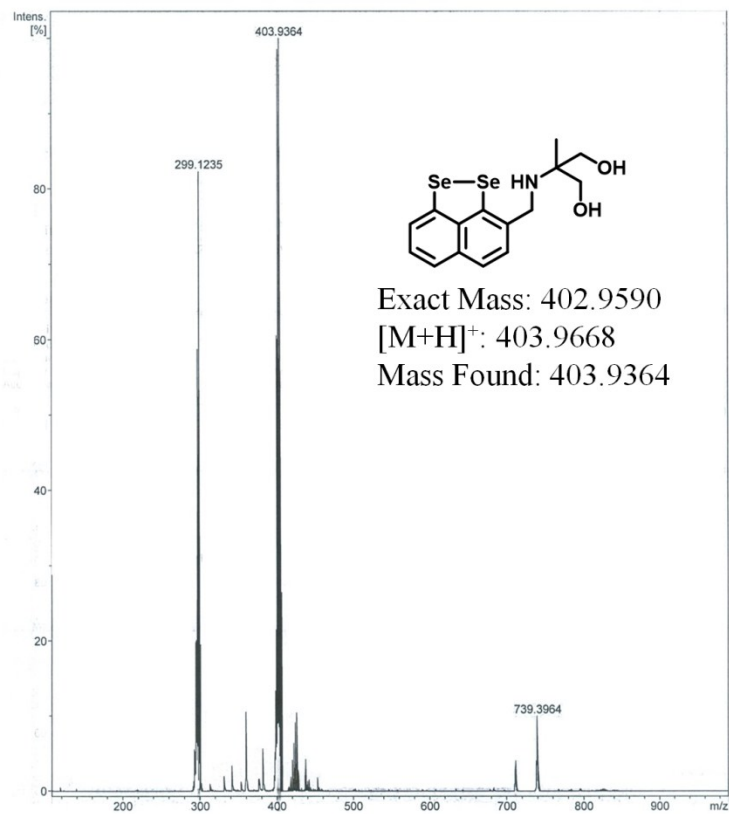

Figure S04. <sup>77</sup>Se NMR in DMSO-*d*<sub>6</sub> (A) and ESI-Mass spectra (B) of **13**.



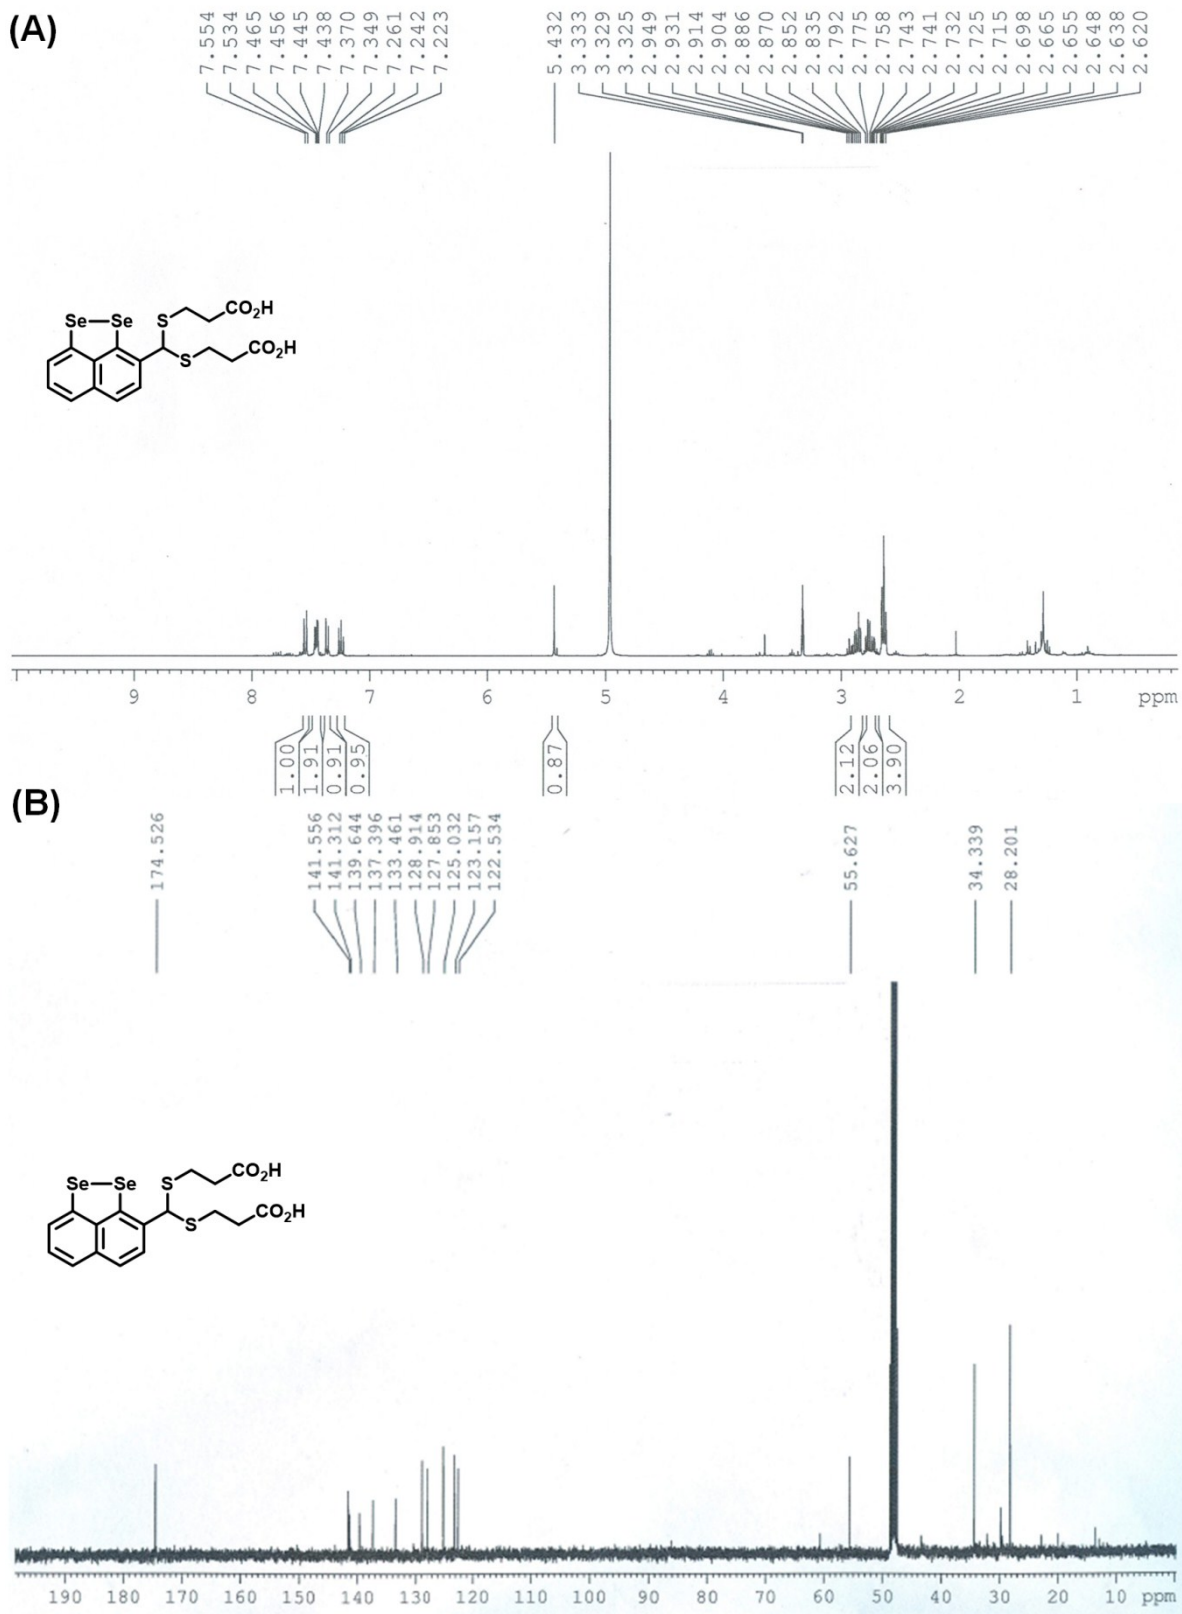

Figure S05.  $^1\text{H}$  (A) and  $^{13}\text{C}$  (B) NMR spectra of **15** in  $d_4$ -MeOH.

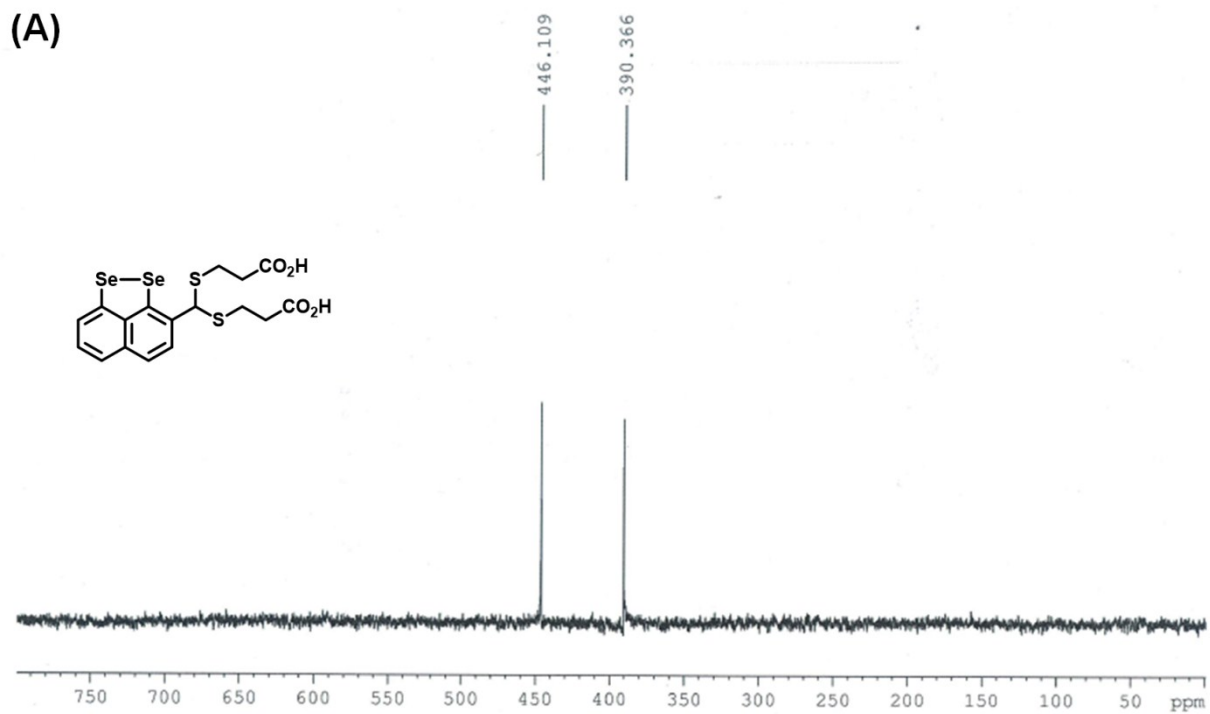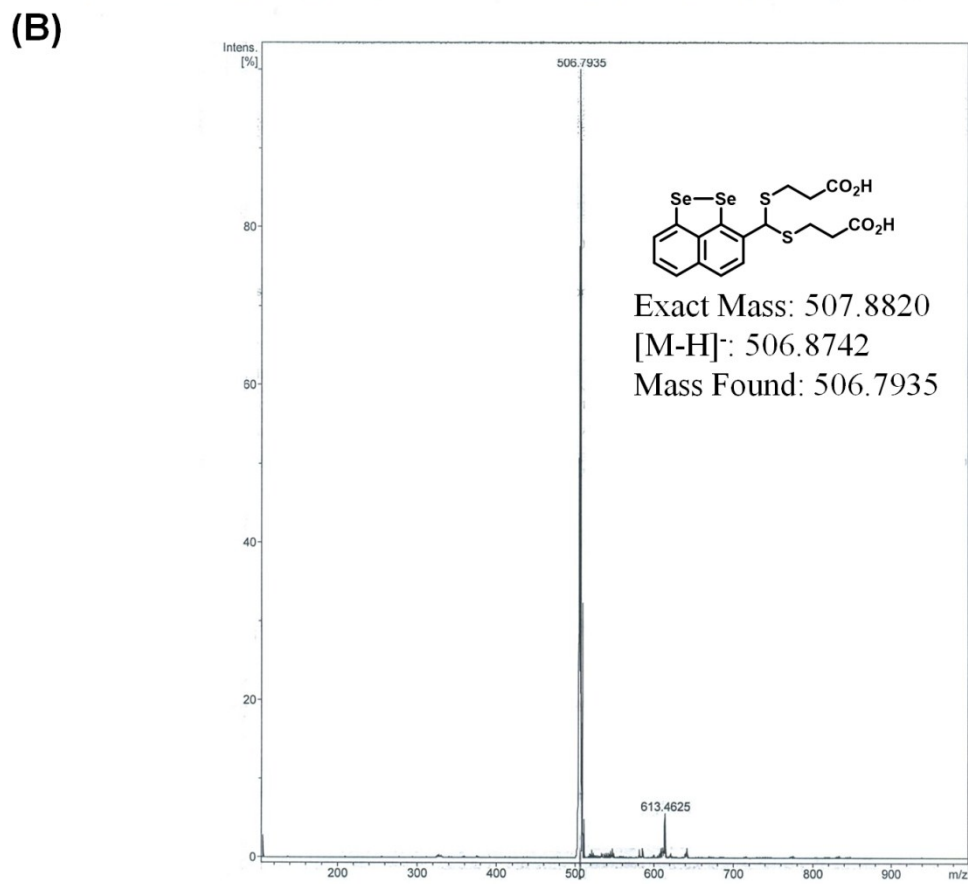

Figure S06. <sup>77</sup>Se NMR in CDCl<sub>3</sub> (A) and ESI-Mass spectra (B) of **15**.

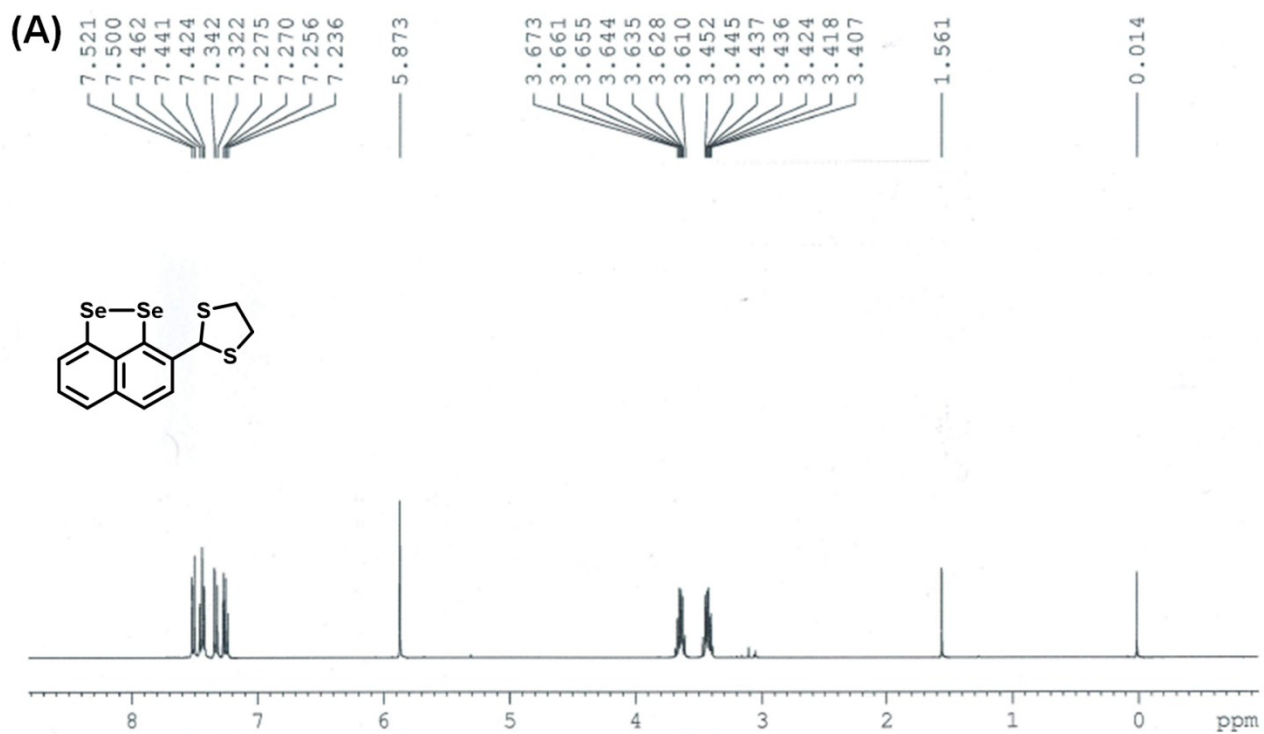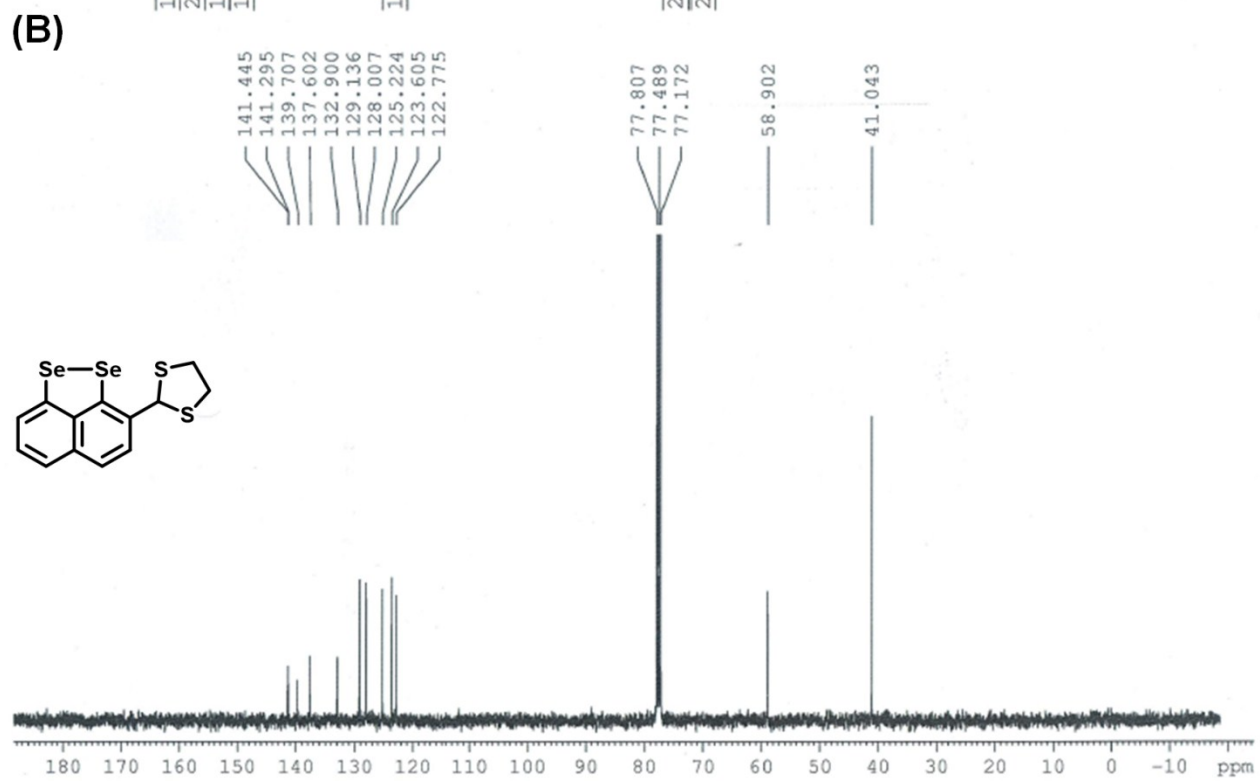

Figure S07. <sup>1</sup>H (A) and <sup>13</sup>C (B) NMR spectra of **16** in CDCl<sub>3</sub>.

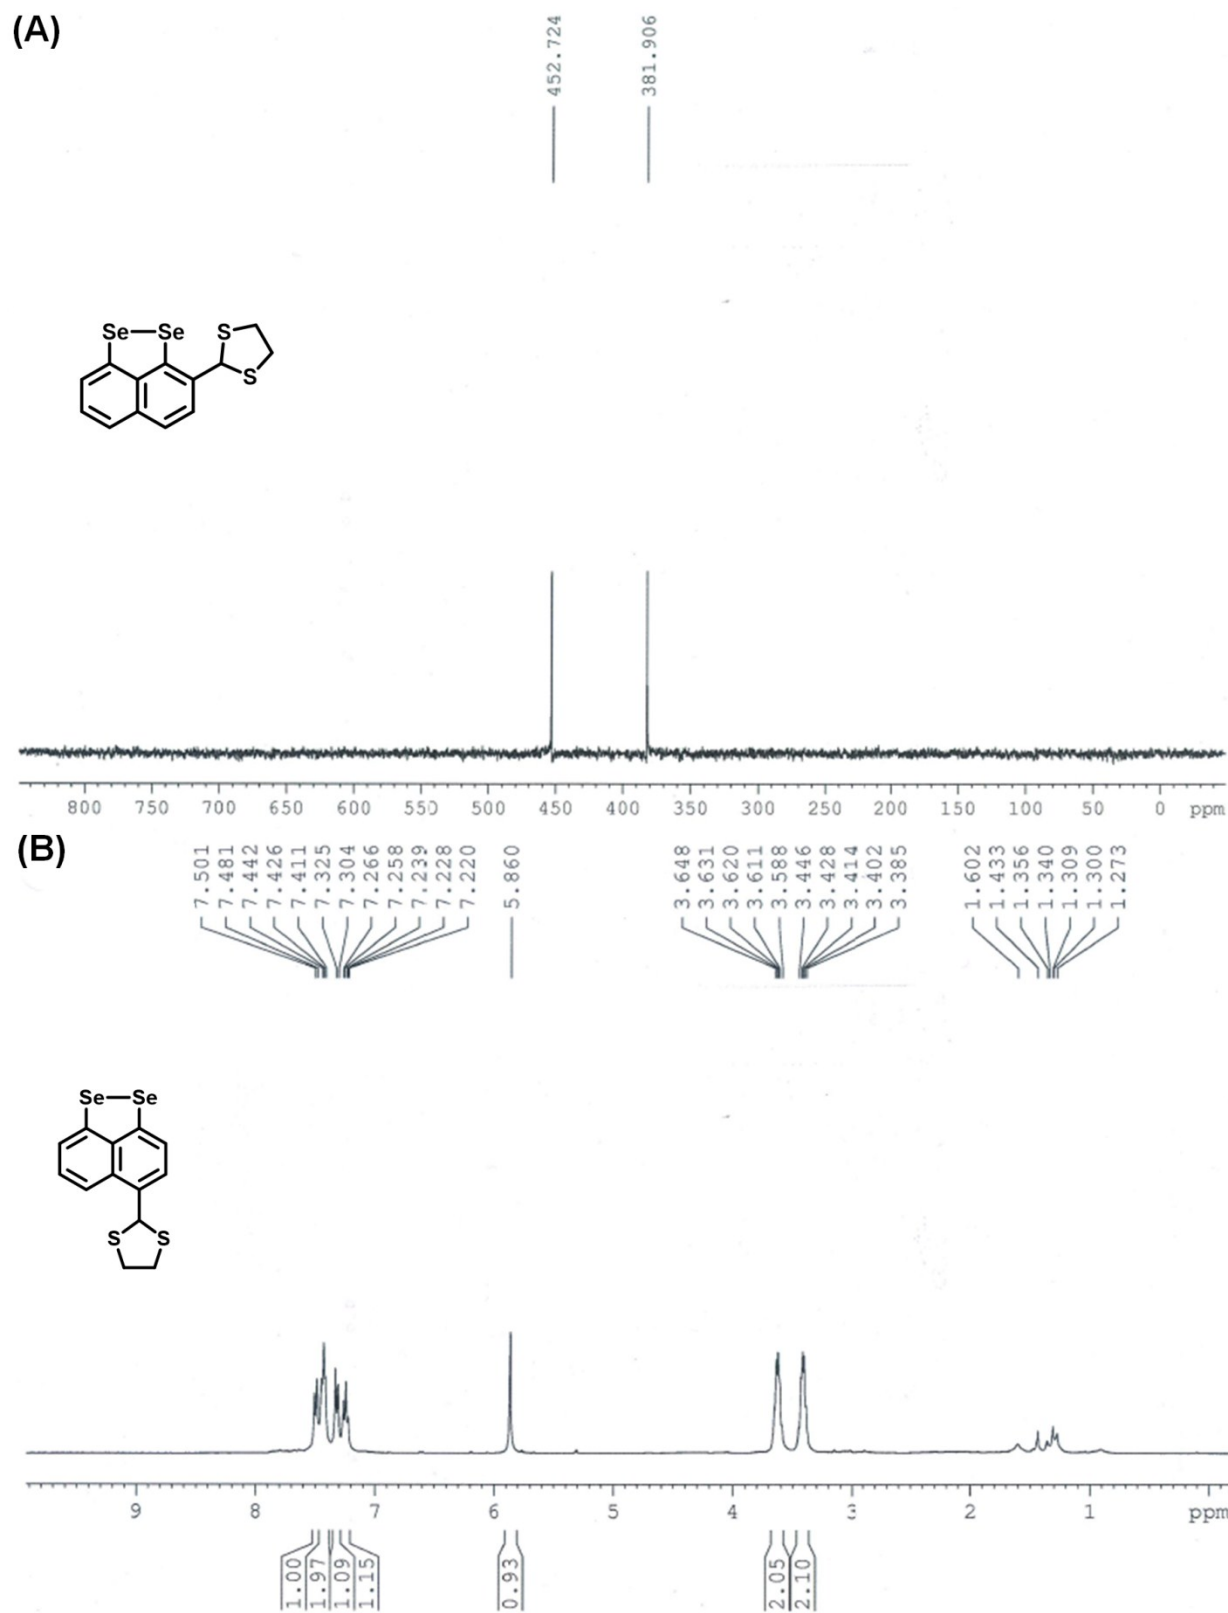

Figure S08.  $^{77}\text{Se}$  NMR of **16** (A) and  $^1\text{H}$  NMR spectra of **17** (B) in  $\text{CDCl}_3$ .

(A)

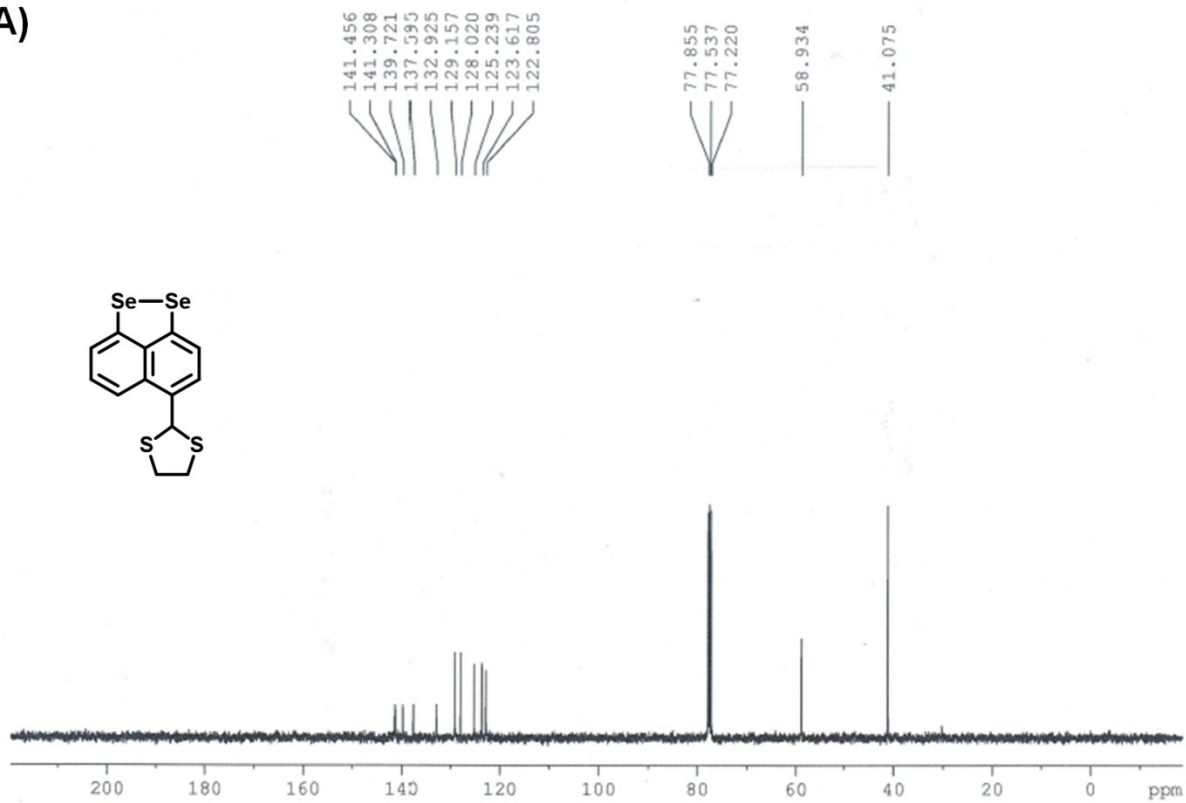

(B)

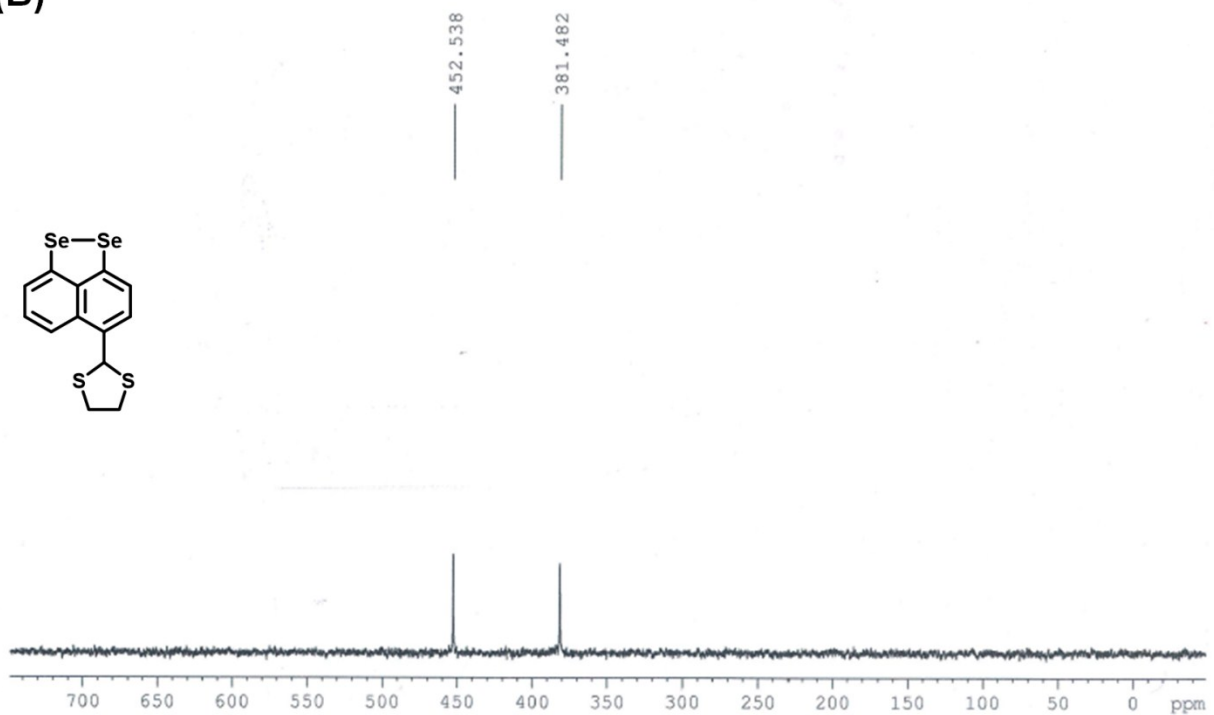

Figure S09. <sup>13</sup>C NMR (A) and <sup>77</sup>Se NMR (B) spectra of **17** in CDCl<sub>3</sub>.

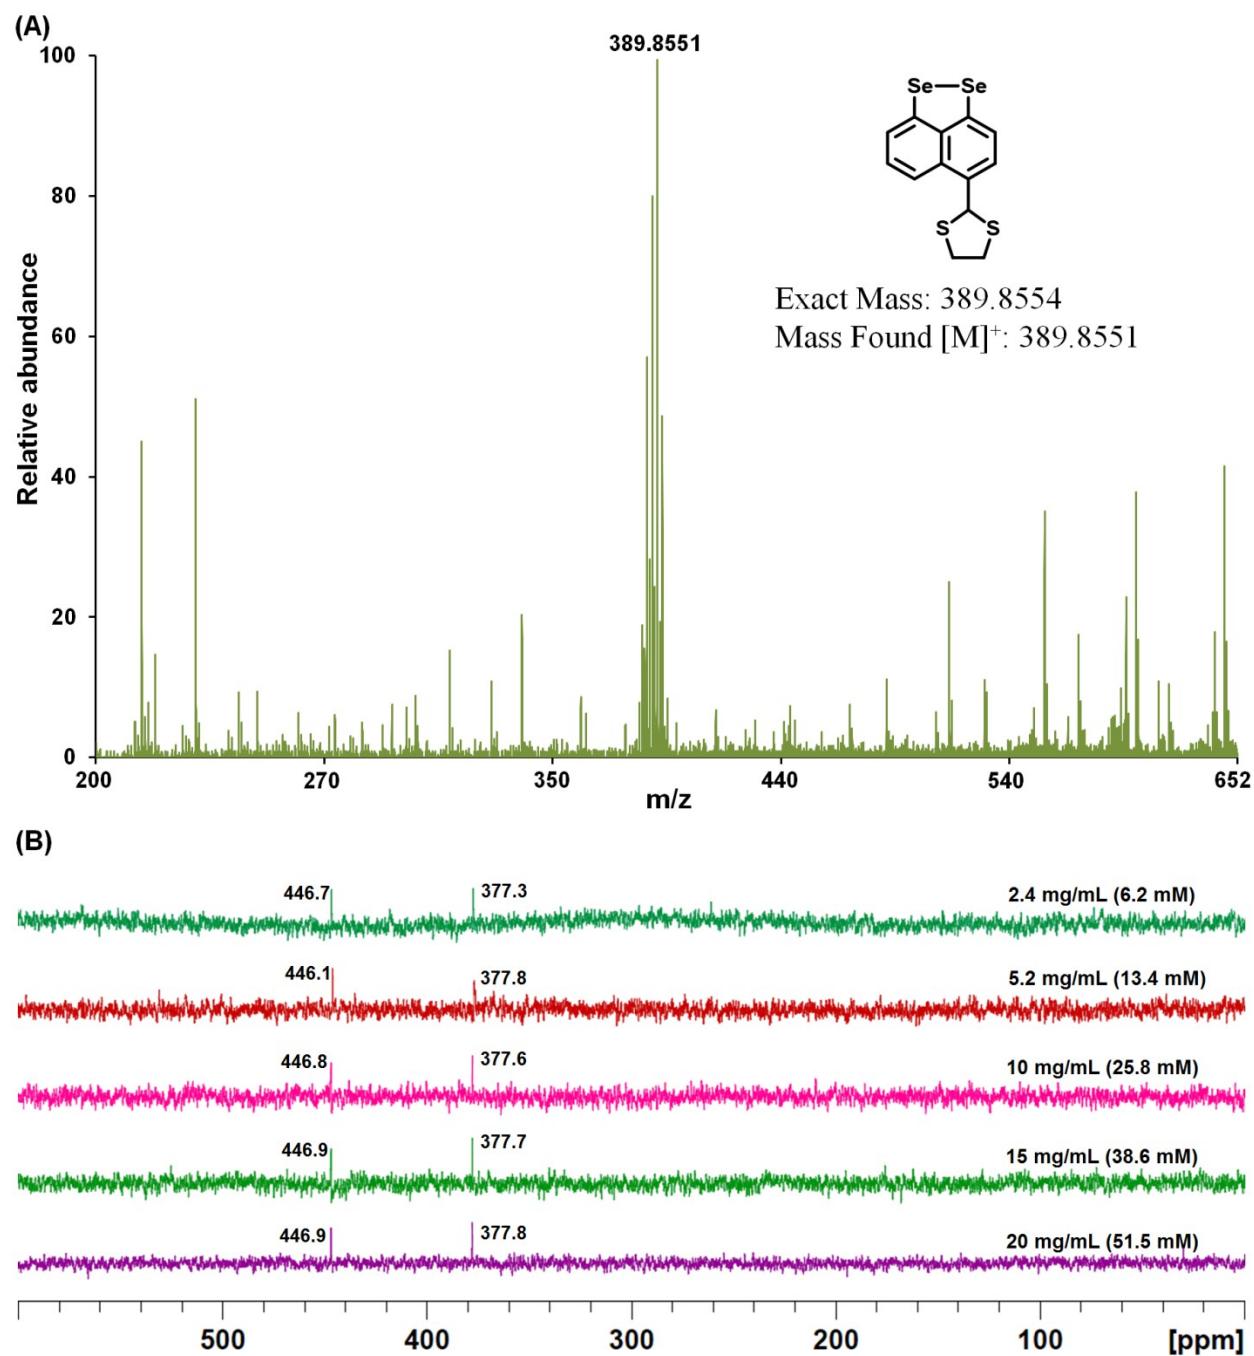

Figure S10. (A) ESI-Mass spectrum of **17**. (B)  $^{77}\text{Se}$  NMR spectra of **17** in dichloromethane recorded at different concentrations. Although **17** is expected to exhibit two  $^{77}\text{Se}$  signals due to its unsymmetrical structure, in comparison to compounds **15** and **16**, the almost identical chemical shifts in the  $^{77}\text{Se}$  NMR spectra of **17** suggests that there may be intermolecular  $\text{Se}\cdots\text{S}$  interactions, which may not break at 6.2 mM concentration. Unfortunately, the  $^{77}\text{Se}$  NMR of **17** could not be recorded at further low concentrations due to low natural abundance of  $^{77}\text{Se}$  nuclei.

(A)

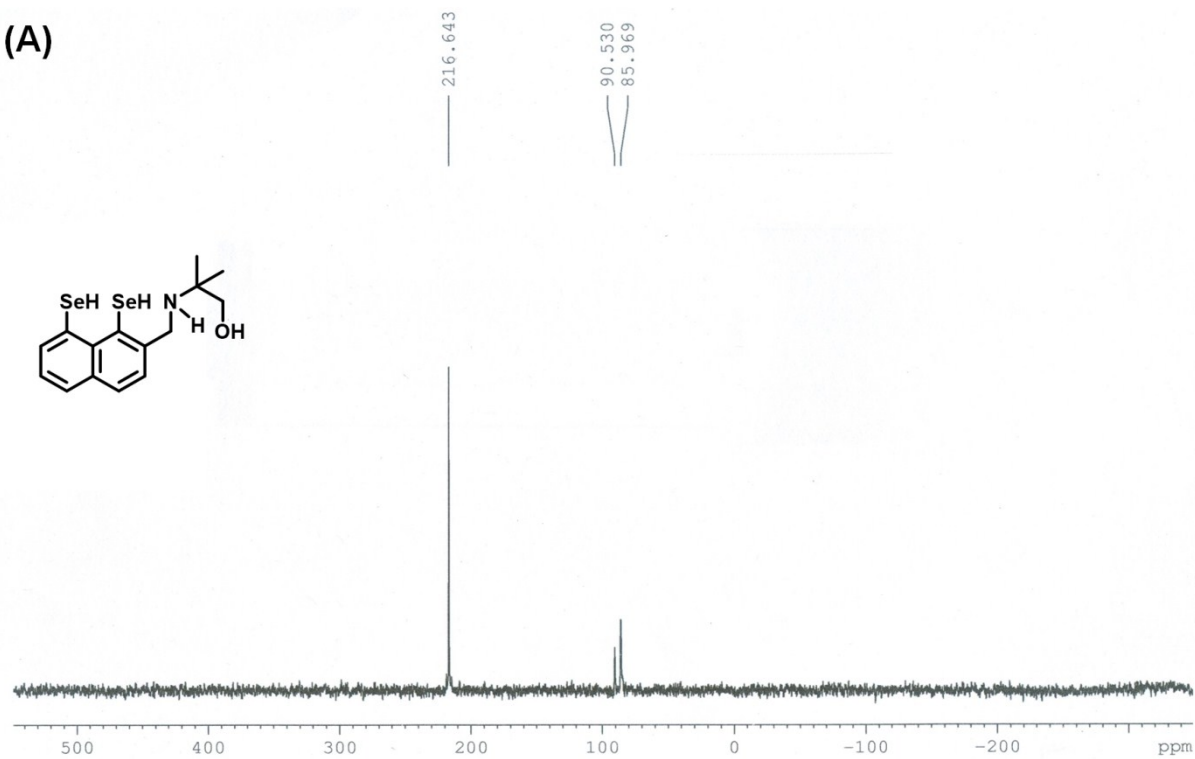

(B)

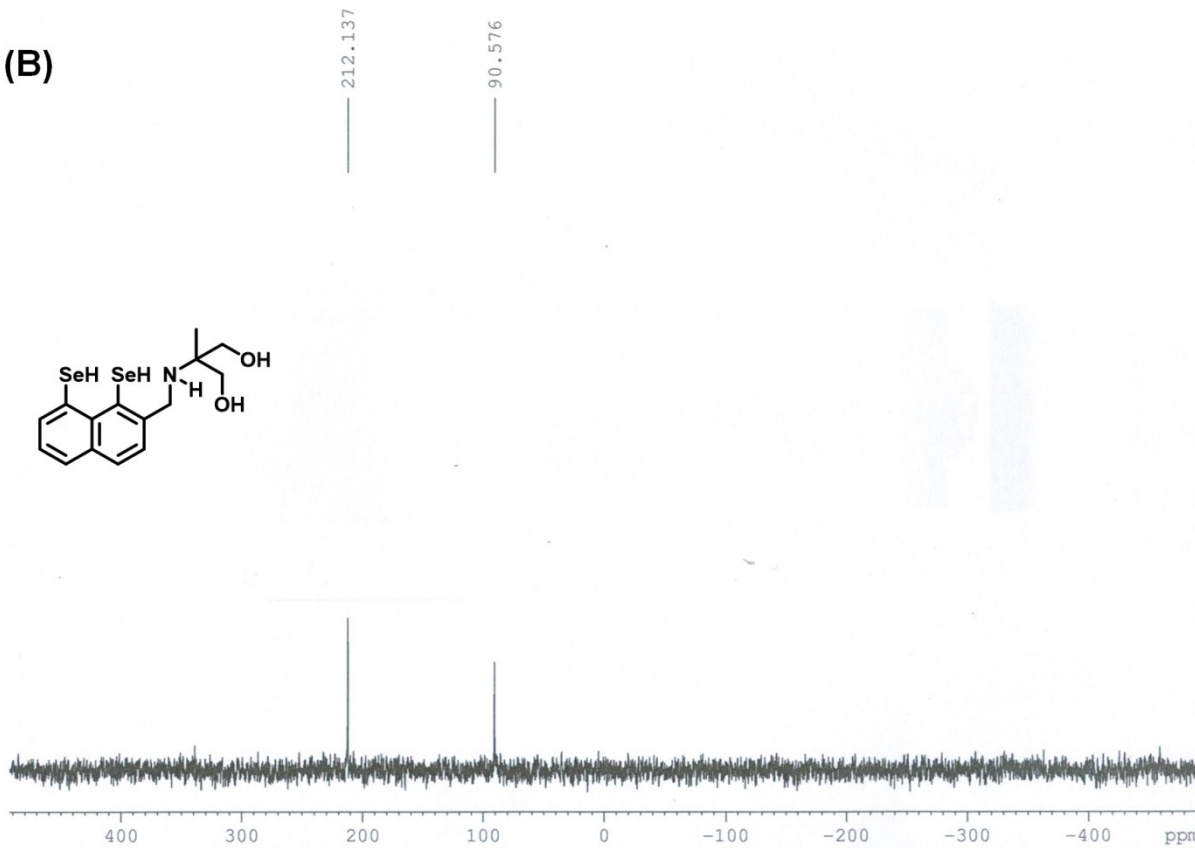

Figure S11. <sup>77</sup>Se NMR spectra of **5** (A) and **6** (B) in a mixture of 1:1 CHCl<sub>3</sub> and MeOH.



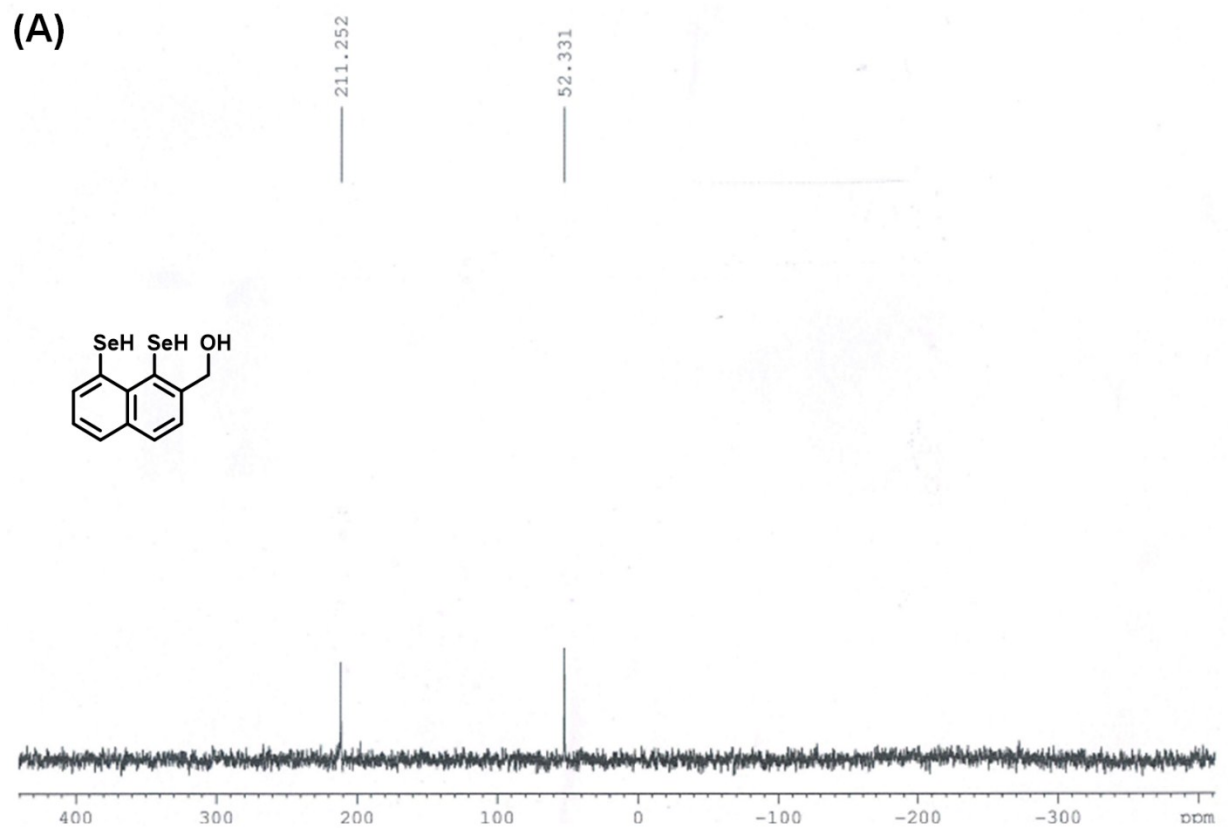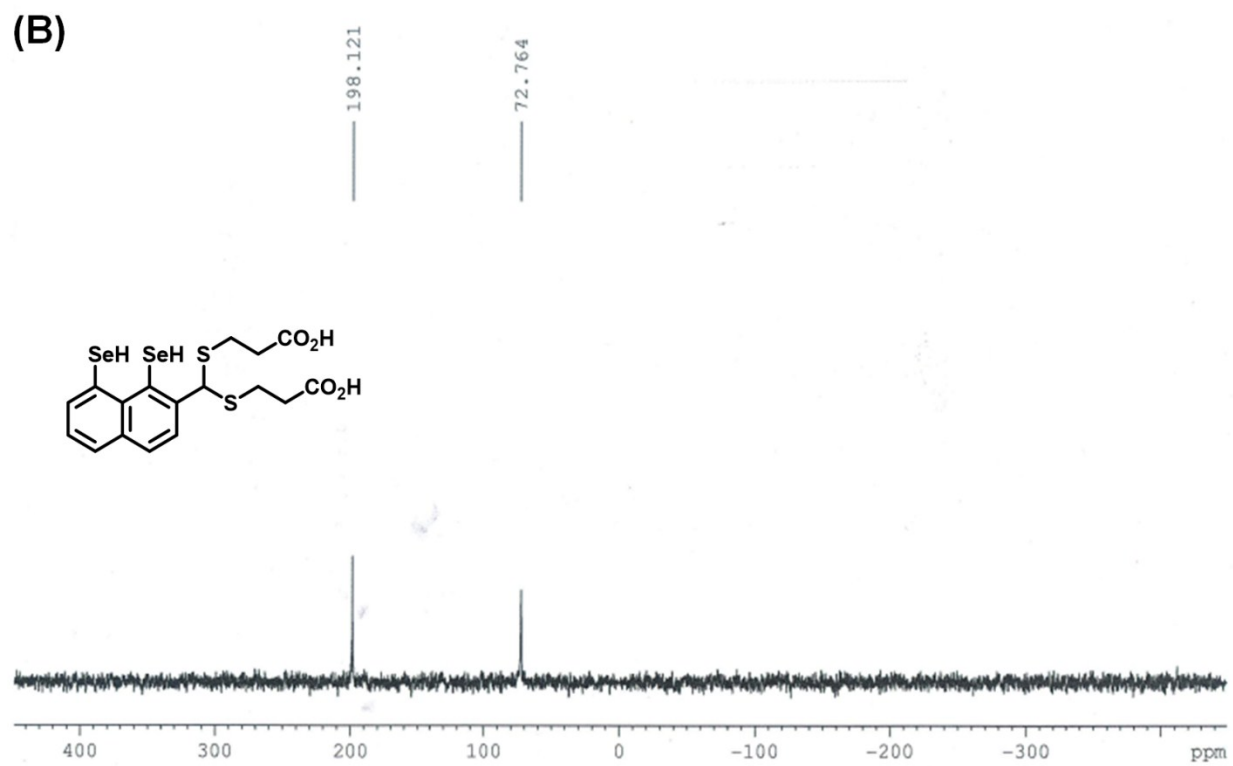

Figure S12.  $^{77}\text{Se}$  NMR spectra of **7** (A) and **8** (B) in a mixture of 1:1  $\text{CHCl}_3$  and MeOH.



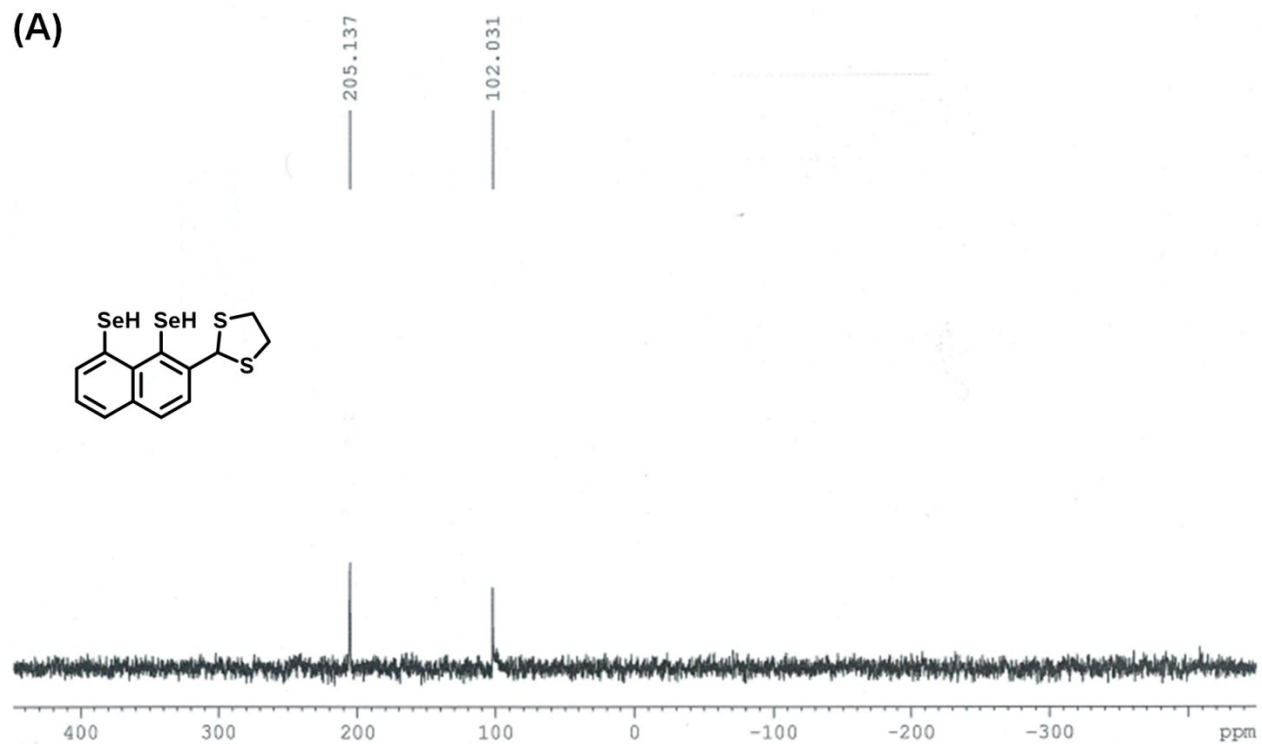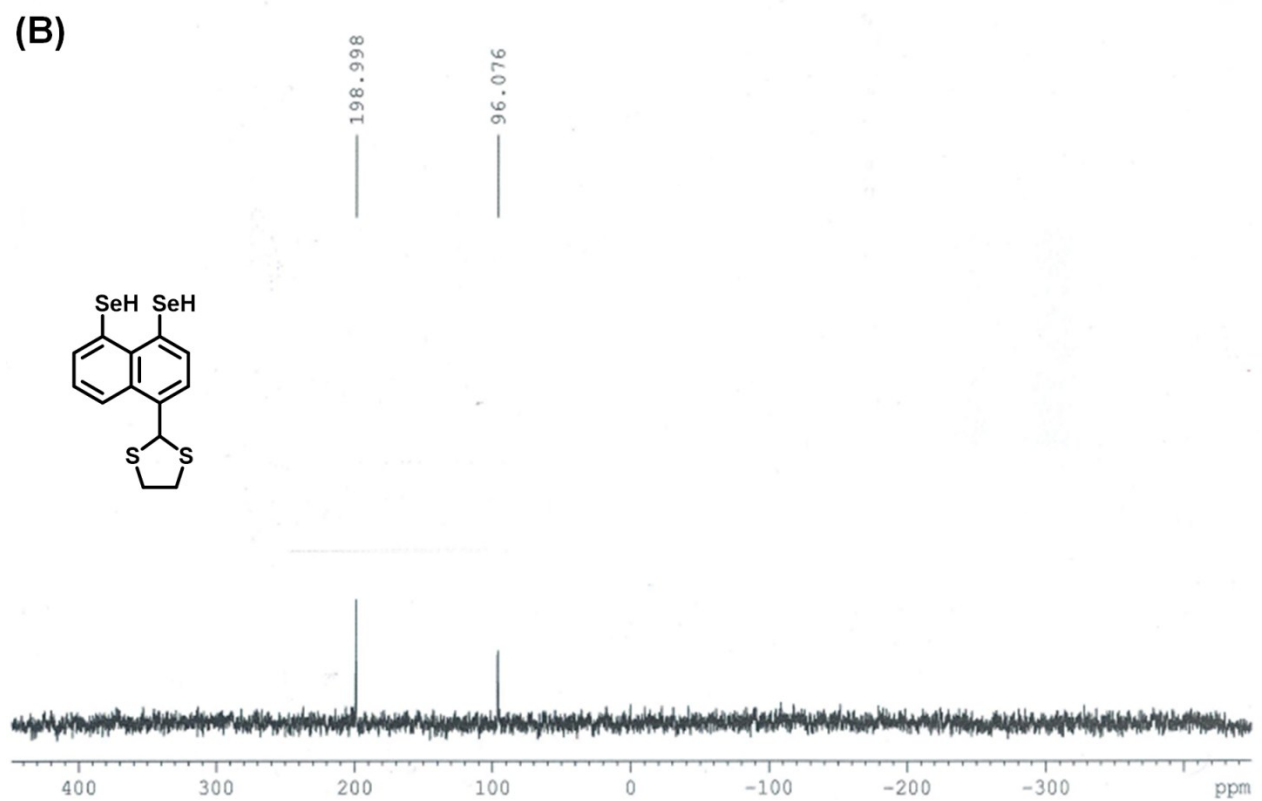

Figure S13.  $^{77}\text{Se}$  NMR spectra of **9** (A) and **10** (B) in a mixture of 1:1  $\text{CHCl}_3$  and MeOH.

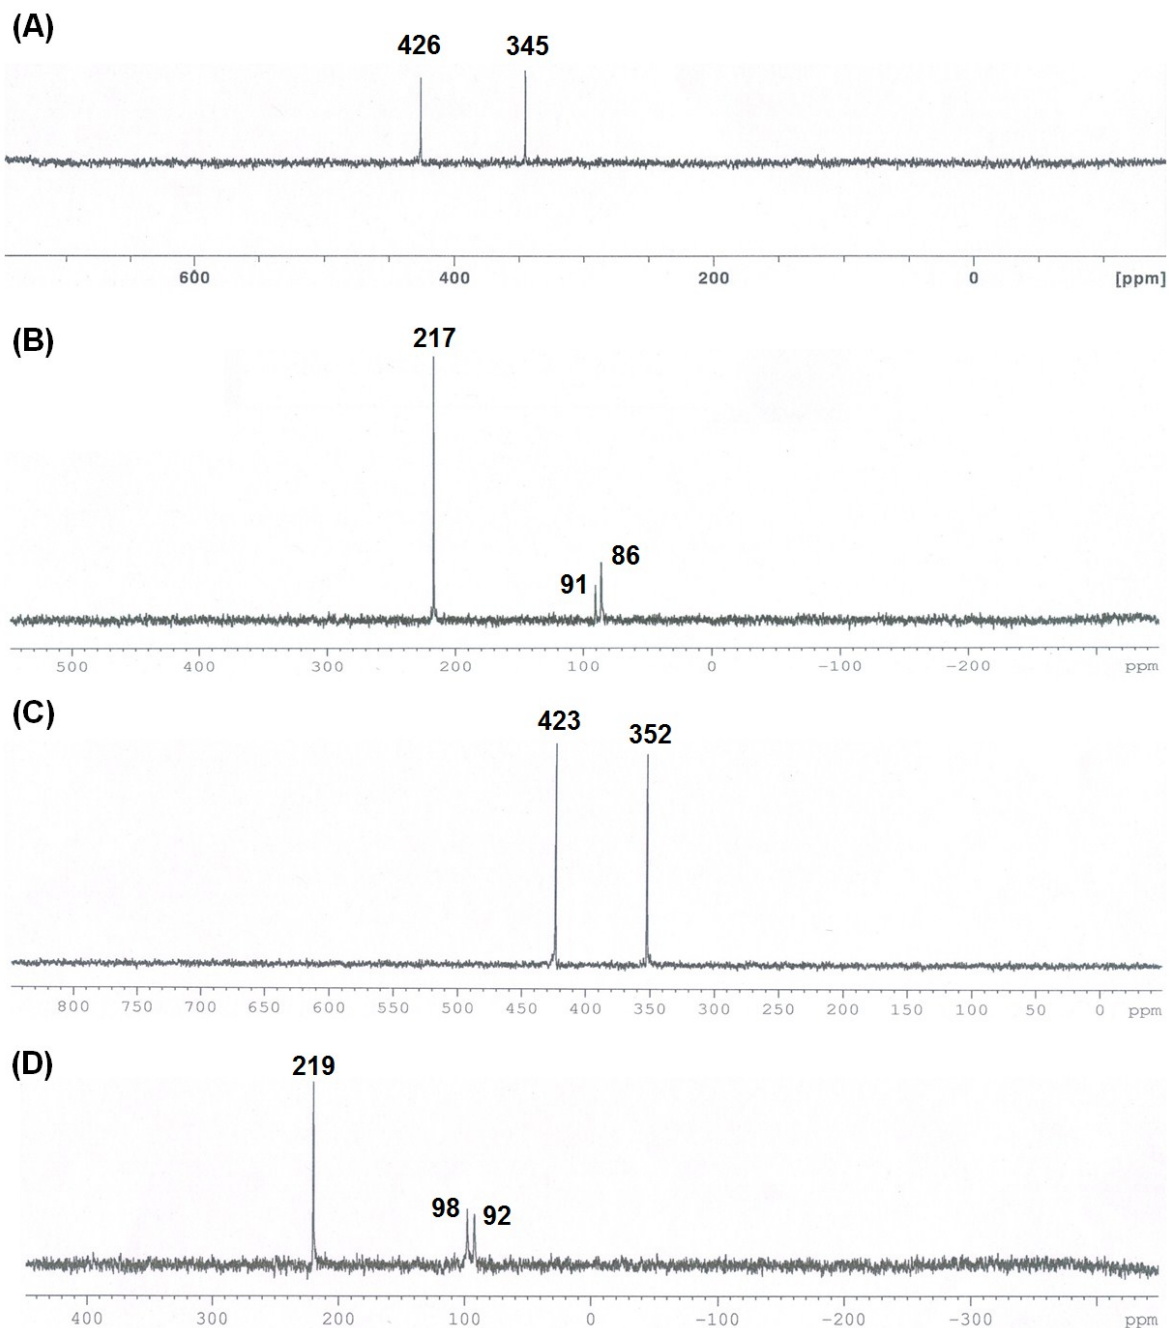

Figure S14. Reproducibility of the  $^{77}\text{Se}$  NMR of compounds **5** and **12**. (A)  $^{77}\text{Se}$  NMR spectra of compound **12** (A), and compound **5** (B) generated from compound **12** by reduction with sodium borohydride. (C) Compound **5** was then left in the NMR tube for aerial oxidation and this quantitatively regenerated compound **12** as indicated by the appearance of two peaks in the  $^{77}\text{Se}$  NMR spectra at 352 and 423 ppm corresponding to the oxidized diselenide. (D) The reaction mixture was again reduced with sodium borohydride to regenerate compound **5** and  $^{77}\text{Se}$  NMR spectra of the mixture exhibited three peaks at 219, 92 and 98 ppm, which is quite similar to that observed earlier, that is, in B.

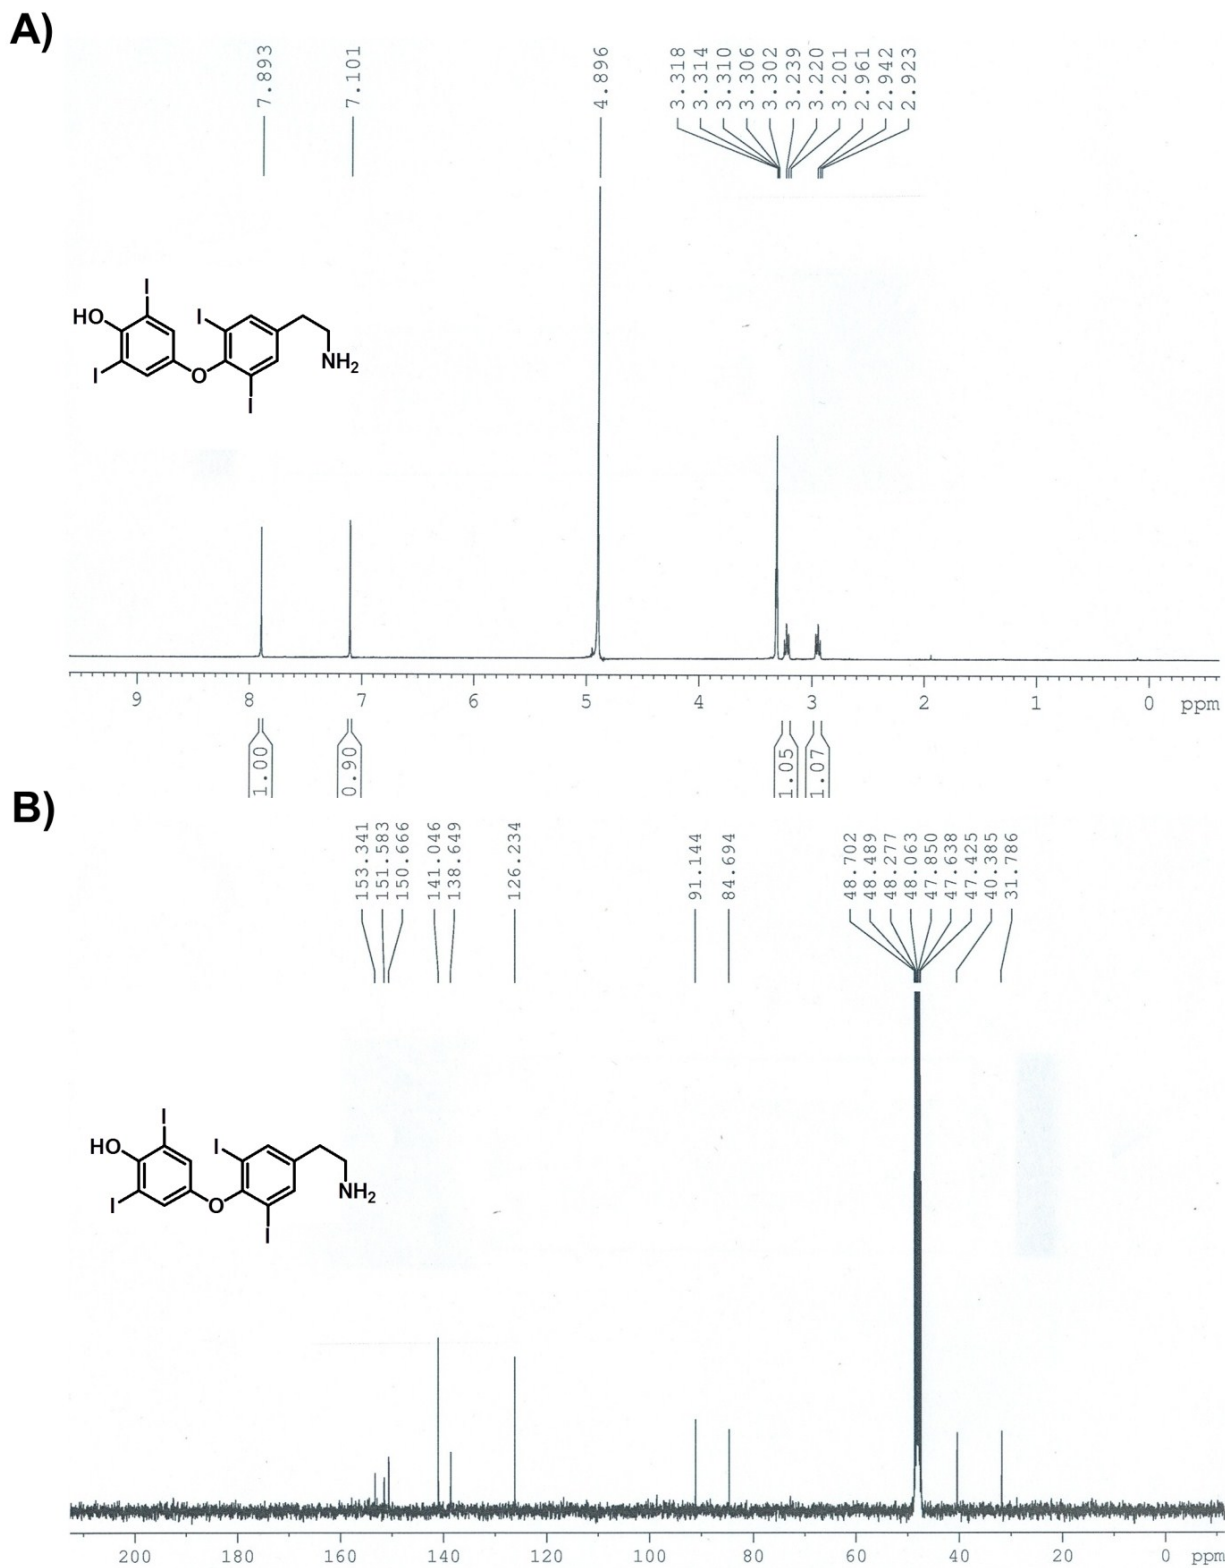

Figure S15.  $^1\text{H}$  (A) and  $^{13}\text{C}$  (B) NMR spectra of T4AM in  $d_4$ -MeOH.

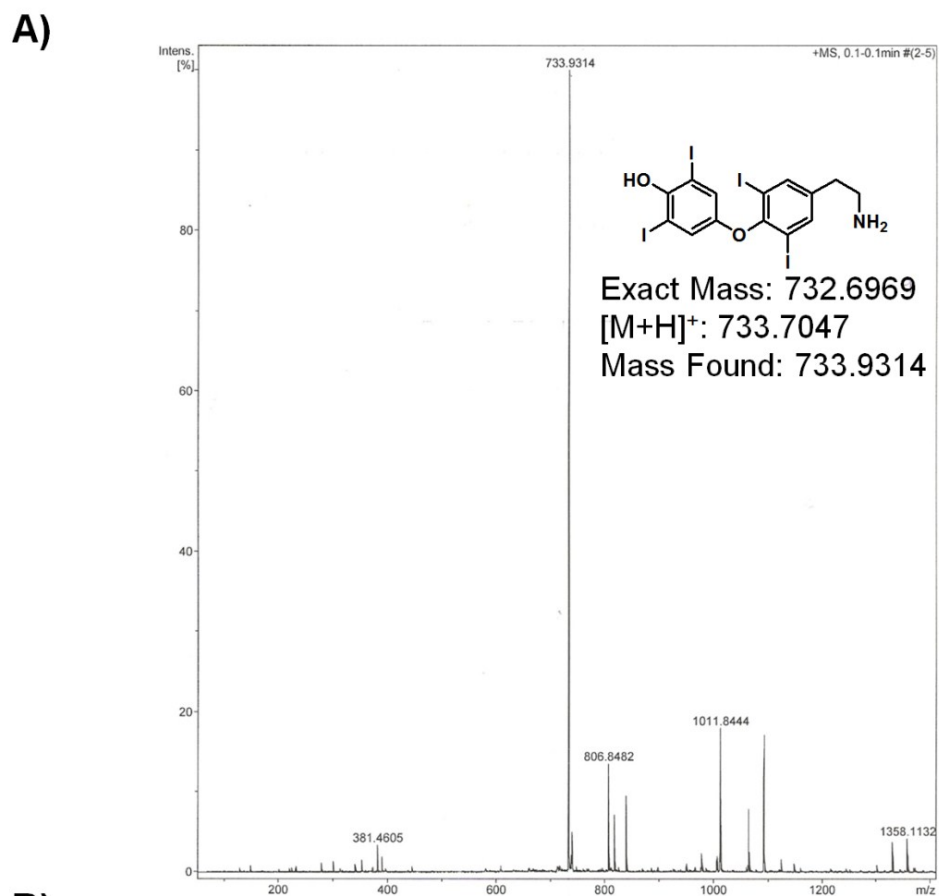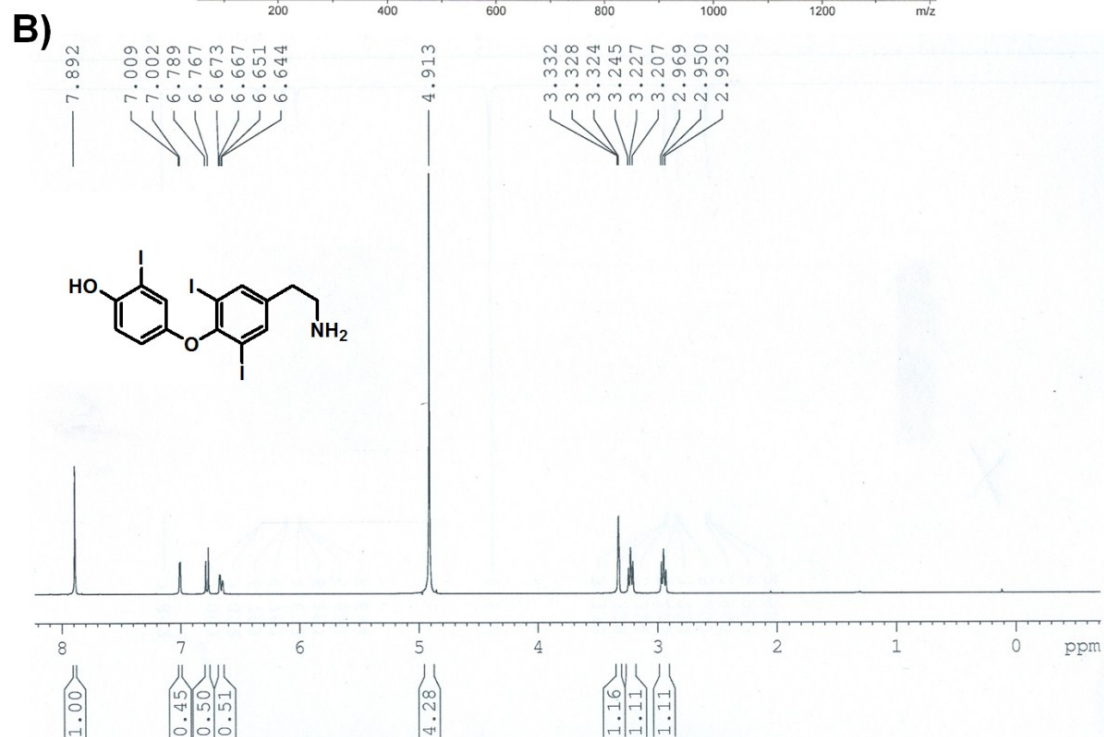

Figure S16. ESI Mass spectrum of T4AM (A) and <sup>1</sup>H NMR spectrum of T3AM in *d*<sub>4</sub>-MeOH (B).

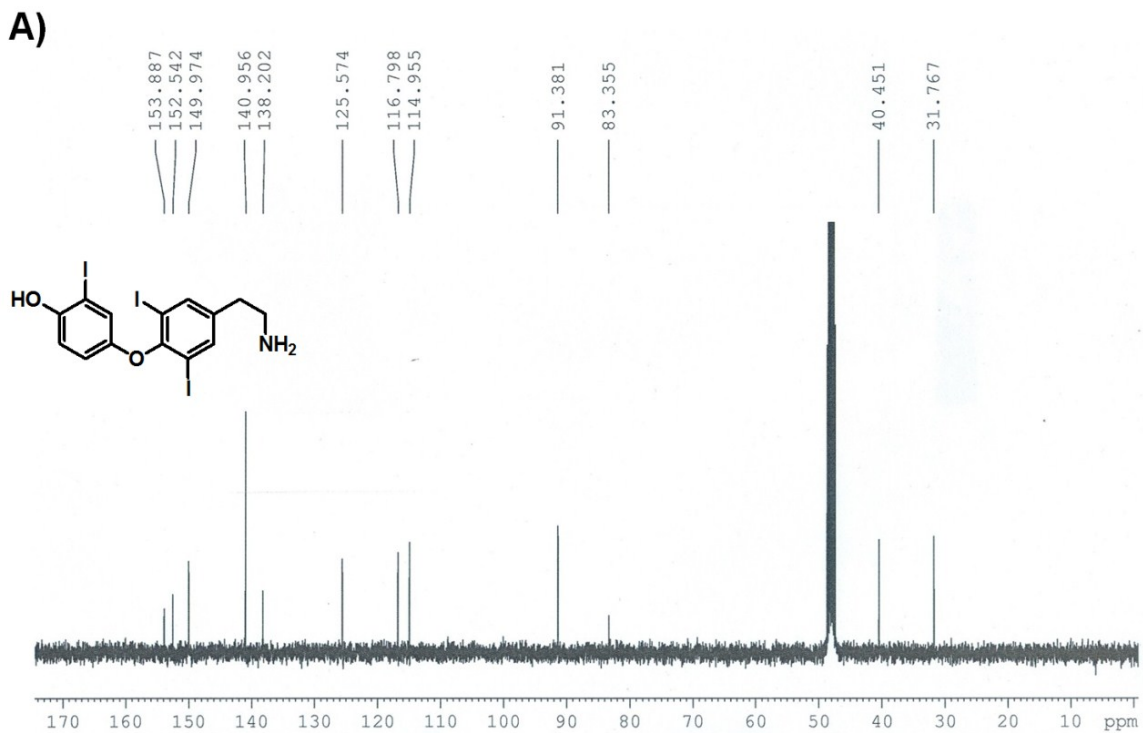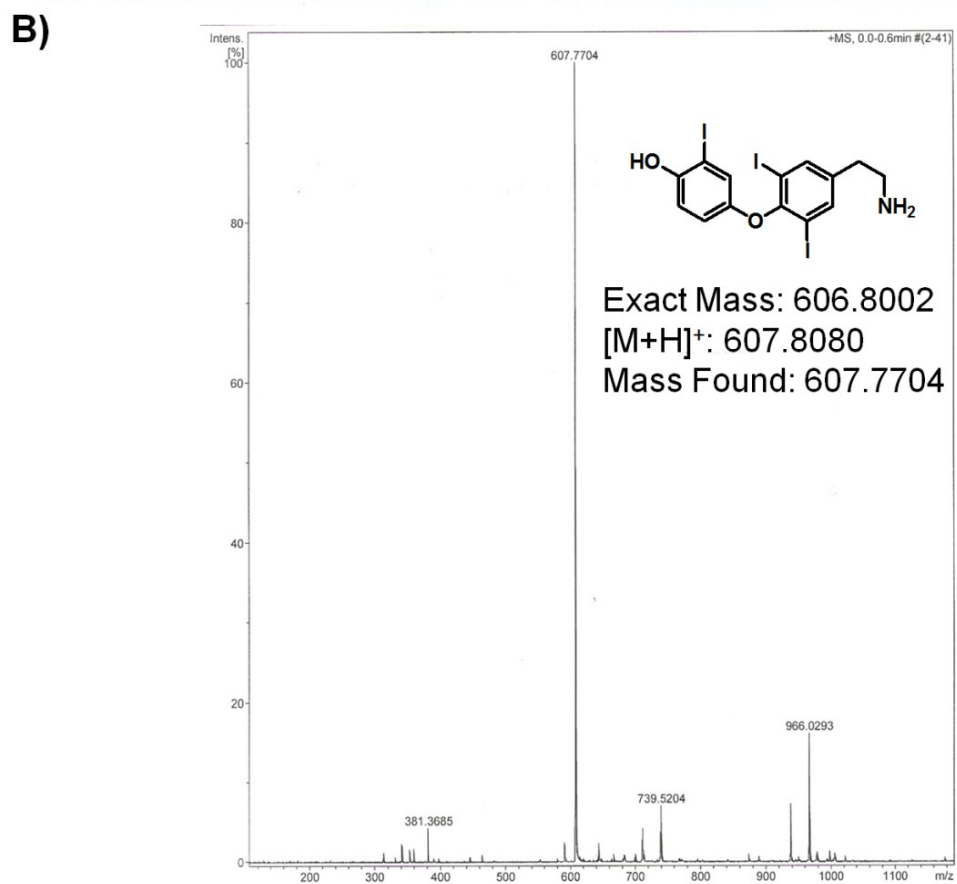

Figure S17.  $^{13}\text{C}$  NMR spectrum in  $d_4$ -MeOH (A) and ESI Mass spectrum (B) of T3AM.

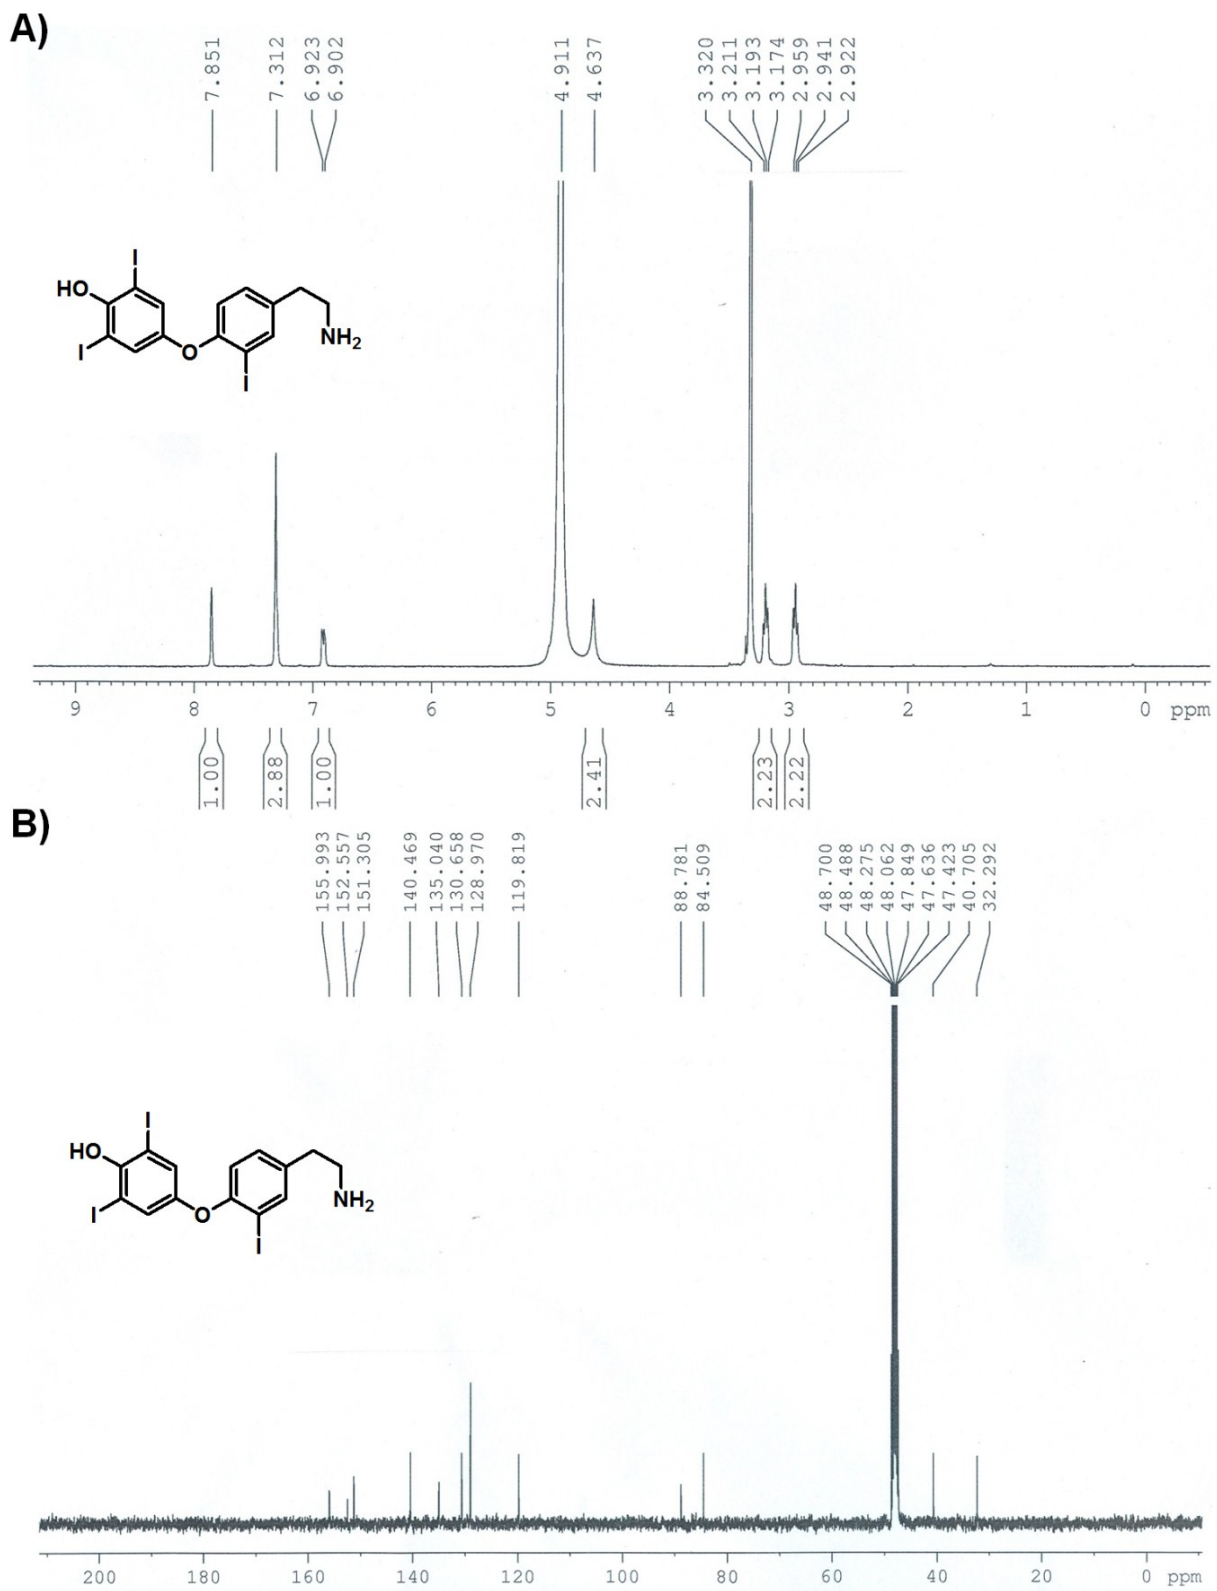

Figure S18.  $^1\text{H}$  (A) and  $^{13}\text{C}$  (B) NMR spectra of rT3AM in  $d_4$ -MeOH.



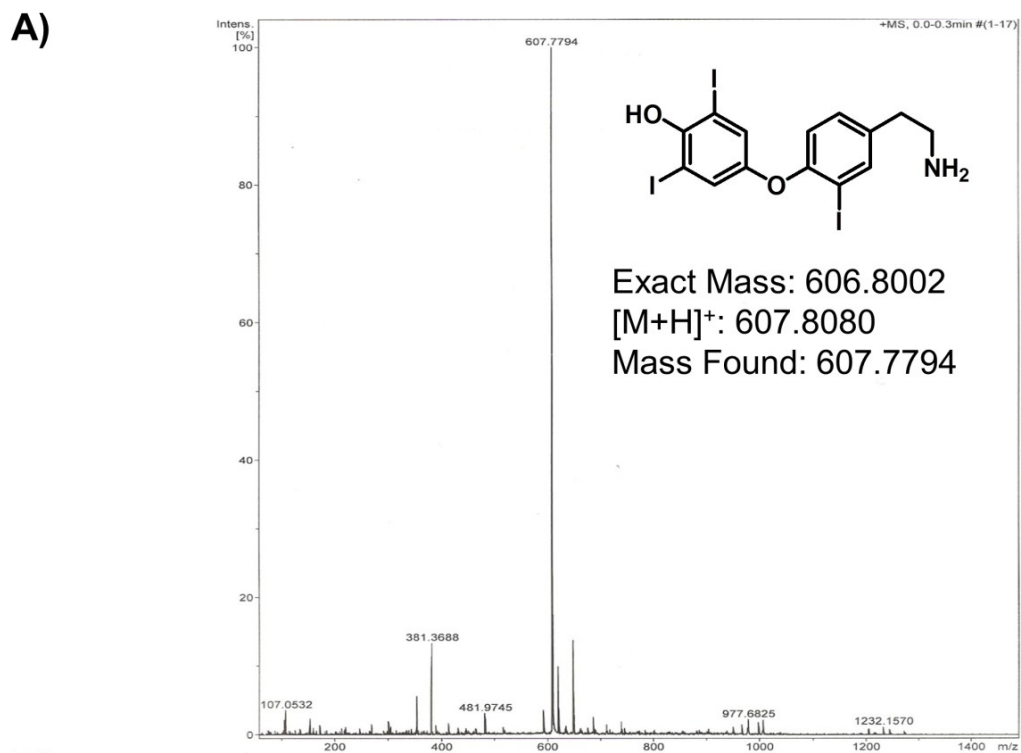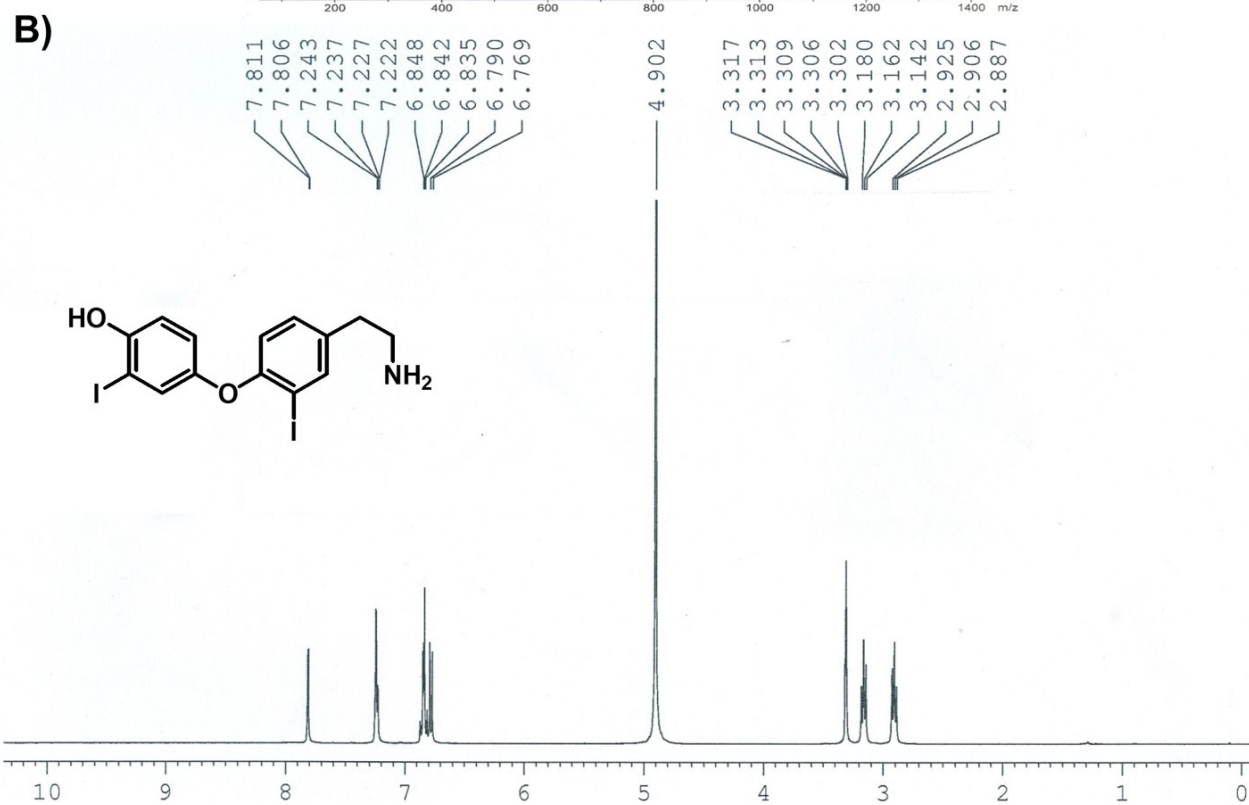

Figure S19. ESI Mass spectrum of rT3AM (A) and <sup>1</sup>H NMR spectrum of 3,3'-T2AM in *d*<sub>4</sub>-MeOH (B).

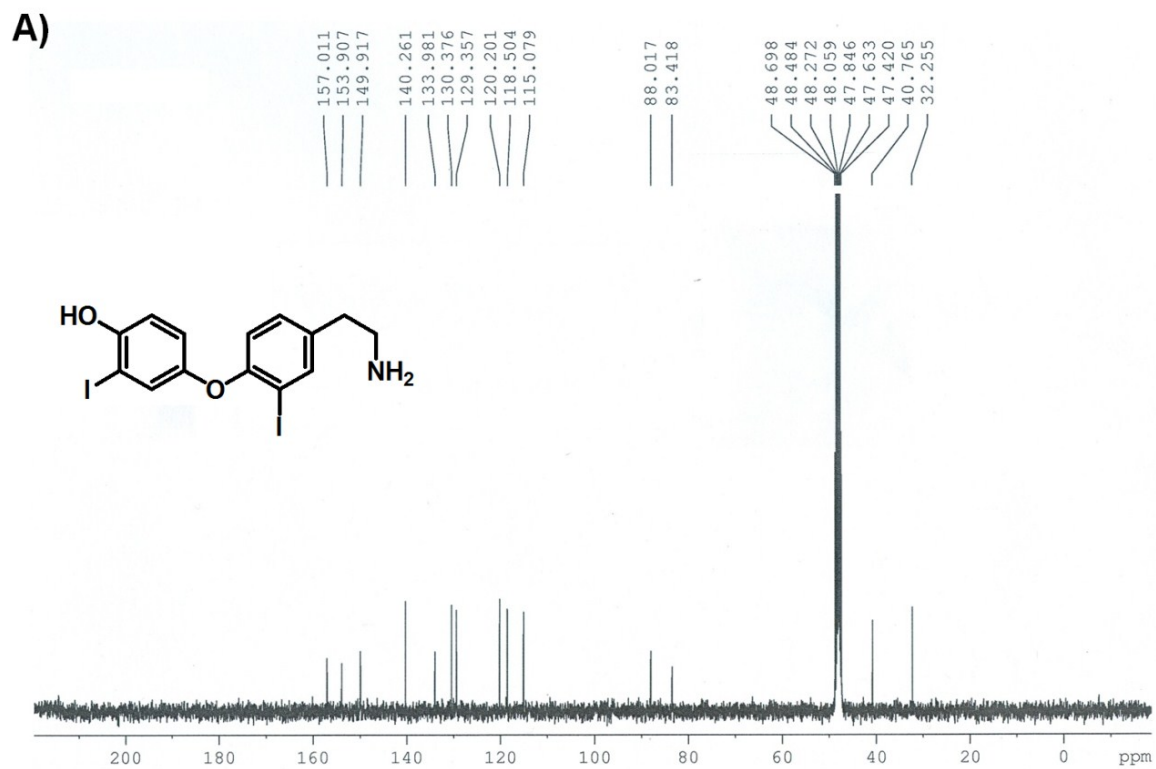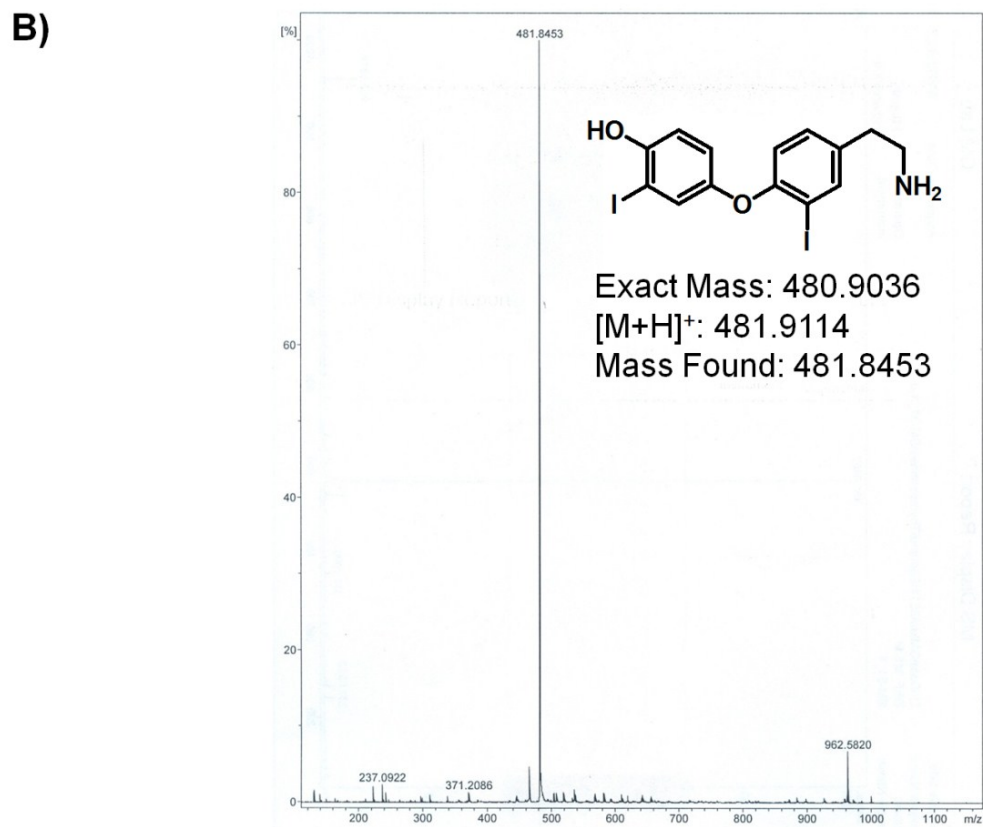

Figure S20. <sup>13</sup>C NMR in *d*<sub>4</sub>-MeOH (A) and ESI Mass spectra (B) of 3,3'-T2AM.



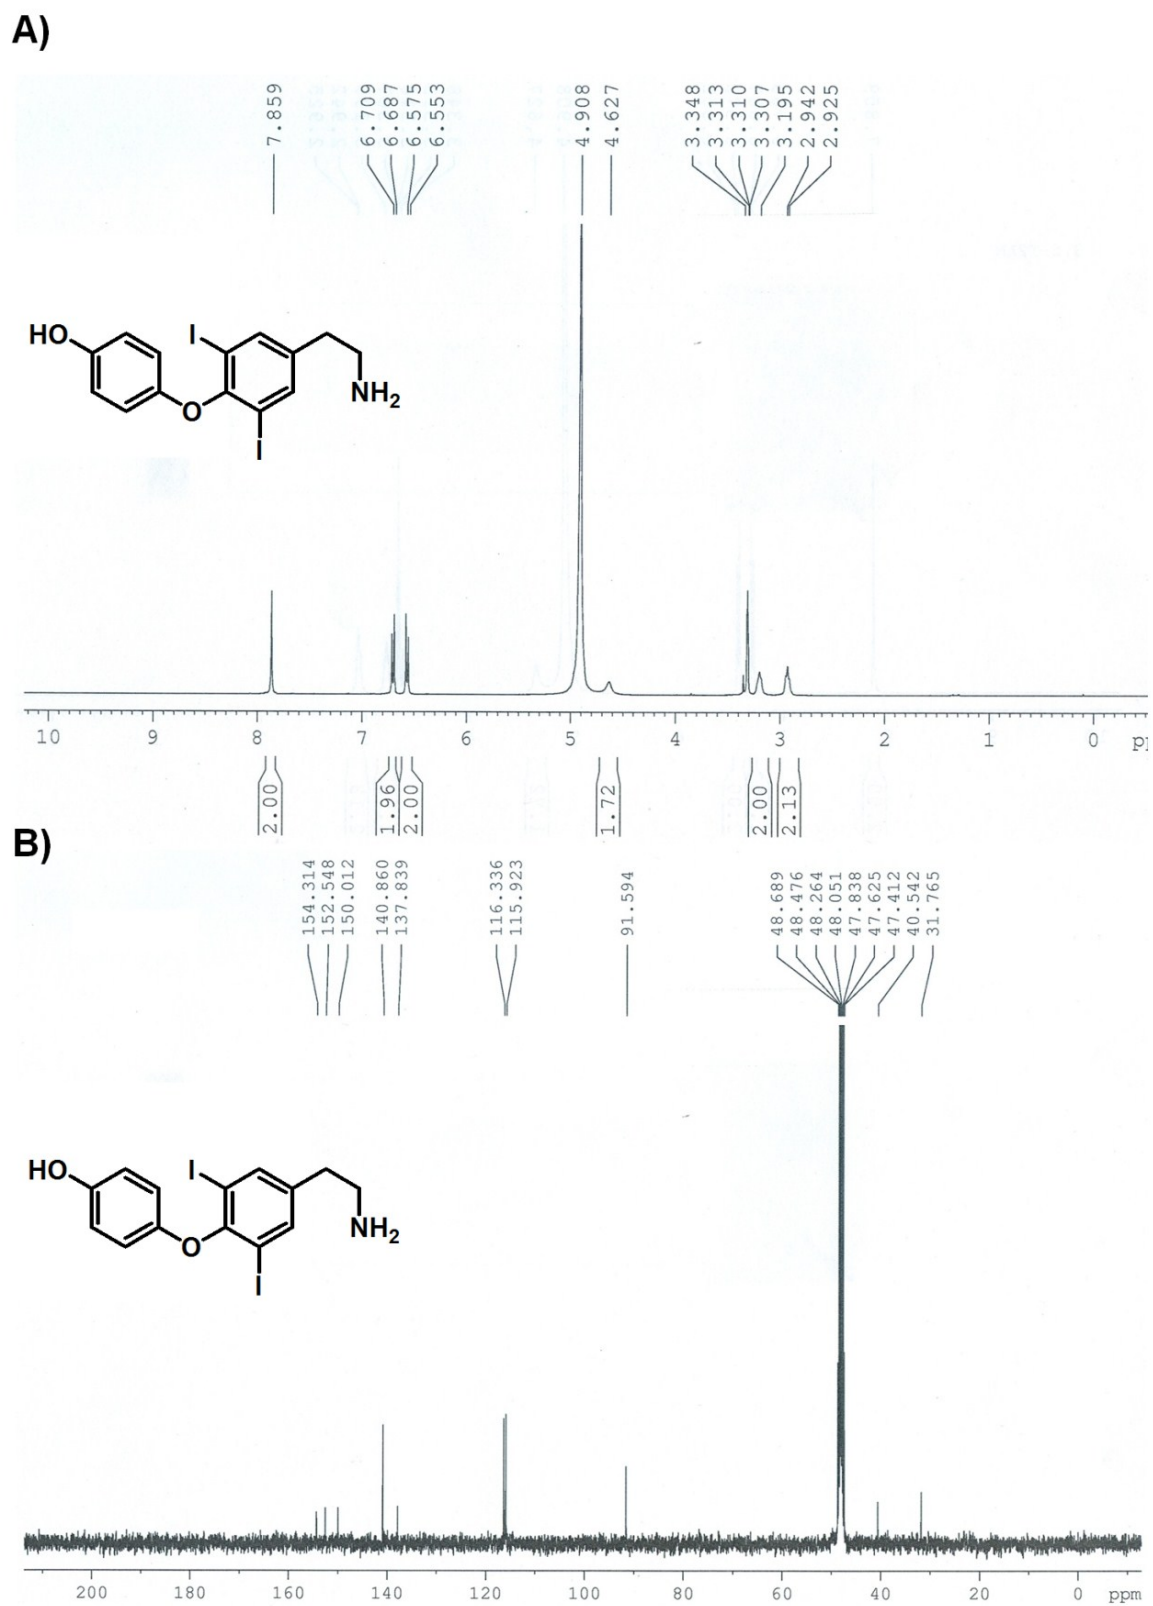

Figure S21.  $^1\text{H}$  (A) and  $^{13}\text{C}$  (B) NMR spectra of 3,5-T2AM in  $d_4$ -MeOH.

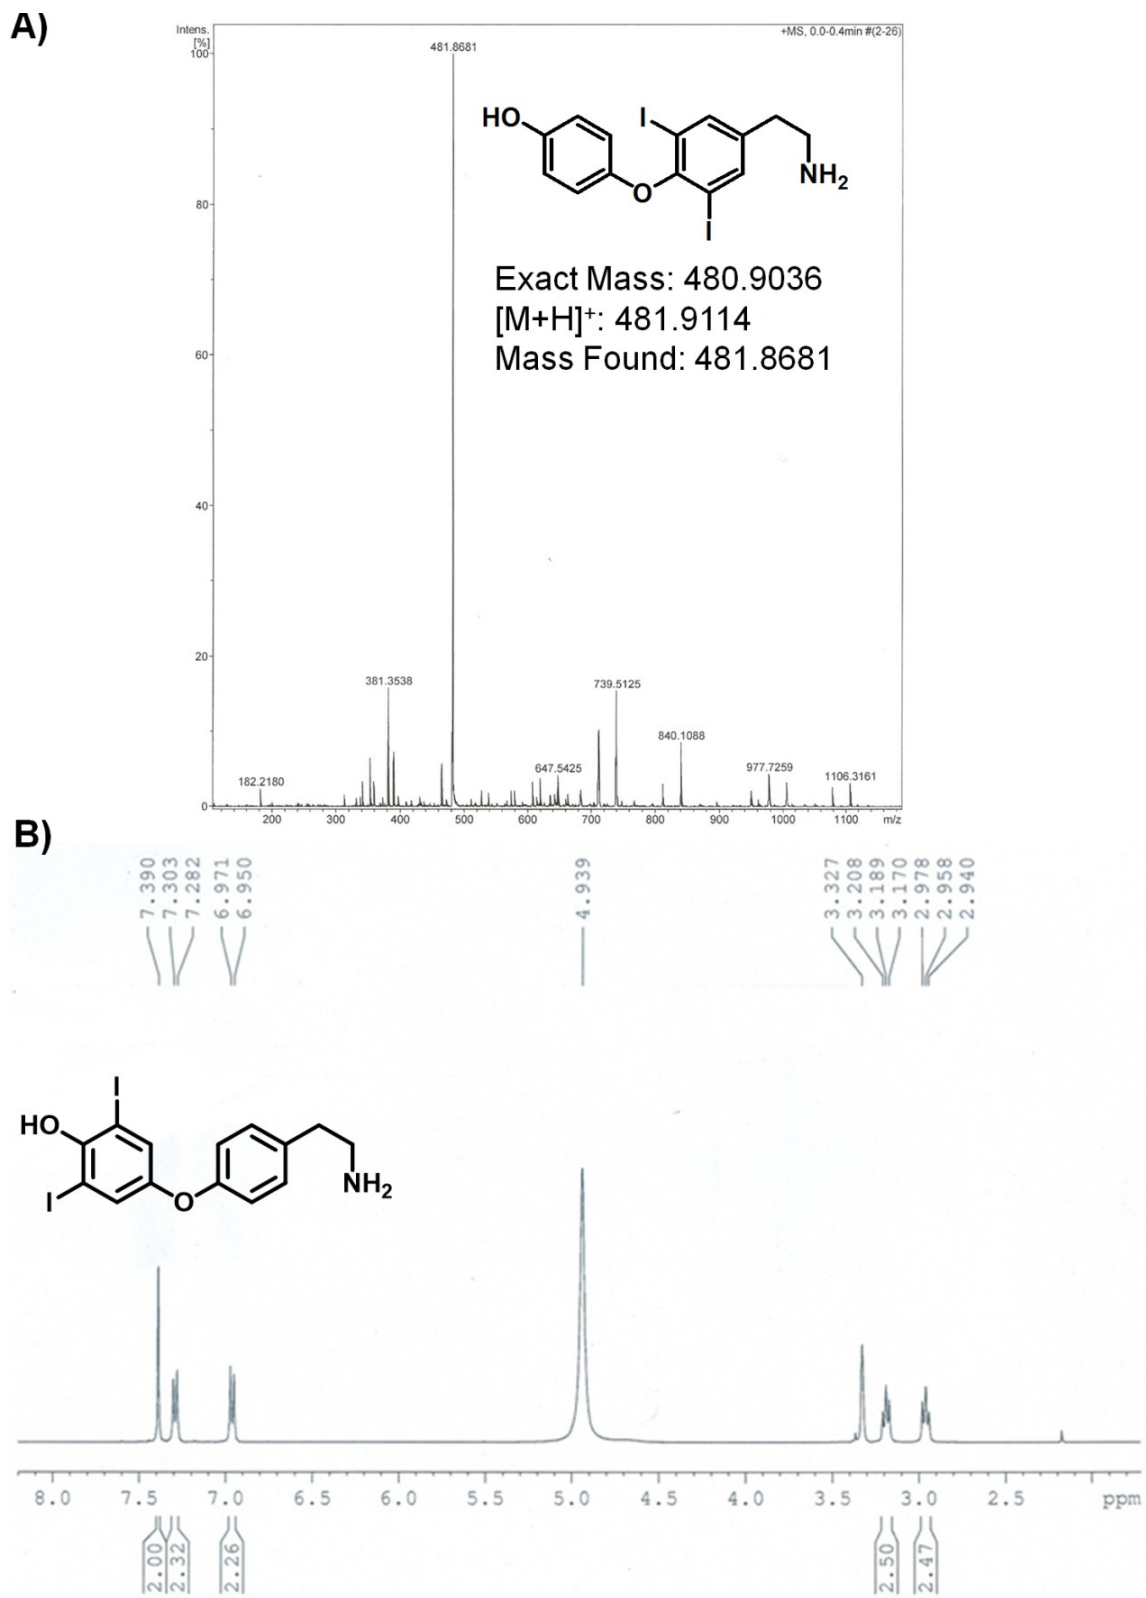

Figure S22. ESI Mass spectrum of 3,5-T2AM (A) and <sup>1</sup>H NMR spectrum of 3',5'-T2AM in *d*<sub>4</sub>-MeOH (B).

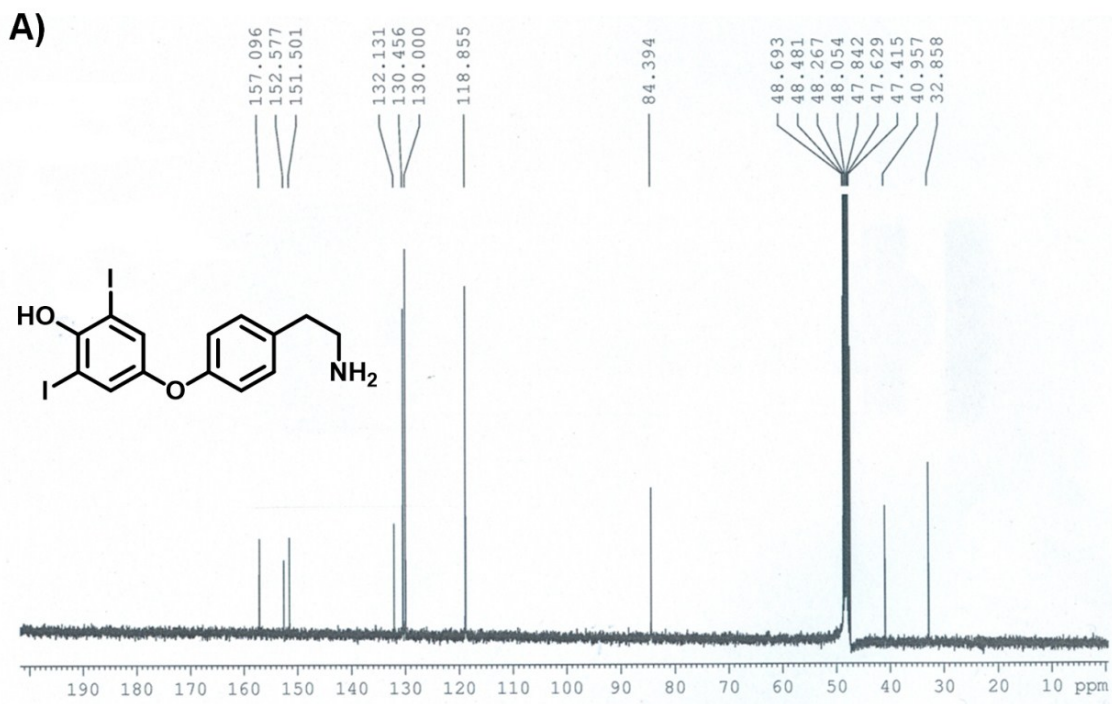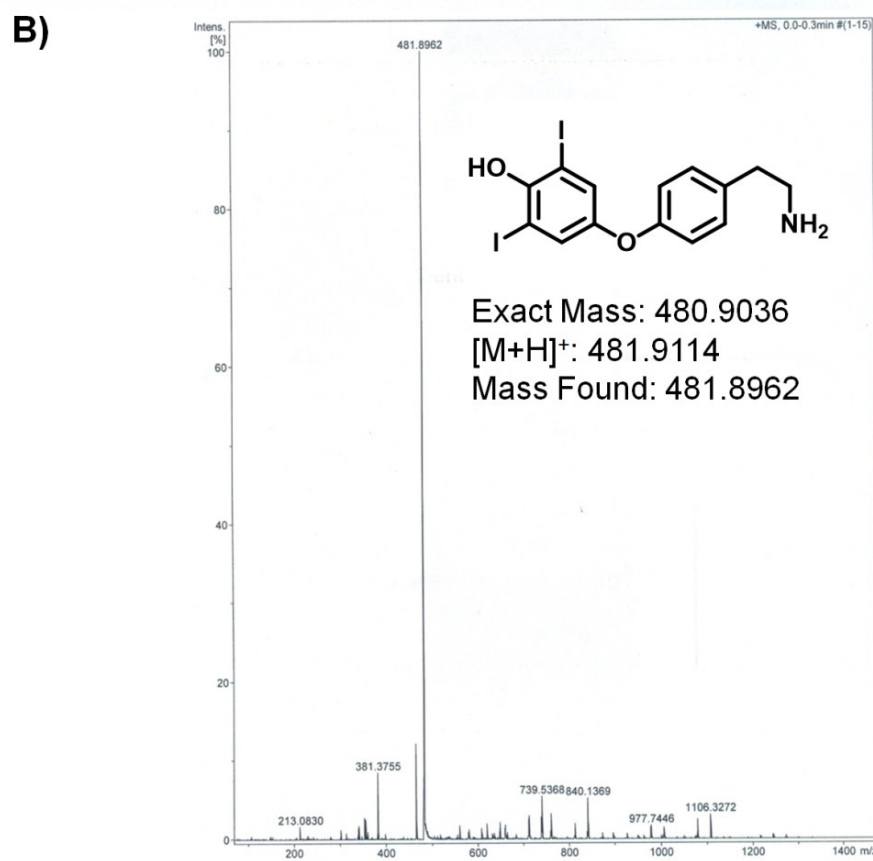

Figure S23. <sup>13</sup>C NMR spectrum in *d*<sub>4</sub>-MeOH (A) and ESI Mass spectrum (B) of 3',5'-T2AM.

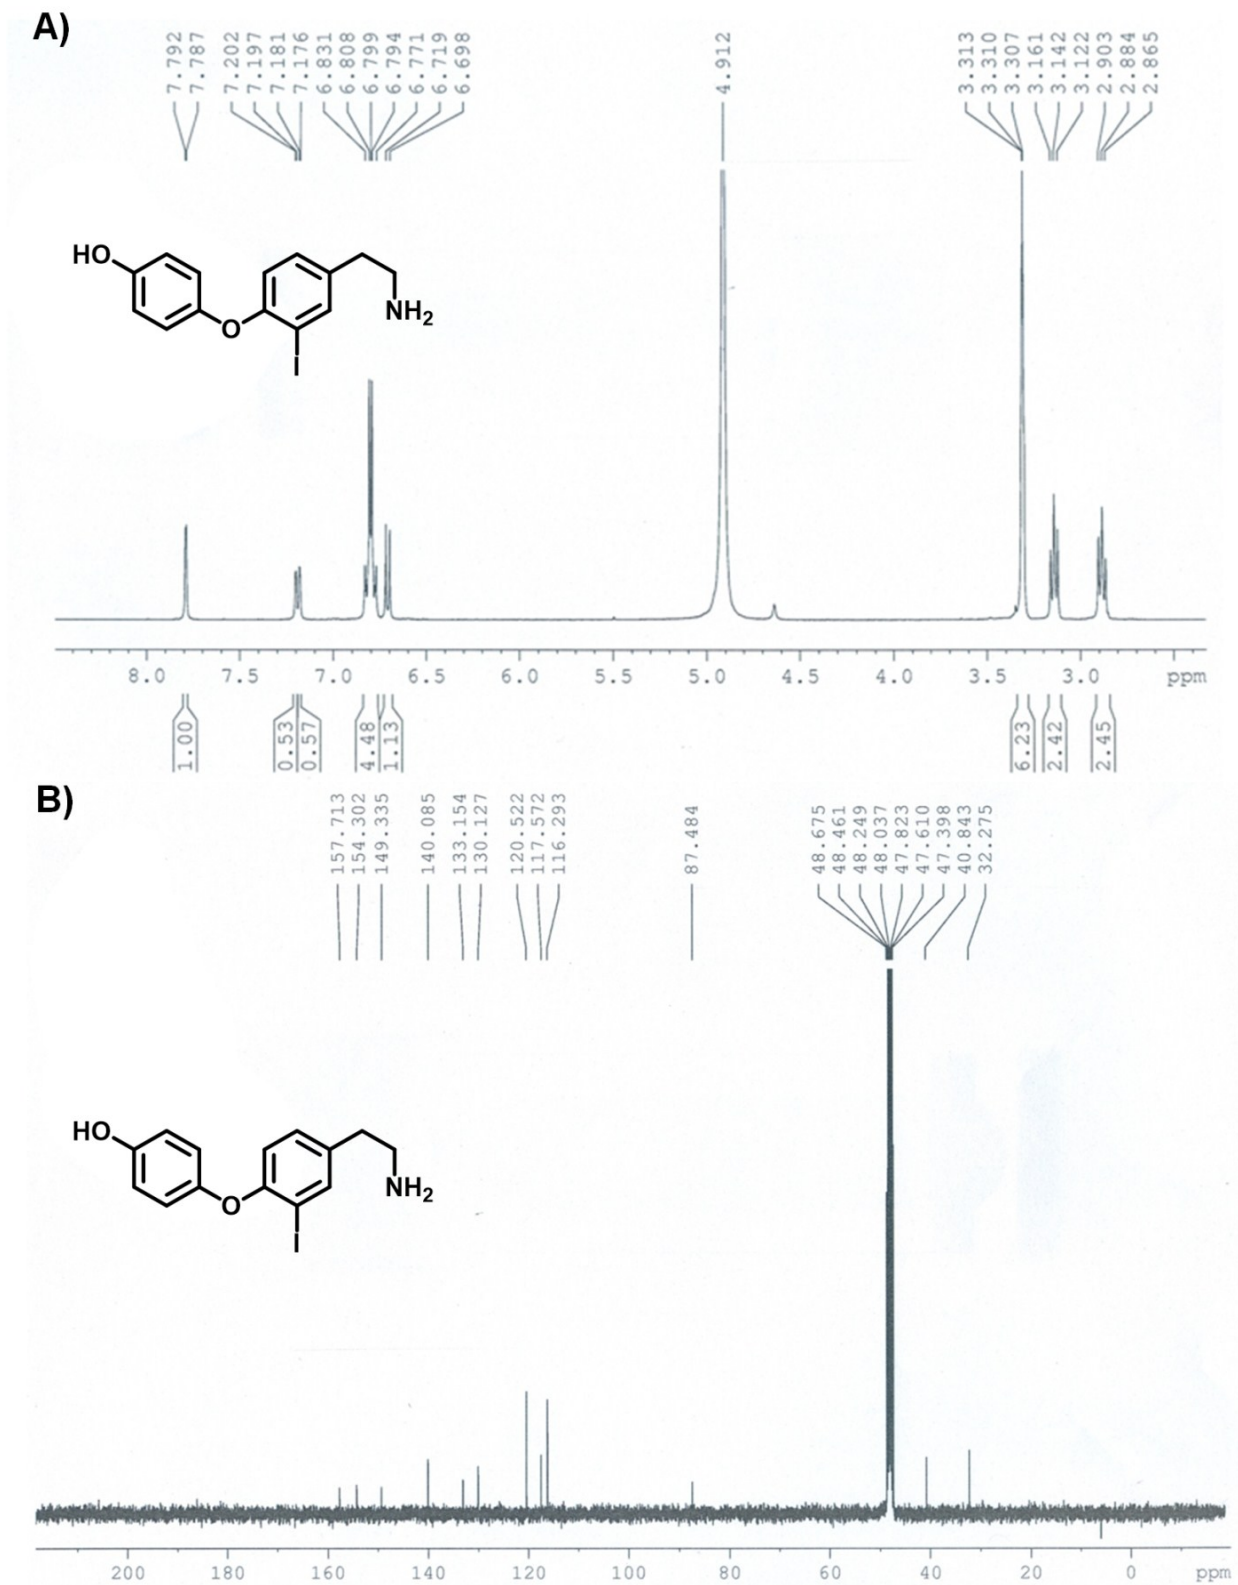

Figure S24. <sup>1</sup>H (A) and <sup>13</sup>C NMR (B) spectra of 3-T1AM in *d*<sub>4</sub>-MeOH.

A)

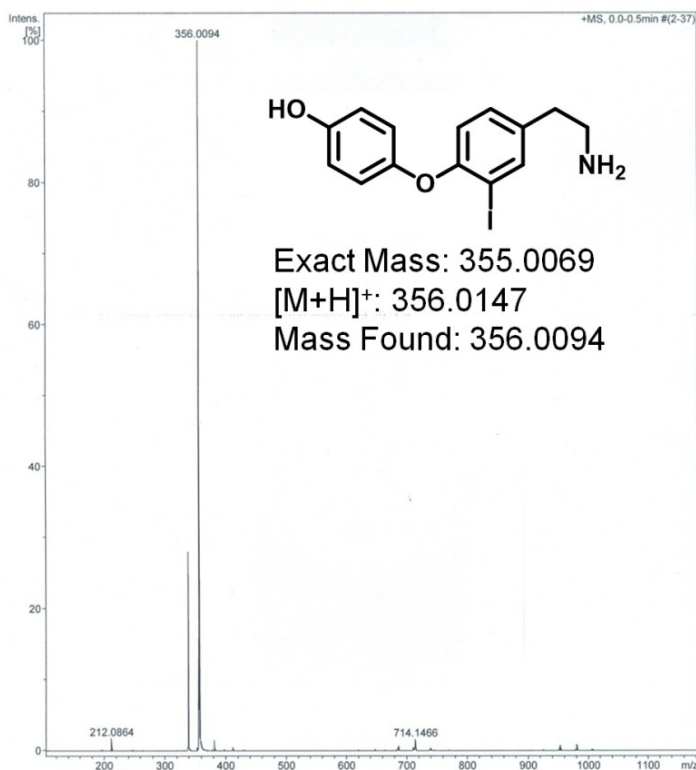

B)

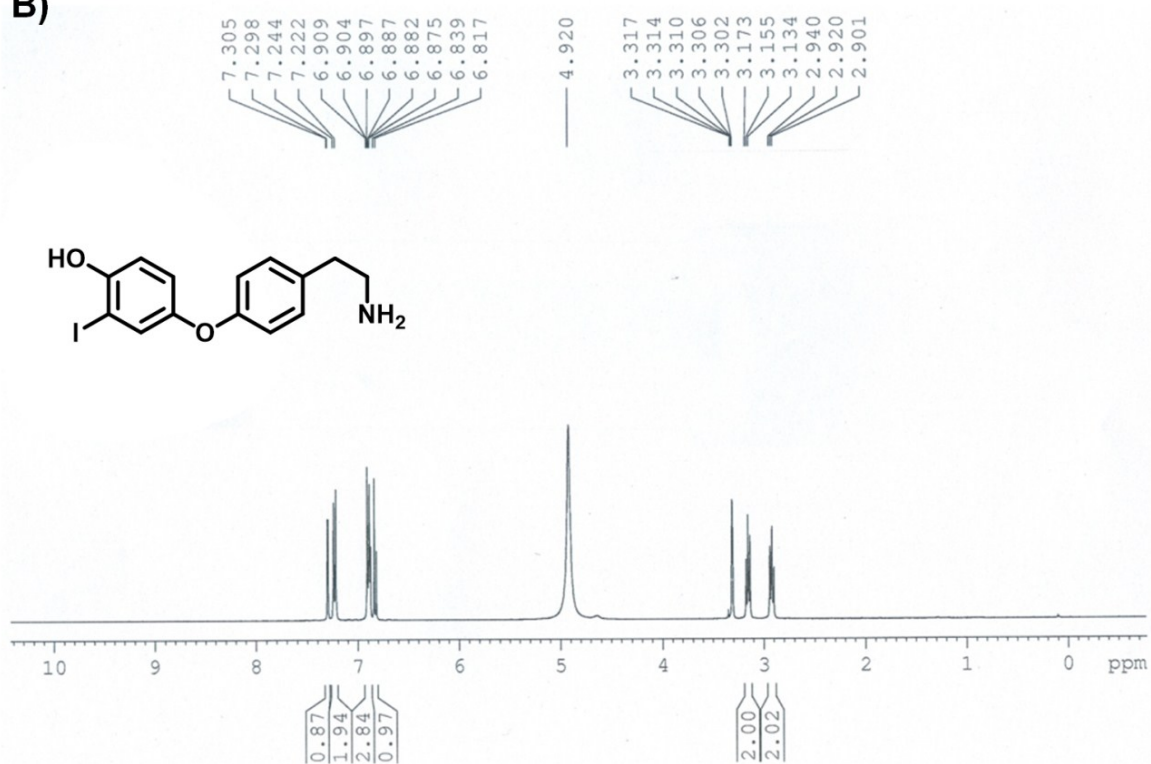

Figure S25. ESI Mass spectrum of 3-T1AM (A) and <sup>1</sup>H NMR spectrum of 3'-T1AM in *d*<sub>4</sub>-MeOH (B).



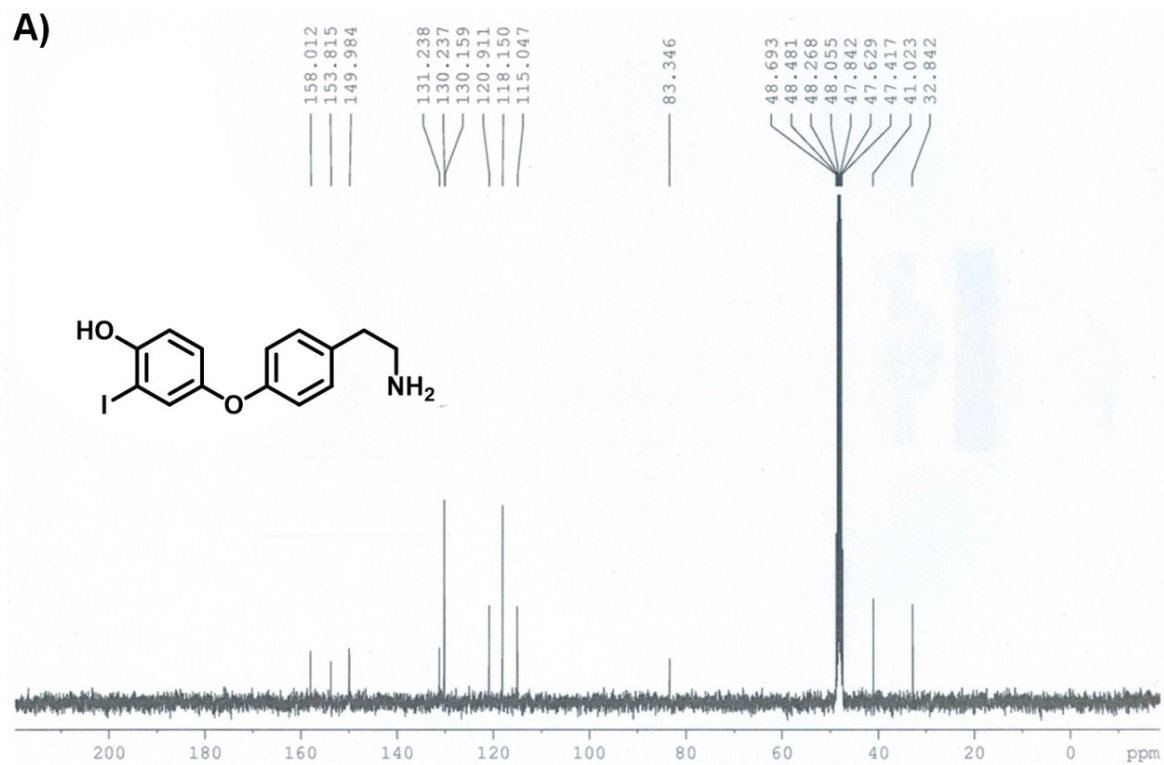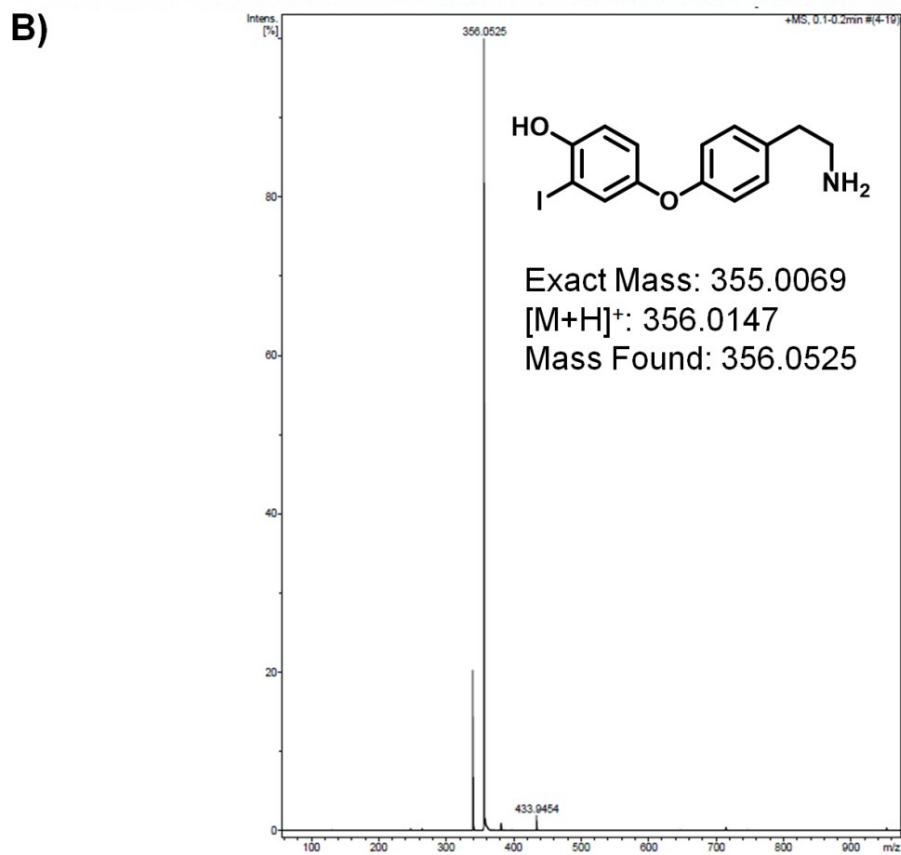

Figure S26. <sup>13</sup>C NMR spectrum in *d*<sub>4</sub>-MeOH (A) and ESI Mass spectrum (B) of 3'-T1AM.

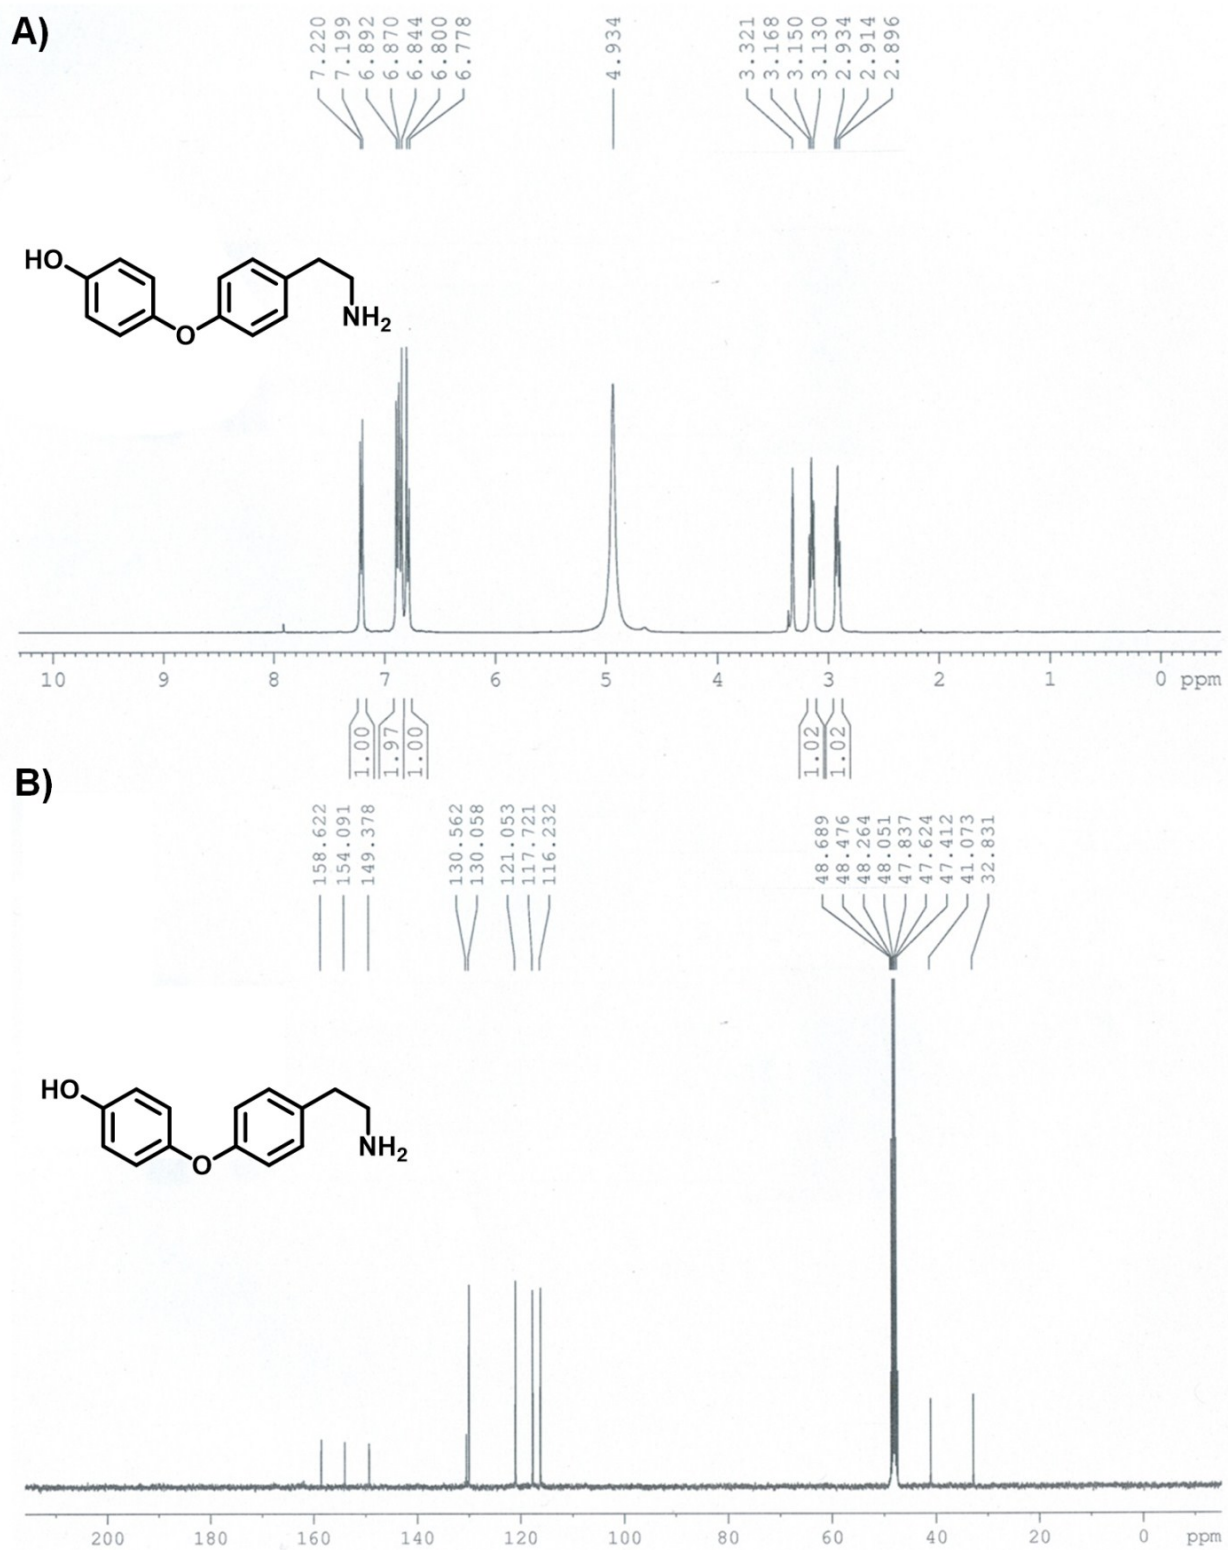

Figure S27.  $^1\text{H}$  (A) and  $^{13}\text{C}$  (B) NMR spectrum of T0AM in  $d_4$ -MeOH.

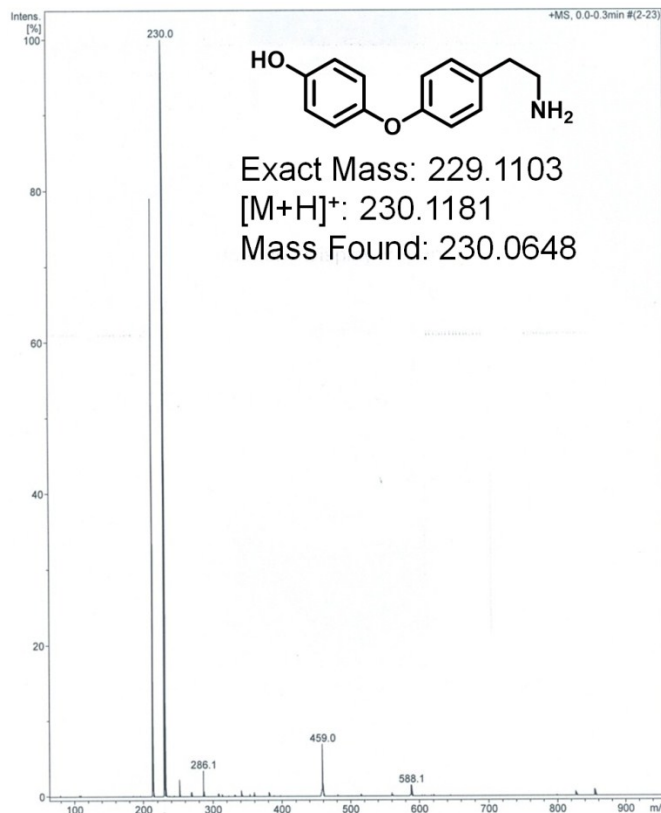

Figure S28. ESI Mass spectrum of T0AM.

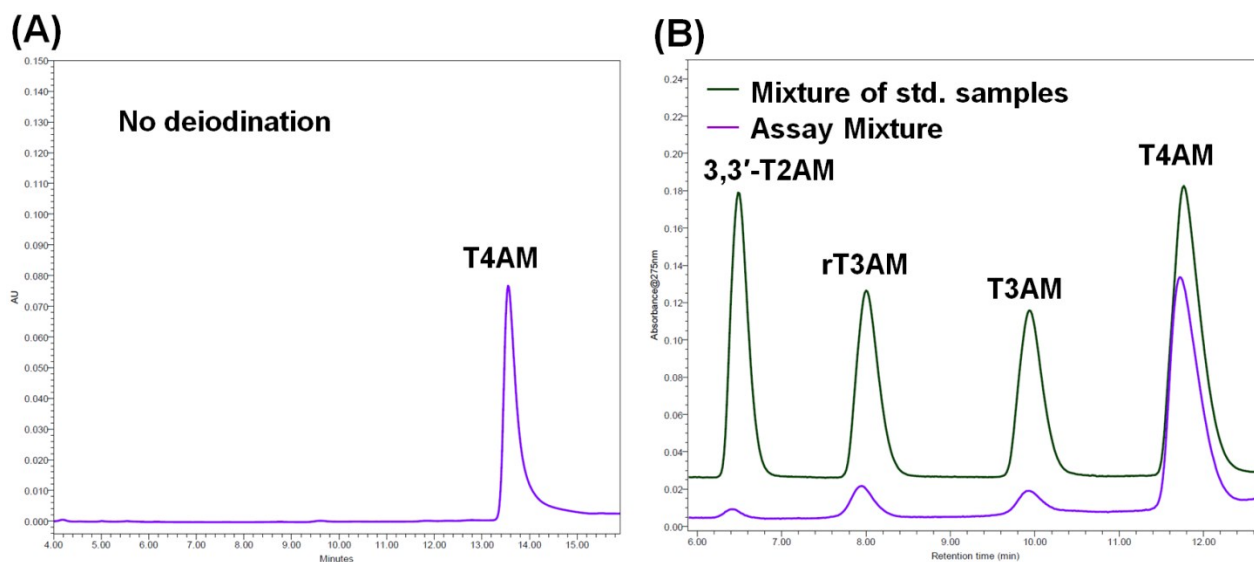

Figure S29. HPLC chromatogram for the deiodination of T4AM in a mixture of phosphate buffer and 20% (v/v) acetonitrile (A), and in acetonitrile (B) by compound **3**. In acetonitrile, T4AM undergoes both the tyrosyl and phenolic ring deiodination to produce rT3AM and T3AM, respectively, by **3**.



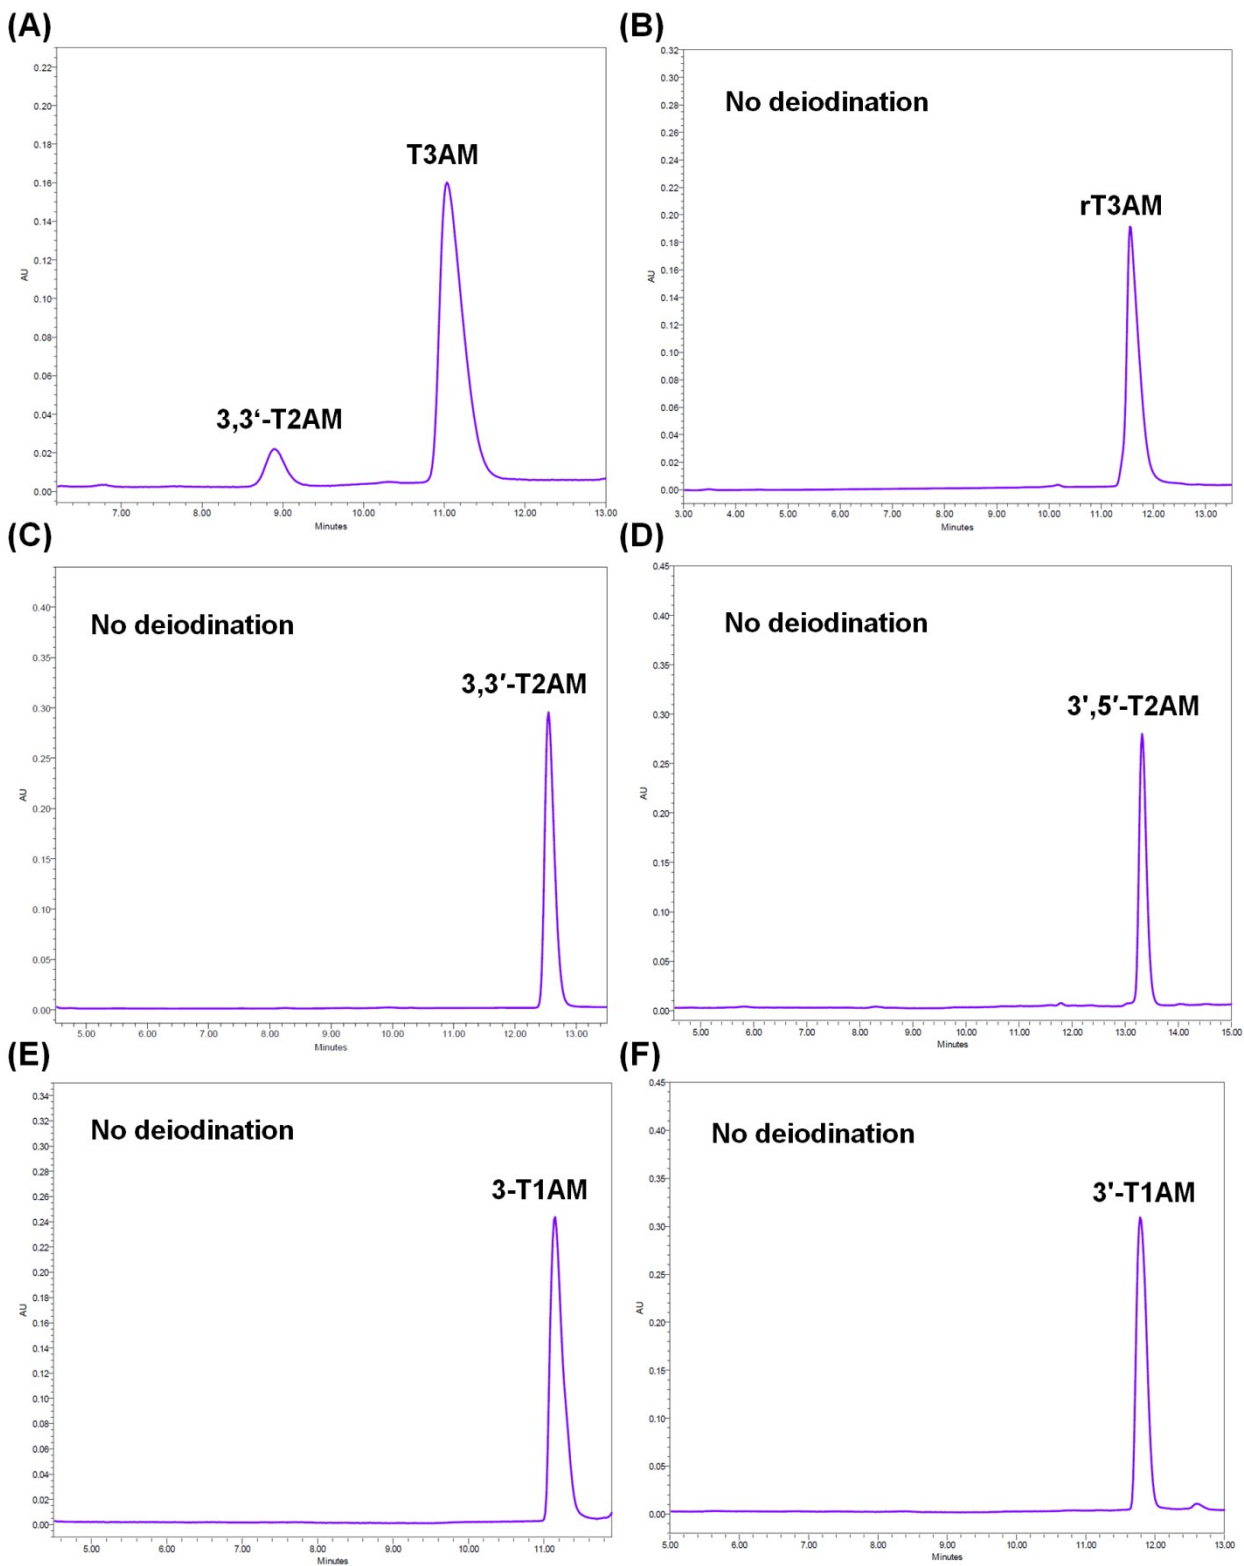

Figure S30. HPLC chromatograms of deiodination of T3AM (A), rT3AM (B), 3,3'-T2AM (C), 3',5'-T2AM (D), 3-T1AM (E), 3'-T1AM (F) by compound **8**.

Table S03. Coordinates of optimized geometries discussed in this paper.

| 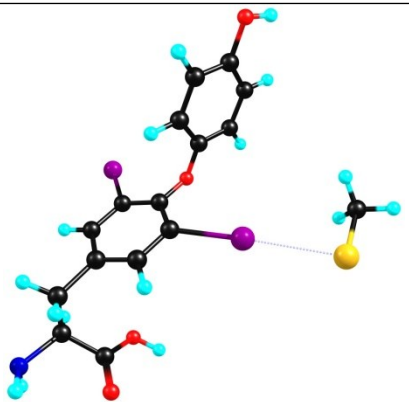 |              |              |              |  |              |              |              |
|-----------------------------------------------------------------------------------|--------------|--------------|--------------|------------------------------------------------------------------------------------|--------------|--------------|--------------|
| <b>3,5-T2·MeSe<sup>-</sup>_trans</b>                                              |              |              |              | <b>3,5-T2·MeSe<sup>-</sup>_cis</b>                                                 |              |              |              |
| 6                                                                                 | -2.763251000 | -0.867107000 | 0.980146000  | 6                                                                                  | -2.403106000 | -1.791351000 | -0.553834000 |
| 6                                                                                 | -1.431644000 | -1.287868000 | 0.907290000  | 6                                                                                  | -1.017190000 | -1.919820000 | -0.409672000 |
| 6                                                                                 | -0.428769000 | -0.504099000 | 0.336242000  | 6                                                                                  | -0.150523000 | -0.832466000 | -0.500534000 |
| 53                                                                                | 1.666302000  | -1.475592000 | 0.062453000  | 53                                                                                 | 2.130871000  | -1.278635000 | -0.403593000 |
| 6                                                                                 | -0.768979000 | 0.760225000  | -0.147762000 | 6                                                                                  | -0.695911000 | 0.433704000  | -0.730046000 |
| 8                                                                                 | 0.161437000  | 1.563947000  | -0.786630000 | 8                                                                                  | 0.110380000  | 1.548698000  | -0.891993000 |
| 6                                                                                 | -2.095399000 | 1.194705000  | -0.076250000 | 6                                                                                  | -2.075204000 | 0.572209000  | -0.898870000 |
| 6                                                                                 | -3.091062000 | 0.395582000  | 0.476913000  | 6                                                                                  | -2.930393000 | -0.524329000 | -0.817517000 |
| 6                                                                                 | -3.845057000 | -1.761887000 | 1.544755000  | 6                                                                                  | -3.310268000 | -2.995438000 | -0.421526000 |
| 6                                                                                 | -4.618384000 | -2.600322000 | 0.492028000  | 6                                                                                  | -3.662108000 | -3.388947000 | 1.035257000  |
| 1                                                                                 | -5.037985000 | -1.923063000 | -0.255177000 | 1                                                                                  | -2.736322000 | -3.573402000 | 1.583425000  |
| 6                                                                                 | 1.104143000  | 2.246715000  | -0.048972000 | 6                                                                                  | 0.702821000  | 2.132143000  | 0.206733000  |
| 6                                                                                 | 2.156964000  | 2.808740000  | -0.767717000 | 6                                                                                  | 1.730359000  | 3.035350000  | -0.055844000 |
| 6                                                                                 | 3.131159000  | 3.553340000  | -0.110795000 | 6                                                                                  | 2.354762000  | 3.705178000  | 0.991170000  |
| 1                                                                                 | 3.952518000  | 3.983077000  | -0.677848000 | 1                                                                                  | 3.160252000  | 4.402896000  | 0.778635000  |
| 6                                                                                 | 3.063184000  | 3.734147000  | 1.270419000  | 6                                                                                  | 1.961799000  | 3.468916000  | 2.308296000  |
| 8                                                                                 | 4.005931000  | 4.463622000  | 1.969816000  | 8                                                                                  | 2.551636000  | 4.106368000  | 3.383393000  |
| 6                                                                                 | 2.012906000  | 3.170345000  | 1.987024000  | 6                                                                                  | 0.937511000  | 2.564790000  | 2.569175000  |
| 6                                                                                 | 1.031589000  | 2.430498000  | 1.330922000  | 6                                                                                  | 0.304585000  | 1.898720000  | 1.522065000  |
| 1                                                                                 | -1.166597000 | -2.270857000 | 1.289645000  | 1                                                                                  | -0.593573000 | -2.907154000 | -0.240558000 |
| 53                                                                                | -2.651447000 | 3.125297000  | -0.851238000 | 53                                                                                 | -2.935128000 | 2.502425000  | -1.318835000 |
| 1                                                                                 | -4.112700000 | 0.753978000  | 0.517127000  | 1                                                                                  | -3.995993000 | -0.392829000 | -0.959931000 |
| 1                                                                                 | -4.600815000 | -1.169894000 | 2.067559000  | 1                                                                                  | -2.838727000 | -3.876489000 | -0.863889000 |
| 1                                                                                 | -3.413462000 | -2.454039000 | 2.275473000  | 1                                                                                  | -4.248639000 | -2.823828000 | -0.959601000 |
| 1                                                                                 | 2.208176000  | 2.643805000  | -1.836651000 | 1                                                                                  | 2.039841000  | 3.191536000  | -1.081594000 |
| 1                                                                                 | 1.973636000  | 3.305524000  | 3.061352000  | 1                                                                                  | 0.647324000  | 2.377481000  | 3.596187000  |
| 1                                                                                 | 0.224629000  | 1.982736000  | 1.895852000  | 1                                                                                  | -0.480931000 | 1.184568000  | 1.731844000  |
| 1                                                                                 | 4.740400000  | 4.666135000  | 1.382567000  | 1                                                                                  | 3.334301000  | 4.573788000  | 3.076295000  |
| 34                                                                                | 4.270368000  | -2.827670000 | -0.343479000 | 34                                                                                 | 5.013331000  | -1.959611000 | -0.330612000 |
| 6                                                                                 | 5.099373000  | -1.334624000 | -1.361109000 | 6                                                                                  | 5.654429000  | -0.092637000 | -0.565701000 |
| 1                                                                                 | 4.542154000  | -1.149143000 | -2.280530000 | 1                                                                                  | 5.310426000  | 0.306709000  | -1.520887000 |
| 1                                                                                 | 5.110189000  | -0.427356000 | -0.755684000 | 1                                                                                  | 5.283341000  | 0.536662000  | 0.244218000  |
| 1                                                                                 | 6.125138000  | -1.612202000 | -1.612506000 | 1                                                                                  | 6.746297000  | -0.094684000 | -0.549208000 |
| 6                                                                                 | -3.652057000 | -3.554238000 | -0.212501000 | 6                                                                                  | -4.401559000 | -2.235874000 | 1.714436000  |
| 8                                                                                 | -3.317112000 | -4.628855000 | 0.227207000  | 8                                                                                  | -5.565101000 | -1.964056000 | 1.527072000  |
| 8                                                                                 | -3.201203000 | -3.063573000 | -1.383685000 | 8                                                                                  | -3.618909000 | -1.539576000 | 2.565265000  |
| 1                                                                                 | -2.501278000 | -3.653443000 | -1.706026000 | 1                                                                                  | -4.139366000 | -0.789133000 | 2.891861000  |

|                                                                           |              |              |              |                                                                         |              |              |              |
|---------------------------------------------------------------------------|--------------|--------------|--------------|-------------------------------------------------------------------------|--------------|--------------|--------------|
| 7                                                                         | -5.716520000 | -3.306134000 | 1.154038000  | 7                                                                       | -4.453127000 | -4.620851000 | 1.023666000  |
| 1                                                                         | -5.333329000 | -4.031337000 | 1.755442000  | 1                                                                       | -5.374123000 | -4.430625000 | 0.637473000  |
| 1                                                                         | -6.295579000 | -3.780596000 | 0.467582000  | 1                                                                       | -4.593942000 | -4.965997000 | 1.968138000  |
| <p style="text-align: center;"><b>3,5-T2AM·MeSe<sup>-</sup>_trans</b></p> |              |              |              | <p style="text-align: center;"><b>3,5-T2AM·MeSe<sup>-</sup>_cis</b></p> |              |              |              |
| 6                                                                         | 2.492537000  | 2.155037000  | 0.822174000  | 6                                                                       | 2.420157000  | 2.417308000  | 0.065500000  |
| 6                                                                         | 1.097097000  | 2.115502000  | 0.727815000  | 6                                                                       | 1.024597000  | 2.314372000  | 0.069661000  |
| 6                                                                         | 0.410493000  | 1.022662000  | 0.201017000  | 6                                                                       | 0.359877000  | 1.121072000  | -0.210232000 |
| 53                                                                        | -1.887088000 | 1.213344000  | -0.039481000 | 53                                                                      | -1.956999000 | 1.172066000  | -0.303963000 |
| 6                                                                         | 1.149449000  | -0.081735000 | -0.229426000 | 6                                                                       | 1.121262000  | -0.015418000 | -0.493329000 |
| 8                                                                         | 0.533250000  | -1.175389000 | -0.817697000 | 8                                                                       | 0.522499000  | -1.215373000 | -0.845426000 |
| 6                                                                         | 2.543635000  | -0.052397000 | -0.149475000 | 6                                                                       | 2.514255000  | 0.078472000  | -0.520948000 |
| 6                                                                         | 3.218890000  | 1.050392000  | 0.367922000  | 6                                                                       | 3.167100000  | 1.277182000  | -0.245680000 |
| 6                                                                         | 3.204707000  | 3.381751000  | 1.350805000  | 6                                                                       | 3.110160000  | 3.718377000  | 0.415234000  |
| 6                                                                         | 3.435759000  | 4.445925000  | 0.268511000  | 6                                                                       | 3.311116000  | 3.896051000  | 1.927109000  |
| 1                                                                         | 4.080969000  | 4.029624000  | -0.511188000 | 1                                                                       | 2.333045000  | 3.925488000  | 2.415772000  |
| 6                                                                         | -0.116149000 | -2.100693000 | -0.029950000 | 6                                                                       | -0.023205000 | -2.022321000 | 0.128490000  |
| 6                                                                         | -0.945528000 | -3.001302000 | -0.695017000 | 6                                                                       | -0.831488000 | -3.064802000 | -0.320172000 |
| 6                                                                         | -1.607540000 | -3.996449000 | 0.016591000  | 6                                                                       | -1.393963000 | -3.953128000 | 0.590397000  |
| 1                                                                         | -2.258768000 | -4.690122000 | -0.508446000 | 1                                                                       | -2.029553000 | -4.758861000 | 0.232985000  |
| 6                                                                         | -1.450719000 | -4.092959000 | 1.398998000  | 6                                                                       | -1.158404000 | -3.800567000 | 1.956508000  |
| 8                                                                         | -2.087776000 | -5.062138000 | 2.151062000  | 8                                                                       | -1.696682000 | -4.654755000 | 2.900895000  |
| 6                                                                         | -0.623875000 | -3.192339000 | 2.062013000  | 6                                                                       | -0.351738000 | -2.759539000 | 2.403317000  |
| 6                                                                         | 0.046339000  | -2.199277000 | 1.351166000  | 6                                                                       | 0.219345000  | -1.872598000 | 1.493170000  |
| 1                                                                         | 0.521711000  | 2.973073000  | 1.068703000  | 1                                                                       | 0.431532000  | 3.200994000  | 0.280303000  |
| 53                                                                        | 3.707939000  | -1.725961000 | -0.846508000 | 53                                                                      | 3.712008000  | -1.642325000 | -1.023137000 |
| 1                                                                         | 4.300908000  | 1.048046000  | 0.420163000  | 1                                                                       | 4.248920000  | 1.323888000  | -0.280480000 |
| 1                                                                         | 4.172413000  | 3.111249000  | 1.783978000  | 1                                                                       | 2.531777000  | 4.568815000  | 0.042431000  |
| 1                                                                         | 2.609095000  | 3.825960000  | 2.157766000  | 1                                                                       | 4.089198000  | 3.760056000  | -0.078142000 |
| 1                                                                         | -1.075101000 | -2.901863000 | -1.765439000 | 1                                                                       | -1.022915000 | -3.159267000 | -1.381694000 |
| 1                                                                         | -0.516227000 | -3.266917000 | 3.137602000  | 1                                                                       | -0.183058000 | -2.640882000 | 3.467038000  |
| 1                                                                         | 0.677588000  | -1.493028000 | 1.874169000  | 1                                                                       | 0.834555000  | -1.056125000 | 1.847872000  |
| 1                                                                         | -2.733017000 | -5.510734000 | 1.596340000  | 1                                                                       | -2.350198000 | -5.216644000 | 2.473705000  |
| 34                                                                        | -4.821266000 | 1.567943000  | -0.378185000 | 34                                                                      | -4.923213000 | 1.324101000  | -0.441019000 |
| 6                                                                         | -5.107627000 | -0.173855000 | -1.293316000 | 6                                                                       | -5.191442000 | -0.627014000 | -0.714408000 |
| 1                                                                         | -4.563895000 | -0.197213000 | -2.238901000 | 1                                                                       | -4.730185000 | -0.944123000 | -1.650900000 |
| 1                                                                         | -4.764060000 | -0.992330000 | -0.659205000 | 1                                                                       | -4.750920000 | -1.186400000 | 0.112007000  |
| 1                                                                         | -6.175065000 | -0.294096000 | -1.489825000 | 1                                                                       | -6.263729000 | -0.829495000 | -0.755611000 |
| 7                                                                         | 4.114004000  | 5.623564000  | 0.835175000  | 7                                                                       | 3.998873000  | 5.164867000  | 2.214632000  |
| 1                                                                         | 3.513250000  | 6.081453000  | 1.514808000  | 1                                                                       | 4.948548000  | 5.144302000  | 1.854693000  |
| 1                                                                         | 4.308583000  | 6.306468000  | 0.109821000  | 1                                                                       | 4.063755000  | 5.320568000  | 3.215301000  |

|                                                                                                                                                       |              |              |              |                                                                                                                                                      |              |              |              |
|-------------------------------------------------------------------------------------------------------------------------------------------------------|--------------|--------------|--------------|------------------------------------------------------------------------------------------------------------------------------------------------------|--------------|--------------|--------------|
| 1                                                                                                                                                     | 2.472918000  | 4.682776000  | -0.206772000 | 1                                                                                                                                                    | 3.838541000  | 3.014225000  | 2.321794000  |
| 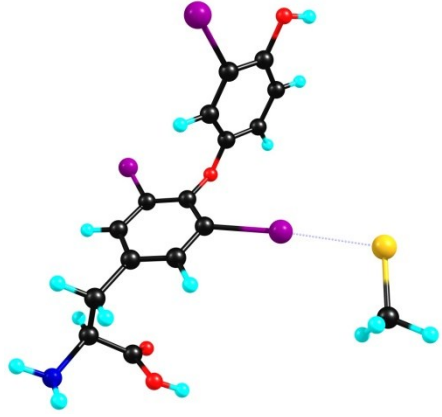 <p style="text-align: center;"><b>T3·MeSe<sup>-</sup>_trans</b></p> |              |              |              |  <p style="text-align: center;"><b>T3·MeSe<sup>-</sup>_cis</b></p> |              |              |              |
| 6                                                                                                                                                     | 2.713639000  | -1.420394000 | 1.118891000  | 6                                                                                                                                                    | 1.973025000  | -2.698140000 | -0.153187000 |
| 6                                                                                                                                                     | 2.207014000  | -0.129375000 | 0.939559000  | 6                                                                                                                                                    | 0.594644000  | -2.504258000 | -0.298670000 |
| 6                                                                                                                                                     | 1.191759000  | 0.156866000  | 0.027711000  | 6                                                                                                                                                    | -0.096497000 | -1.504864000 | 0.382050000  |
| 53                                                                                                                                                    | 0.619801000  | 2.393713000  | -0.269859000 | 53                                                                                                                                                   | -2.420800000 | -1.504308000 | 0.231775000  |
| 6                                                                                                                                                     | 0.654204000  | -0.894542000 | -0.715115000 | 6                                                                                                                                                    | 0.626008000  | -0.654841000 | 1.222396000  |
| 8                                                                                                                                                     | -0.317161000 | -0.669674000 | -1.681650000 | 8                                                                                                                                                    | -0.012446000 | 0.318738000  | 1.977662000  |
| 6                                                                                                                                                     | 1.156510000  | -2.188740000 | -0.554650000 | 6                                                                                                                                                    | 1.998351000  | -0.846543000 | 1.391486000  |
| 6                                                                                                                                                     | 2.177448000  | -2.459496000 | 0.351319000  | 6                                                                                                                                                    | 2.675502000  | -1.859682000 | 0.716904000  |
| 6                                                                                                                                                     | 3.829736000  | -1.687277000 | 2.106727000  | 6                                                                                                                                                    | 2.683927000  | -3.800077000 | -0.909231000 |
| 6                                                                                                                                                     | 5.239679000  | -1.865372000 | 1.481879000  | 6                                                                                                                                                    | 3.123547000  | -3.434558000 | -2.352271000 |
| 1                                                                                                                                                     | 5.229656000  | -2.714087000 | 0.795999000  | 1                                                                                                                                                    | 2.259642000  | -3.075804000 | -2.913570000 |
| 6                                                                                                                                                     | -1.604376000 | -0.375700000 | -1.299351000 | 6                                                                                                                                                    | -0.498125000 | 1.448024000  | 1.359231000  |
| 6                                                                                                                                                     | -2.387320000 | 0.316242000  | -2.220603000 | 6                                                                                                                                                    | -1.557974000 | 2.098772000  | 1.985981000  |
| 6                                                                                                                                                     | -3.712680000 | 0.598395000  | -1.923849000 | 6                                                                                                                                                    | -2.058116000 | 3.275388000  | 1.447435000  |
| 1                                                                                                                                                     | -4.316906000 | 1.150364000  | -2.638491000 | 1                                                                                                                                                    | -2.894730000 | 3.773818000  | 1.929318000  |
| 6                                                                                                                                                     | -4.280426000 | 0.207163000  | -0.708546000 | 6                                                                                                                                                    | -1.521813000 | 3.819858000  | 0.277837000  |
| 8                                                                                                                                                     | -5.587153000 | 0.482783000  | -0.391852000 | 8                                                                                                                                                    | -2.007398000 | 4.978585000  | -0.274704000 |
| 6                                                                                                                                                     | -3.484640000 | -0.487348000 | 0.201403000  | 6                                                                                                                                                    | -0.458511000 | 3.158847000  | -0.335832000 |
| 6                                                                                                                                                     | -2.153745000 | -0.784005000 | -0.085689000 | 6                                                                                                                                                    | 0.058179000  | 1.979273000  | 0.197243000  |
| 1                                                                                                                                                     | 2.624720000  | 0.685283000  | 1.525303000  | 1                                                                                                                                                    | 0.031498000  | -3.176817000 | -0.942024000 |
| 53                                                                                                                                                    | 0.362898000  | -3.818116000 | -1.715423000 | 53                                                                                                                                                   | 3.117449000  | 0.406153000  | 2.738806000  |
| 1                                                                                                                                                     | 2.544054000  | -3.472853000 | 0.462991000  | 1                                                                                                                                                    | 3.737766000  | -1.998961000 | 0.873575000  |
| 1                                                                                                                                                     | 3.620621000  | -2.603417000 | 2.671870000  | 1                                                                                                                                                    | 2.016374000  | -4.663915000 | -0.999818000 |
| 1                                                                                                                                                     | 3.879163000  | -0.868593000 | 2.830299000  | 1                                                                                                                                                    | 3.567388000  | -4.133164000 | -0.355871000 |
| 1                                                                                                                                                     | -1.938558000 | 0.645364000  | -3.148669000 | 1                                                                                                                                                    | -1.992639000 | 1.660723000  | 2.874903000  |
| 53                                                                                                                                                    | -4.312142000 | -1.113817000 | 2.063045000  | 53                                                                                                                                                   | 0.402971000  | 3.959802000  | -2.112658000 |
| 1                                                                                                                                                     | -1.545441000 | -1.316497000 | 0.631802000  | 1                                                                                                                                                    | 0.877313000  | 1.471519000  | -0.292777000 |
| 1                                                                                                                                                     | -5.944575000 | 1.088717000  | -1.048453000 | 1                                                                                                                                                    | -2.821808000 | 5.220184000  | 0.177363000  |
| 34                                                                                                                                                    | 0.111417000  | 5.292429000  | -0.570164000 | 34                                                                                                                                                   | -5.360542000 | -1.738078000 | 0.008581000  |
| 6                                                                                                                                                     | 1.816987000  | 5.864287000  | 0.275240000  | 6                                                                                                                                                    | -5.336985000 | -3.503324000 | -0.904719000 |
| 1                                                                                                                                                     | 1.868088000  | 5.503456000  | 1.303659000  | 1                                                                                                                                                    | -4.788126000 | -3.433363000 | -1.844984000 |
| 1                                                                                                                                                     | 2.666457000  | 5.475003000  | -0.288009000 | 1                                                                                                                                                    | -4.867636000 | -4.253012000 | -0.266016000 |
| 1                                                                                                                                                     | 1.856623000  | 6.955447000  | 0.275614000  | 1                                                                                                                                                    | -6.366646000 | -3.801925000 | -1.111668000 |
| 6                                                                                                                                                     | 5.642561000  | -0.668327000 | 0.628619000  | 6                                                                                                                                                    | 4.126399000  | -2.288209000 | -2.378957000 |
| 8                                                                                                                                                     | 5.884503000  | -0.691609000 | -0.548727000 | 8                                                                                                                                                    | 3.976922000  | -1.223150000 | -2.914839000 |
| 8                                                                                                                                                     | 5.712015000  | 0.466482000  | 1.371921000  | 8                                                                                                                                                    | 5.273085000  | -2.615095000 | -1.717648000 |
| 1                                                                                                                                                     | 5.930616000  | 1.193618000  | 0.769719000  | 1                                                                                                                                                    | 5.863106000  | -1.849948000 | -1.786899000 |
| 7                                                                                                                                                     | 6.308807000  | -2.093317000 | 2.466069000  | 7                                                                                                                                                    | 3.718740000  | -4.551122000 | -3.102361000 |

|                                                                                                                                                         |              |              |              |                                                                                                                                                        |              |              |              |
|---------------------------------------------------------------------------------------------------------------------------------------------------------|--------------|--------------|--------------|--------------------------------------------------------------------------------------------------------------------------------------------------------|--------------|--------------|--------------|
| 1                                                                                                                                                       | 6.129501000  | -2.950570000 | 2.979452000  | 1                                                                                                                                                      | 3.020616000  | -5.269130000 | -3.266768000 |
| 1                                                                                                                                                       | 6.330845000  | -1.333052000 | 3.139717000  | 1                                                                                                                                                      | 4.474656000  | -4.971652000 | -2.569848000 |
| 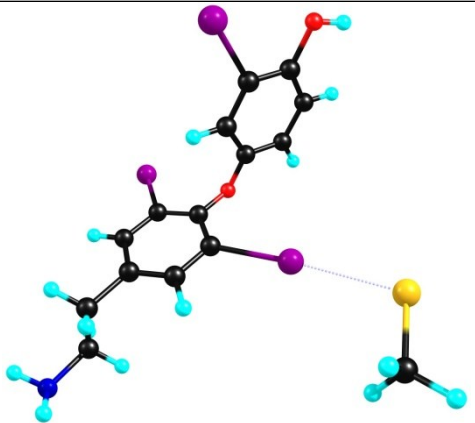 <p style="text-align: center;"><b>T3AM·MeSe<sup>-</sup>_trans</b></p> |              |              |              |  <p style="text-align: center;"><b>T3AM·MeSe<sup>-</sup>_cis</b></p> |              |              |              |
| 6                                                                                                                                                       | 0.236270000  | 3.363992000  | 1.276007000  | 6                                                                                                                                                      | -0.856318000 | -3.425170000 | 0.945576000  |
| 6                                                                                                                                                       | -0.799187000 | 2.448344000  | 1.059396000  | 6                                                                                                                                                      | 0.333911000  | -2.695724000 | 0.847364000  |
| 6                                                                                                                                                       | -0.716640000 | 1.434807000  | 0.105865000  | 6                                                                                                                                                      | 0.488168000  | -1.627760000 | -0.035057000 |
| 53                                                                                                                                                      | -2.601080000 | 0.120007000  | -0.243742000 | 53                                                                                                                                                     | 2.594081000  | -0.656604000 | -0.207153000 |
| 6                                                                                                                                                       | 0.453858000  | 1.326637000  | -0.646383000 | 6                                                                                                                                                      | -0.596100000 | -1.269721000 | -0.837920000 |
| 8                                                                                                                                                       | 0.575738000  | 0.371256000  | -1.647907000 | 8                                                                                                                                                      | -0.486331000 | -0.253877000 | -1.779434000 |
| 6                                                                                                                                                       | 1.489586000  | 2.243363000  | -0.455121000 | 6                                                                                                                                                      | -1.782962000 | -2.001738000 | -0.768810000 |
| 6                                                                                                                                                       | 1.391456000  | 3.256289000  | 0.495064000  | 6                                                                                                                                                      | -1.922026000 | -3.071019000 | 0.112251000  |
| 6                                                                                                                                                       | 0.095002000  | 4.478659000  | 2.289570000  | 6                                                                                                                                                      | -1.003796000 | -4.548902000 | 1.947614000  |
| 6                                                                                                                                                       | -0.504023000 | 5.771865000  | 1.693388000  | 6                                                                                                                                                      | -1.535914000 | -4.074750000 | 3.318419000  |
| 1                                                                                                                                                       | 0.130636000  | 6.118841000  | 0.872098000  | 1                                                                                                                                                      | -0.867889000 | -3.306724000 | 3.718642000  |
| 6                                                                                                                                                       | 0.803355000  | -0.941258000 | -1.310544000 | 6                                                                                                                                                      | -0.496071000 | 1.056887000  | -1.368410000 |
| 6                                                                                                                                                       | 0.477698000  | -1.897440000 | -2.270286000 | 6                                                                                                                                                      | 0.046708000  | 1.991043000  | -2.248428000 |
| 6                                                                                                                                                       | 0.725954000  | -3.238942000 | -2.018922000 | 6                                                                                                                                                      | 0.020266000  | 3.339611000  | -1.924376000 |
| 1                                                                                                                                                       | 0.458636000  | -3.983036000 | -2.764172000 | 1                                                                                                                                                      | 0.454958000  | 4.064310000  | -2.607350000 |
| 6                                                                                                                                                       | 1.294004000  | -3.655431000 | -0.812200000 | 6                                                                                                                                                      | -0.537101000 | 3.784044000  | -0.722578000 |
| 8                                                                                                                                                       | 1.542350000  | -4.977948000 | -0.540441000 | 8                                                                                                                                                      | -0.569796000 | 5.113330000  | -0.381159000 |
| 6                                                                                                                                                       | 1.617690000  | -2.686514000 | 0.136222000  | 6                                                                                                                                                      | -1.077489000 | 2.837648000  | 0.146571000  |
| 6                                                                                                                                                       | 1.378318000  | -1.334828000 | -0.103716000 | 6                                                                                                                                                      | -1.062635000 | 1.480103000  | -0.167603000 |
| 1                                                                                                                                                       | -1.708083000 | 2.531182000  | 1.650772000  | 1                                                                                                                                                      | 1.180454000  | -2.983196000 | 1.466588000  |
| 53                                                                                                                                                      | 3.284928000  | 2.124679000  | -1.640529000 | 53                                                                                                                                                     | -3.439849000 | -1.519009000 | -2.058263000 |
| 1                                                                                                                                                       | 2.211119000  | 3.951546000  | 0.630269000  | 1                                                                                                                                                      | -2.850847000 | -3.627750000 | 0.143759000  |
| 1                                                                                                                                                       | 1.073699000  | 4.714665000  | 2.725293000  | 1                                                                                                                                                      | -0.032927000 | -5.034963000 | 2.098653000  |
| 1                                                                                                                                                       | -0.544891000 | 4.144178000  | 3.114210000  | 1                                                                                                                                                      | -1.683322000 | -5.314963000 | 1.554418000  |
| 1                                                                                                                                                       | 0.013417000  | -1.577638000 | -3.194055000 | 1                                                                                                                                                      | 0.501045000  | 1.645202000  | -3.167703000 |
| 53                                                                                                                                                      | 2.500618000  | -3.272541000 | 1.985203000  | 53                                                                                                                                                     | -1.951947000 | 3.467647000  | 1.985123000  |
| 1                                                                                                                                                       | 1.623888000  | -0.595384000 | 0.645377000  | 1                                                                                                                                                      | -1.478390000 | 0.756363000  | 0.518969000  |
| 1                                                                                                                                                       | 1.129182000  | -5.517793000 | -1.221485000 | 1                                                                                                                                                      | -0.031100000 | 5.607911000  | -1.006588000 |
| 34                                                                                                                                                      | -5.127835000 | -1.389740000 | -0.592409000 | 34                                                                                                                                                     | 5.365198000  | 0.381706000  | -0.366787000 |
| 6                                                                                                                                                       | -6.167766000 | -0.300775000 | 0.705155000  | 6                                                                                                                                                      | 6.213902000  | -1.228138000 | 0.432918000  |
| 1                                                                                                                                                       | -5.714548000 | -0.360615000 | 1.695774000  | 1                                                                                                                                                      | 5.857354000  | -1.375904000 | 1.453418000  |
| 1                                                                                                                                                       | -6.199100000 | 0.741330000  | 0.383628000  | 1                                                                                                                                                      | 5.982007000  | -2.112138000 | -0.162977000 |
| 1                                                                                                                                                       | -7.185921000 | -0.692384000 | 0.752144000  | 1                                                                                                                                                      | 7.295596000  | -1.080042000 | 0.448908000  |
| 7                                                                                                                                                       | -0.676646000 | 6.884625000  | 2.634664000  | 7                                                                                                                                                      | -1.686441000 | -5.120384000 | 4.337169000  |
| 1                                                                                                                                                       | 0.208963000  | 7.129451000  | 3.067802000  | 1                                                                                                                                                      | -0.791314000 | -5.556667000 | 4.537082000  |
| 1                                                                                                                                                       | -1.309158000 | 6.623537000  | 3.385213000  | 1                                                                                                                                                      | -2.305554000 | -5.855502000 | 4.008482000  |
| 1                                                                                                                                                       | -1.479826000 | 5.548104000  | 1.252802000  | 1                                                                                                                                                      | -2.509053000 | -3.593181000 | 3.181304000  |

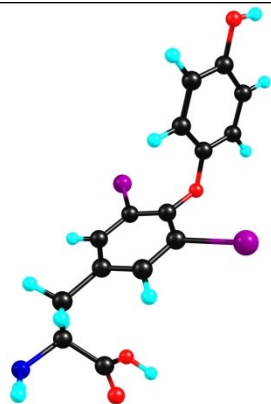

**3,5-T2**

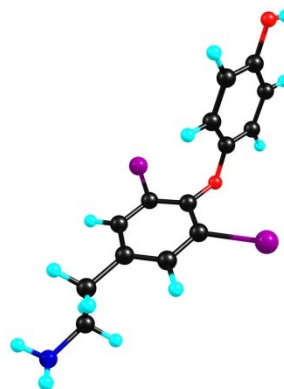

**3,5-T2AM**

|    |              |              |              |
|----|--------------|--------------|--------------|
| 6  | -2.289714000 | 0.275869000  | 1.007904000  |
| 6  | -1.742949000 | -0.971890000 | 0.699715000  |
| 6  | -0.504010000 | -1.067032000 | 0.069672000  |
| 53 | 0.257025000  | -2.990866000 | -0.422717000 |
| 6  | 0.227277000  | 0.080522000  | -0.260045000 |
| 8  | 1.408646000  | -0.009682000 | -0.944568000 |
| 6  | -0.335533000 | 1.329412000  | 0.036253000  |
| 6  | -1.572269000 | 1.425520000  | 0.665953000  |
| 6  | -3.646309000 | 0.389943000  | 1.667868000  |
| 6  | -4.807166000 | 0.690290000  | 0.691143000  |
| 1  | -4.601662000 | 1.622793000  | 0.162027000  |
| 6  | 2.613047000  | -0.113406000 | -0.250761000 |
| 6  | 3.751855000  | -0.248604000 | -1.037323000 |
| 6  | 4.999703000  | -0.361461000 | -0.433067000 |
| 1  | 5.886680000  | -0.468030000 | -1.050429000 |
| 6  | 5.111008000  | -0.339990000 | 0.958477000  |
| 8  | 6.313955000  | -0.450412000 | 1.610141000  |
| 6  | 3.965857000  | -0.201601000 | 1.738489000  |
| 6  | 2.714758000  | -0.087053000 | 1.136628000  |
| 1  | -2.289731000 | -1.873635000 | 0.945591000  |
| 53 | 0.685003000  | 3.112613000  | -0.515539000 |
| 1  | -1.981502000 | 2.402936000  | 0.890584000  |
| 1  | -3.646044000 | 1.196399000  | 2.404687000  |
| 1  | -3.880387000 | -0.536904000 | 2.199244000  |
| 1  | 3.651459000  | -0.266268000 | -2.115359000 |
| 1  | 4.061340000  | -0.185098000 | 2.817206000  |
| 1  | 1.831594000  | 0.020682000  | 1.753243000  |
| 1  | 7.024324000  | -0.546835000 | 0.967974000  |
| 6  | -4.919127000 | -0.435134000 | -0.341307000 |
| 8  | -5.236829000 | -1.569759000 | -0.078839000 |
| 8  | -4.641473000 | -0.021092000 | -1.596628000 |
| 1  | -4.720240000 | -0.789387000 | -2.184336000 |
| 7  | -6.040483000 | 0.858912000  | 1.457540000  |
| 1  | -6.339964000 | -0.031808000 | 1.844690000  |
| 1  | -6.792888000 | 1.205386000  | 0.871208000  |

|    |              |              |              |
|----|--------------|--------------|--------------|
| 6  | 2.821942000  | 0.015471000  | 0.802748000  |
| 6  | 2.170450000  | 1.215901000  | 0.507879000  |
| 6  | 0.898858000  | 1.215093000  | -0.059106000 |
| 53 | -0.024724000 | 3.073186000  | -0.527956000 |
| 6  | 0.235965000  | 0.014274000  | -0.342004000 |
| 8  | -0.981570000 | 0.015137000  | -0.967673000 |
| 6  | 0.901747000  | -1.186360000 | -0.063096000 |
| 6  | 2.172194000  | -1.185919000 | 0.505432000  |
| 6  | 4.222769000  | 0.014297000  | 1.369766000  |
| 6  | 5.314783000  | -0.055622000 | 0.272827000  |
| 7  | 6.694497000  | -0.061311000 | 0.748787000  |
| 1  | 5.193868000  | 0.792777000  | -0.407854000 |
| 6  | -2.153765000 | -0.002438000 | -0.214174000 |
| 6  | -3.338792000 | -0.014898000 | -0.941812000 |
| 6  | -4.559258000 | -0.032502000 | -0.274494000 |
| 1  | -5.482640000 | -0.042453000 | -0.845922000 |
| 6  | -4.596986000 | -0.037980000 | 1.121125000  |
| 8  | -5.770278000 | -0.056044000 | 1.833553000  |
| 6  | -3.405755000 | -0.024724000 | 1.841993000  |
| 6  | -2.181842000 | -0.006578000 | 1.176975000  |
| 1  | 2.658821000  | 2.158976000  | 0.720581000  |
| 53 | -0.014067000 | -3.045525000 | -0.542969000 |
| 1  | 2.661649000  | -2.128878000 | 0.716499000  |
| 1  | 4.346835000  | -0.838412000 | 2.046129000  |
| 1  | 4.379975000  | 0.918090000  | 1.967840000  |
| 1  | 6.914813000  | 0.778686000  | 1.273486000  |
| 1  | 6.882169000  | -0.857515000 | 1.349103000  |
| 1  | -3.295290000 | -0.011255000 | -2.023768000 |
| 1  | -3.444308000 | -0.028886000 | 2.924379000  |
| 1  | -1.261820000 | 0.003602000  | 1.747454000  |
| 1  | -6.518405000 | -0.066746000 | 1.228207000  |
| 1  | 5.159691000  | -0.955680000 | -0.330002000 |



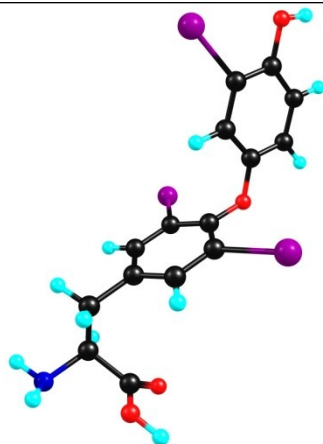

**T3**

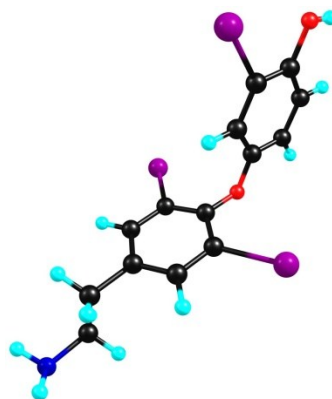

**T3AM**

|    |              |              |              |    |              |              |              |
|----|--------------|--------------|--------------|----|--------------|--------------|--------------|
| 6  | -2.788148000 | 0.257163000  | 1.120420000  | 6  | 3.217763000  | 0.000979000  | 1.243260000  |
| 6  | -2.354944000 | -0.972841000 | 0.621045000  | 6  | 2.711507000  | 1.201830000  | 0.738461000  |
| 6  | -1.334181000 | -1.035697000 | -0.324065000 | 6  | 1.716901000  | 1.201762000  | -0.235437000 |
| 53 | -0.754173000 | -2.931702000 | -1.092472000 | 53 | 1.026738000  | 3.061263000  | -1.007025000 |
| 6  | -0.710347000 | 0.128980000  | -0.785672000 | 6  | 1.191203000  | 0.000095000  | -0.726066000 |
| 8  | 0.248834000  | 0.070544000  | -1.762938000 | 8  | 0.255751000  | -0.000588000 | -1.729082000 |
| 6  | -1.161797000 | 1.361905000  | -0.296408000 | 6  | 1.719400000  | -1.201038000 | -0.236926000 |
| 6  | -2.182614000 | 1.424326000  | 0.646530000  | 6  | 2.714102000  | -1.200278000 | 0.736901000  |
| 6  | -3.914446000 | 0.330817000  | 2.127234000  | 6  | 4.330730000  | 0.001508000  | 2.265241000  |
| 6  | -5.306493000 | 0.677444000  | 1.520883000  | 6  | 5.739211000  | 0.003657000  | 1.619275000  |
| 1  | -5.237351000 | 1.625312000  | 0.984403000  | 7  | 6.864268000  | 0.003893000  | 2.548648000  |
| 6  | 1.591712000  | -0.015757000 | -1.417673000 | 1  | 5.834382000  | 0.879684000  | 0.970283000  |
| 6  | 2.490380000  | -0.051536000 | -2.479212000 | 6  | -1.097607000 | 0.000829000  | -1.417534000 |
| 6  | 3.850830000  | -0.136831000 | -2.218714000 | 6  | -1.969695000 | 0.004310000  | -2.501742000 |
| 1  | 4.553298000  | -0.164431000 | -3.046456000 | 6  | -3.338936000 | 0.005358000  | -2.276197000 |
| 6  | 4.334932000  | -0.186840000 | -0.907622000 | 1  | -4.020602000 | 0.008118000  | -3.121633000 |
| 8  | 5.667531000  | -0.269462000 | -0.622075000 | 6  | -3.858330000 | 0.003022000  | -0.977772000 |
| 6  | 3.417387000  | -0.150437000 | 0.143943000  | 8  | -5.200568000 | 0.004078000  | -0.726730000 |
| 6  | 2.047436000  | -0.065841000 | -0.105294000 | 6  | -2.967434000 | -0.000521000 | 0.097077000  |
| 1  | -2.818078000 | -1.887471000 | 0.969080000  | 6  | -1.588843000 | -0.001701000 | -0.116977000 |
| 53 | -0.306561000 | 3.171986000  | -1.015248000 | 1  | 3.096042000  | 2.144757000  | 1.107280000  |
| 1  | -2.507825000 | 2.389650000  | 1.014890000  | 53 | 1.032249000  | -3.060864000 | -1.010322000 |
| 1  | -3.693099000 | 1.103799000  | 2.870102000  | 1  | 3.100672000  | -2.142879000 | 1.104418000  |
| 1  | -3.998649000 | -0.617214000 | 2.664914000  | 1  | 4.239567000  | -0.878339000 | 2.910957000  |
| 1  | 2.116919000  | -0.011909000 | -3.494395000 | 1  | 4.237303000  | 0.879929000  | 2.912564000  |
| 53 | 4.104029000  | -0.223486000 | 2.153477000  | 1  | 6.857472000  | 0.822898000  | 3.147561000  |
| 1  | 1.350577000  | -0.039515000 | 0.720866000  | 1  | 6.858150000  | -0.815360000 | 3.147235000  |
| 1  | 6.174999000  | -0.287400000 | -1.440030000 | 1  | -1.568809000 | 0.006191000  | -3.507190000 |
| 6  | -5.729799000 | -0.345920000 | 0.473131000  | 53 | -3.709589000 | -0.004371000 | 2.087679000  |
| 8  | -5.853200000 | -0.139428000 | -0.703941000 | 1  | -0.912724000 | -0.004528000 | 0.726746000  |
| 8  | -5.952783000 | -1.563186000 | 1.035339000  | 1  | -5.686718000 | 0.006878000  | -1.557703000 |
| 1  | -6.246605000 | -2.159108000 | 0.329642000  | 1  | 5.835983000  | -0.870920000 | 0.968528000  |
| 7  | -6.382738000 | 0.792215000  | 2.504254000  |    |              |              |              |
| 1  | -6.217705000 | 1.567636000  | 3.136660000  |    |              |              |              |
| 1  | -6.474465000 | -0.056514000 | 3.053195000  |    |              |              |              |

## References:

1. M. E. Hart, K. L. Suchland, M. Miyakawa, J. R. Bunzow, D. K. Grandy and T. S. Scanlan, *J. Med. Chem.*, 2006, **49**, 1101.
2. (a) A. D. Becke, *J. Chem. Phys.*, 1993, **98**, 5648; (b) C. Lee, W. Yang and R. G. Parr, *Phys. Rev. B*, 1988, **37**, 785.
3. (a) A. E. Reed, L. A. Curtiss and F. Weinhold, *Chem. Rev.*, 1988, **88**, 899; (b) E. D. Glendening, J. E. Reed, J. E. Carpenter and F. Weinhold, *NBO Program 3.1*; Madison, WI, 1988.
4. (a) Gaussian 03, Revision C.02, M. J. Frisch, G. W. Trucks, H. B. Schlegel, G. E. Scuseria, M. A. Robb, J. R. Cheeseman, J. A. Jr. Montgomery, T. Vreven, K. N. Kudin, J. C. Burant, J. M. Millam, S. S. Iyengar, J. Tomasi, V. Barone, B. Mennucci, M. Cossi, G. Scalmani, N. Rega, G. A. Petersson, H. Nakatsuji, M. Hada, M. Ehara, K. Toyota, R. Fukuda, J. Hasegawa, M. Ishida, T. Nakajima, Y. Honda, O. Kitao, H. Nakai, M. Klene, X. Li, J. E. Knox, H. P. Hratchian, J. B. Cross, C. Adamo, J. Jaramillo, R. Gomperts, R. E. Stratmann, O. Yazyev, A. J. Austin, R. Cammi, C. Pomelli, J. W. Ochterski, P. Y. Ayala, K. Morokuma, G. A. Voth, P. Salvador, J. J. Dannenberg, V. G. Zakrzewski, S. Dapprich, A. D. Daniels, M. C. Strain, O. Farkas, D. K. Malick, A. D. Rabuck, K. Raghavachari, J. B. Foresman, J. V. Ortiz, Q. Cui, A. G. Baboul, S. Clifford, J. Cioslowski, B. B. Stefanov, G. Liu, A. Liashenko, P. Piskorz, I. Komaromi, R. L. Martin, D. J. Fox, T. Keith, M. A. Al-Laham, C. Y. Peng, A. Nanayakkara, M. Challacombe, P. M. W. Gill, B. Johnson, W. Chen, M. W. Wong, C. Gonzalez and J. A. Pople, Gaussian, Inc., Wallingford CT, 2004; (b) Gaussian 09, Revision A.1, M. J. Frisch, G. W. Trucks, H. B. Schlegel, G. E. Scuseria, M. A. Robb, J. R. Cheeseman, G. Scalmani, V. Barone, B. Mennucci, G. A. Petersson, H. Nakatsuji, M. Caricato, X. Li, H. P. Hratchian, A. F. Izmaylov, J. Bloino, G. Zheng, J. L. Sonnenberg, M. Hada, M. Ehara, K. Toyota, R. Fukuda, J. Hasegawa, M. Ishida, T. Nakajima, Y. Honda, O. Kitao, H. Nakai, T. Vreven, J. A. Jr. Montgomery, J. E. Peralta, F. Ogliaro, M. Bearpark, J. J. Heyd, E. Brothers, K. N. Kudin, V. N. Staroverov, R. Kobayashi, J. Normand, K. Raghavachari, A. Rendell, J. C. Burant, S. S. Iyengar, J. Tomasi, M. Cossi, N. Rega, N. J. Millam, M. Klene, J. E. Knox, J. B. Cross, V. Bakken, C. Adamo, J. Jaramillo, R. Gomperts, R. E. Stratmann, O. Yazyev, A. J. Austin, R. Cammi, C. Pomelli, J. W. Ochterski, R. L. Martin, K. Morokuma, V. G. Zakrzewski, G. A. Voth, P. Salvador, J. J. Dannenberg, S. Dapprich, A. D. Daniels, Ö. Farkas, J. B. Foresman, J. V. Ortiz, J. Cioslowski and D. J. Fox, Gaussian, Inc., Wallingford CT, 2009.
